# Supplementary material
Source: publisher figshare collection journal article supplement (https://acs.figshare.com/ndownloader/files/5194381)

# **A New Route to 2'-*O*-Alkyl-2-thiouridine Derivatives *via* 4-*O*-Protection of the Uracil Base and Hybridization Properties of Oligonucleotides Incorporating These Modified Nucleoside Derivatives**

Itaru Okamoto,<sup>1</sup> Koh-ichiroh Shohda,<sup>1</sup> Kohji Seio,<sup>2,3</sup> and Mitsuo Sekine<sup>1,3,\*</sup>

<sup>1</sup>Department of Life Science, Tokyo Institute of Technology

<sup>2</sup>Frontier Collaborative Research Institute, Tokyo Institute of Technology

<sup>3</sup>CREST, JST (Japan Science and Technology Corporation)

Nagatsuta, Midori-ku, Yokohama 226-8501, Japan

## **Contents of Supporting Information**

|                                                    |          |
|----------------------------------------------------|----------|
| General                                            | page S4  |
| <sup>1</sup> H-NMR spectrum of compound <b>1a</b>  | page S5  |
| <sup>13</sup> C-NMR spectrum of compound <b>1a</b> | page S6  |
| <sup>1</sup> H-NMR spectrum of compound <b>1b</b>  | page S7  |
| <sup>13</sup> C-NMR spectrum of compound <b>1b</b> | page S8  |
| <sup>1</sup> H-NMR spectrum of compound <b>1c</b>  | page S9  |
| <sup>13</sup> C-NMR spectrum of compound <b>1c</b> | page S10 |
| <sup>1</sup> H-NMR spectrum of compound <b>1d</b>  | page S11 |
| <sup>13</sup> C-NMR spectrum of compound <b>1d</b> | page S12 |
| <sup>1</sup> H-NMR spectrum of compound <b>2a</b>  | page S13 |
| <sup>13</sup> C-NMR spectrum of compound <b>2a</b> | page S14 |
| <sup>1</sup> H-NMR spectrum of compound <b>2b</b>  | page S15 |
| <sup>13</sup> C-NMR spectrum of compound <b>2b</b> | page S16 |
| <sup>1</sup> H-NMR spectrum of compound <b>2c</b>  | page S17 |
| <sup>13</sup> C-NMR spectrum of compound <b>2c</b> | page S18 |
| <sup>1</sup> H-NMR spectrum of compound <b>2d</b>  | page S19 |
| <sup>13</sup> C-NMR spectrum of compound <b>2d</b> | page S20 |
| <sup>1</sup> H-NMR spectrum of compound <b>5</b>   | page S21 |
| <sup>13</sup> C-NMR spectrum of compound <b>5</b>  | page S22 |
| <sup>1</sup> H-NMR spectrum of compound <b>6</b>   | page S23 |

|                                                    |          |
|----------------------------------------------------|----------|
| <sup>13</sup> C-NMR spectrum of compound <b>6</b>  | page S24 |
| <sup>1</sup> H-NMR spectrum of compound <b>7</b>   | page S25 |
| <sup>13</sup> C-NMR spectrum of compound <b>7</b>  | page S26 |
| <sup>1</sup> H-NMR spectrum of compound <b>8</b>   | page S27 |
| <sup>13</sup> C-NMR spectrum of compound <b>8</b>  | page S28 |
| <sup>1</sup> H-NMR spectrum of compound <b>3b</b>  | page S29 |
| <sup>13</sup> C-NMR spectrum of compound <b>3b</b> | page S30 |
| <sup>1</sup> H-NMR spectrum of compound <b>9</b>   | page S31 |
| <sup>13</sup> C-NMR spectrum of compound <b>9</b>  | page S32 |
| <sup>1</sup> H-NMR spectrum of compound <b>10</b>  | page S33 |
| <sup>13</sup> C-NMR spectrum of compound <b>10</b> | page S34 |
| <sup>1</sup> H-NMR spectrum of compound <b>11</b>  | page S35 |
| <sup>13</sup> C-NMR spectrum of compound <b>11</b> | page S36 |
| <sup>1</sup> H-NMR spectrum of compound <b>3c</b>  | page S37 |
| <sup>13</sup> C-NMR spectrum of compound <b>3c</b> | page S38 |
| <sup>1</sup> H-NMR spectrum of compound <b>12</b>  | page S39 |
| <sup>13</sup> C-NMR spectrum of compound <b>12</b> | page S40 |
| <sup>1</sup> H-NMR spectrum of compound <b>13</b>  | page S41 |
| <sup>13</sup> C-NMR spectrum of compound <b>13</b> | page S42 |
| <sup>1</sup> H-NMR spectrum of compound <b>14</b>  | page S43 |
| <sup>13</sup> C-NMR spectrum of compound <b>14</b> | page S44 |
| <sup>1</sup> H-NMR spectrum of compound <b>15</b>  | page S45 |
| <sup>13</sup> C-NMR spectrum of compound <b>15</b> | page S46 |
| <sup>1</sup> H-NMR spectrum of compound <b>16</b>  | page S47 |
| <sup>13</sup> C-NMR spectrum of compound <b>16</b> | page S48 |
| <sup>1</sup> H-NMR spectrum of compound <b>17</b>  | page S49 |
| <sup>13</sup> C-NMR spectrum of compound <b>17</b> | page S50 |
| <sup>1</sup> H-NMR spectrum of compound <b>18</b>  | page S51 |
| <sup>13</sup> C-NMR spectrum of compound <b>18</b> | page S52 |
| <sup>1</sup> H-NMR spectrum of compound <b>3d</b>  | page S53 |
| <sup>13</sup> C-NMR spectrum of compound <b>3d</b> | page S54 |
| <sup>1</sup> H-NMR spectrum of compound <b>20</b>  | page S55 |
| <sup>13</sup> C-NMR spectrum of compound <b>20</b> | page S56 |
| <sup>1</sup> H-NMR spectrum of compound <b>21</b>  | page S57 |
| <sup>13</sup> C-NMR spectrum of compound <b>21</b> | page S58 |

|                                                     |          |
|-----------------------------------------------------|----------|
| <sup>1</sup> H-NMR spectrum of compound <b>23</b>   | page S59 |
| <sup>13</sup> C-NMR spectrum of compound <b>23</b>  | page S60 |
| <sup>1</sup> H-NMR spectrum of compound <b>3e</b>   | page S61 |
| <sup>13</sup> C-NMR spectrum of compound <b>3e</b>  | page S62 |
| <sup>1</sup> H-NMR spectrum of compound <b>24c</b>  | page S63 |
| <sup>13</sup> C-NMR spectrum of compound <b>24c</b> | page S64 |
| <sup>1</sup> H-NMR spectrum of compound <b>24d</b>  | page S65 |
| <sup>13</sup> C-NMR spectrum of compound <b>24d</b> | page S66 |
| <sup>1</sup> H-NMR spectrum of compound <b>24e</b>  | page S67 |
| <sup>13</sup> C-NMR spectrum of compound <b>24e</b> | page S68 |
| <sup>1</sup> H-NMR spectrum of compound <b>25c</b>  | page S69 |
| <sup>13</sup> C-NMR spectrum of compound <b>25c</b> | page S70 |
| <sup>31</sup> P-NMR spectrum of compound <b>25c</b> | page S71 |
| <sup>1</sup> H-NMR spectrum of compound <b>25d</b>  | page S72 |
| <sup>13</sup> C-NMR spectrum of compound <b>25d</b> | page S73 |
| <sup>31</sup> P-NMR spectrum of compound <b>25d</b> | page S74 |
| <sup>1</sup> H-NMR spectrum of compound <b>25e</b>  | page S75 |
| <sup>13</sup> C-NMR spectrum of compound <b>25e</b> | page S76 |
| <sup>31</sup> P-NMR spectrum of compound <b>25e</b> | page S77 |

**General.**  $^1\text{H}$  NMR spectra were recorded at 270 MHz and the chemical shifts were measured from tetramethylsilane (in  $\text{CDCl}_3$ ) as an internal standard or DSS (in  $\text{D}_2\text{O}$ ) as an external standard.  $^{13}\text{C}$  NMR spectra were recorded at 68 MHz and the chemical shifts were measured from  $\text{CDCl}_3$  (77 ppm) as an internal standard or DSS (0 ppm, in  $\text{D}_2\text{O}$ ) as the external standard.  $^{31}\text{P}$  NMR spectra were recorded at 109 MHz and the chemical shifts were measured from 85%  $\text{H}_3\text{PO}_4$  as an external standard. The  $^1\text{H}$ - $^1\text{H}$  coupling constants were measured at 400 MHz at 25 °C. Pyridine was distilled twice from *p*-toluenesulfonyl chloride and  $\text{CaH}_2$  after being refluxed for several hours and stored over molecular sieves 4A. The other dry solvents were purchased and stored over molecular sieves 4A. TLC was performed on precoated glass plates of silica gel. Column chromatography was carried out with silica gel C-200 and C-60. The solid-phase synthesis of oligonucleotides was carried out on a DNA/RNA synthesizer model 392 using normal phosphoramidite protocol. Reversed-phase HPLC was performed using a C18 column with a linear gradient (0-30%) starting from 0.1 M  $\text{NH}_4\text{OAc}$  (pH 7.0) and applying  $\text{CH}_3\text{CN}$  at a flow rate of 1.0 mL/min for 30 min at room temperature. Anion-exchange HPLC was performed on an HPLC apparatus using a FAX column with a linear gradient (0-25%) starting from 25 mM phosphate buffer (pH 6.0) and applying 25 mM phosphate buffer containing 1 M  $\text{NaCl}$  (pH 6.0) at a flow rate of 1.0 mL/min at 50 °C. The MALDI-TOF mass spectrometry was carried out.

DE FILE C:\My Documents\kokasoto\NPh40TBSU\_ver2 1H  
 COMMENT 1H 4-O-nPh-tris-TBS-U  
 DATEIN Thu Jul 19 15:43:59 2001  
 ORNUC 1H  
 EXMCO NON  
 OFPRQ 270.05 MHz  
 OESST 112.00 KHz  
 OFBIN 5800.0 Hz  
 POINT 16384  
 FREQU 5402.4 Hz  
 SCANS 8  
 ACQTM 3.033 sec  
 PD 0.935 sec  
 PUL 5.1 us  
 LENUC 1H  
 CTMP 26.9 c  
 SLWT CDCL3  
 EXREF 0.00 ppm  
 BF 0.20 Hz  
 RGAIN 17

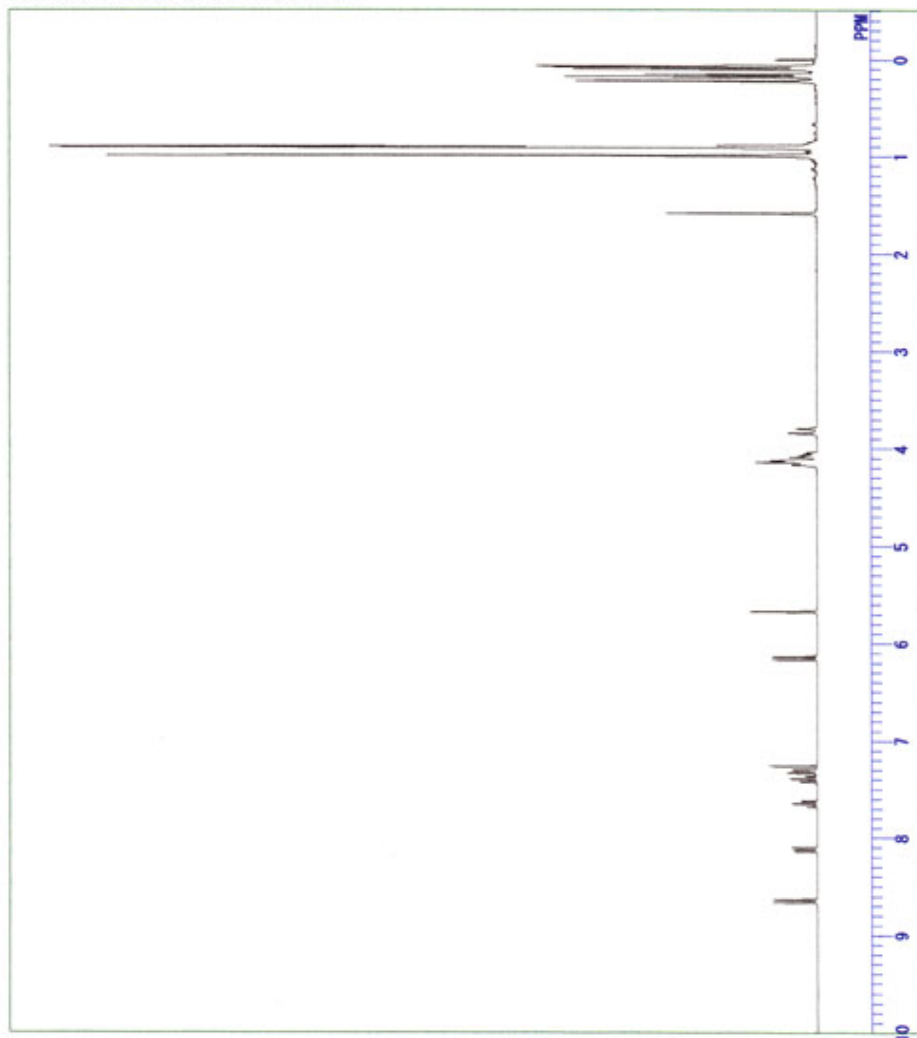

<sup>1</sup>H NMR spectrum

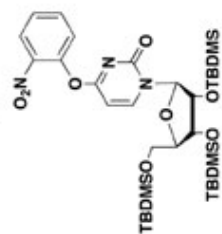

DFILE C:\My Documents\Kokamoto\YnPh\40TESU\_v  
 COUNT 13C 4-O-nPh-tris-TBS-U  
 DATIM Thu Jul 19 16:18:17 2001  
 GBNUC 13C  
 EXM00 BOM  
 OFREQ 67.80 MHz  
 ORSET 135.00 KHz  
 OFPIN 5200.0 Hz  
 POINT 32768  
 FREQ 18315.0 Hz  
 SCANS 500  
 ACQTM 1.789 sec  
 PD 1.211 sec  
 PW1 4.4 us  
 IRNUC 1H  
 CTEMP 25.3 c  
 CDCL3  
 SLVNT  
 EXREF 77.00 ppm  
 BF 0.20 Hz  
 RGAIN 31

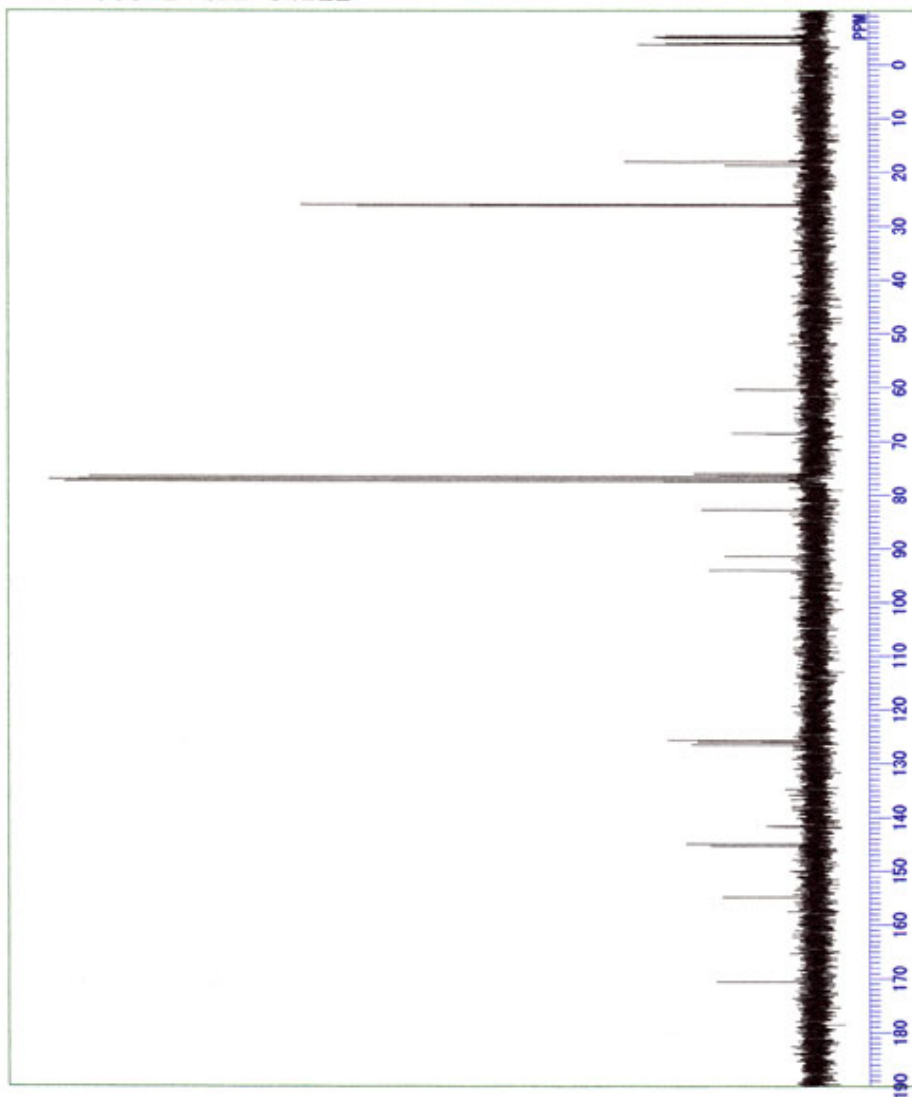

<sup>13</sup>C NMR spectrum

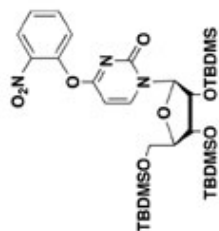



DFILE C:\My Documents\Yokamoto\Ph40TBSU 13

CONNT Wed Aug 01 12:03:57 2001

DATIM 13C

OBNUC 13C

EXM00 BCM

GBFRO 67.80 MHz

GBSET 135.00 KHz

GBFIN 5200.0 Hz

POINT 32768

FREQU 18315.0 Hz

SCANS 1000

ACQTM 1.789 sec

PD 1.211 sec

PW1 4.4 us

IRNUC 1H

CTEMP 25.8 C

CDCL3

SLVNT 77.00 ppm

EXREF 0.20 Hz

BF 32

RGAIN

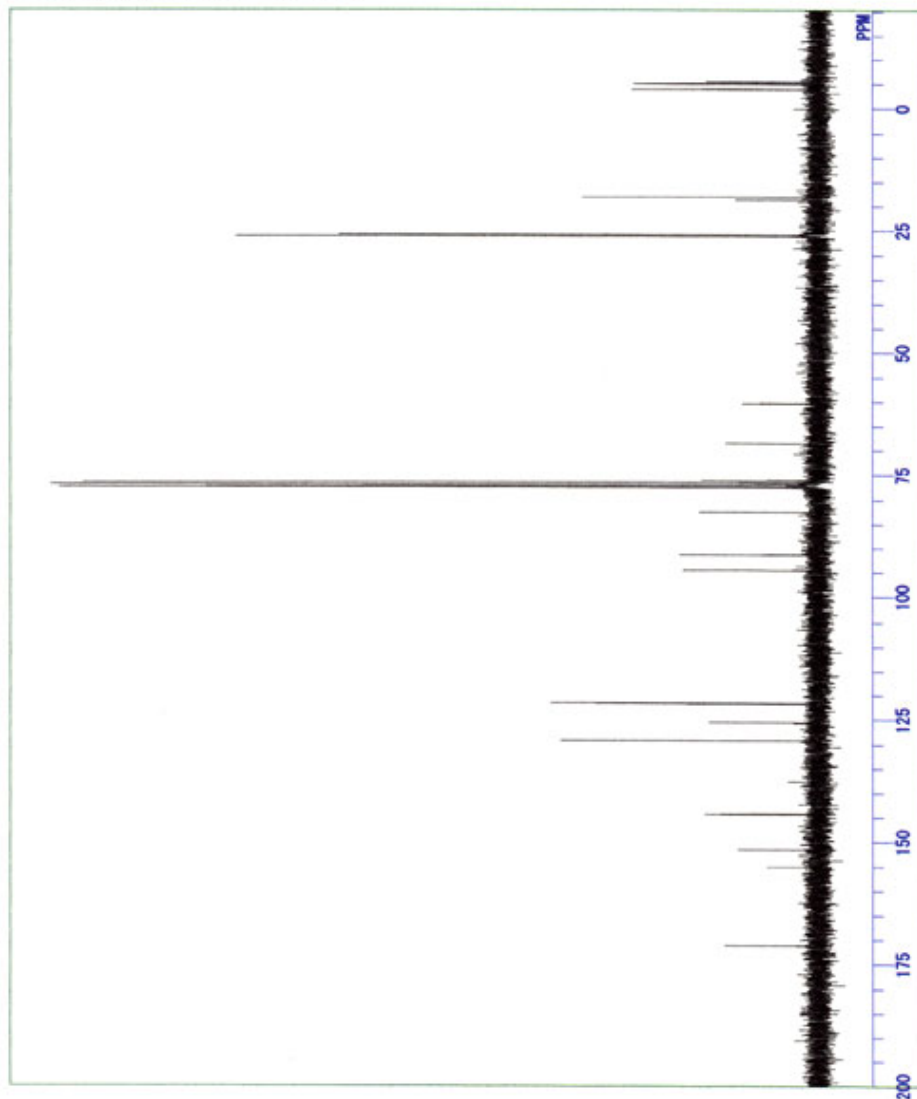

<sup>13</sup>C NMR spectrum

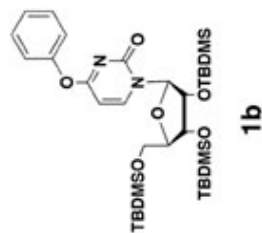





DFILE C:\My Documents\Yokamoto\c1PH40TBSU  
 COMNT  
 DATIM Tue May 13 19:53:30 2003  
 CNUC 13C  
 EXMOD BCM  
 OFREQ 67.80 MHz  
 OBSET 135.00 KHz  
 OFPIN 5200.0 Hz  
 POINT 32768  
 FREOU 18315.0 Hz  
 SCANS 753  
 ACQTM 1.789 sec  
 PD 1.211 sec  
 PWT 4.4 us  
 1H  
 IRNUC 22.6 c  
 CTMP CDCL3  
 SLVNT  
 EXREF 77.00 ppm  
 BF 0.20 Hz  
 RGAIN 27

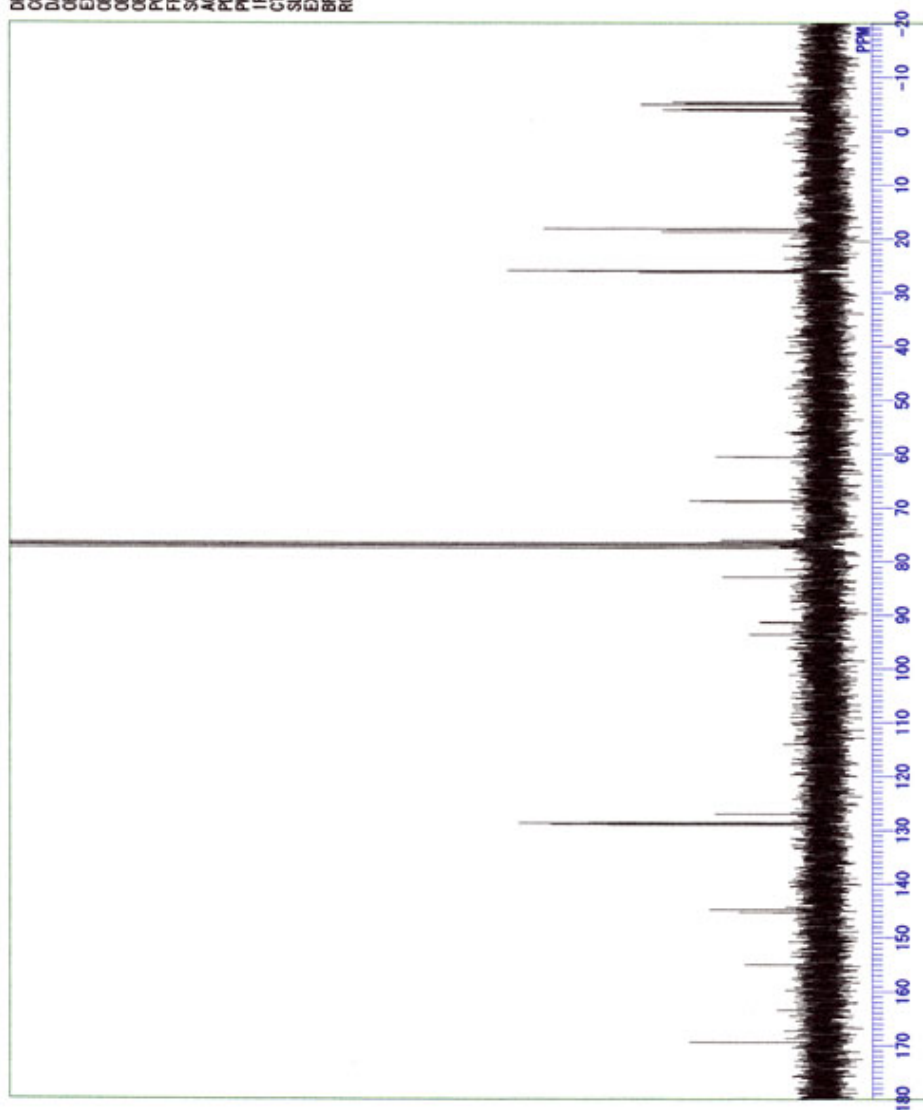

<sup>13</sup>C NMR spectrum

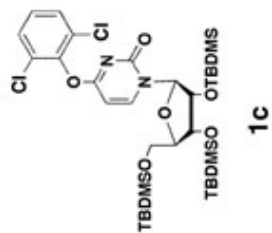

D:\FILE C:\My Documents\Yokamoto\ddimethyl\Ph40TBSU.  
 COMINT Mon Aug 13 12:13:02 2001  
 DATIN 1H  
 GENUC 1H  
 EXMOD NON  
 OFFRQ 270.05 MHz  
 OFSET 112.00 KHz  
 OFFIN 58600.0 Hz  
 POINT 16384  
 FREQU 5402.4 Hz  
 SCANS 8  
 ACQTM 3.033 sec  
 PD 0.935 sec  
 PW1 5.1 us  
 1H 27.6 c  
 IIRNUC COOL3  
 CTEMP 7.24 ppm  
 SLVNT EXREF  
 BF 1.20 Hz  
 RGAIN 14

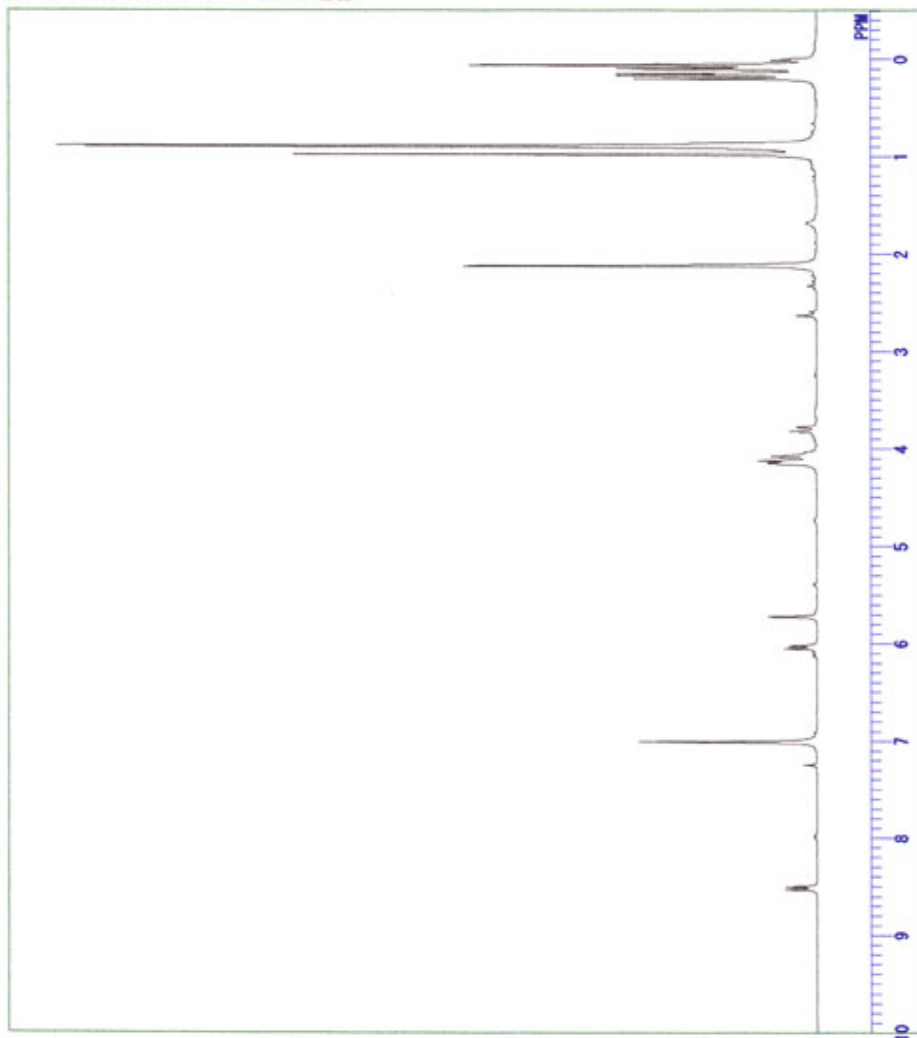

<sup>1</sup>H NMR spectrum

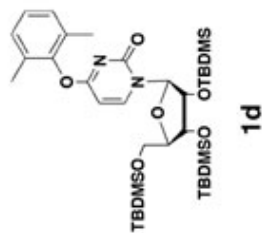

DF:FILE C:\Nly Documents\Kokamoto\dimethylPh4

COMINT

DATIM

ORNUC

EXMDO

ORFRO

ORSET

ORFIN

POINT

FREQD

SCANS

ACQTM

PD

PW1

IRNUC

CTEMP

SLVNT

EXREF

BF

RGAIN

Tue May 13 14:26:31 2003

13C

BCM

67.80 MHz

135.00 KHz

5200.0 Hz

32768

18315.0 Hz

220

1.789 sec

1.211 sec

4.4 us

1H

23.2 c

CDCL3

77.00 ppm

0.20 Hz

27

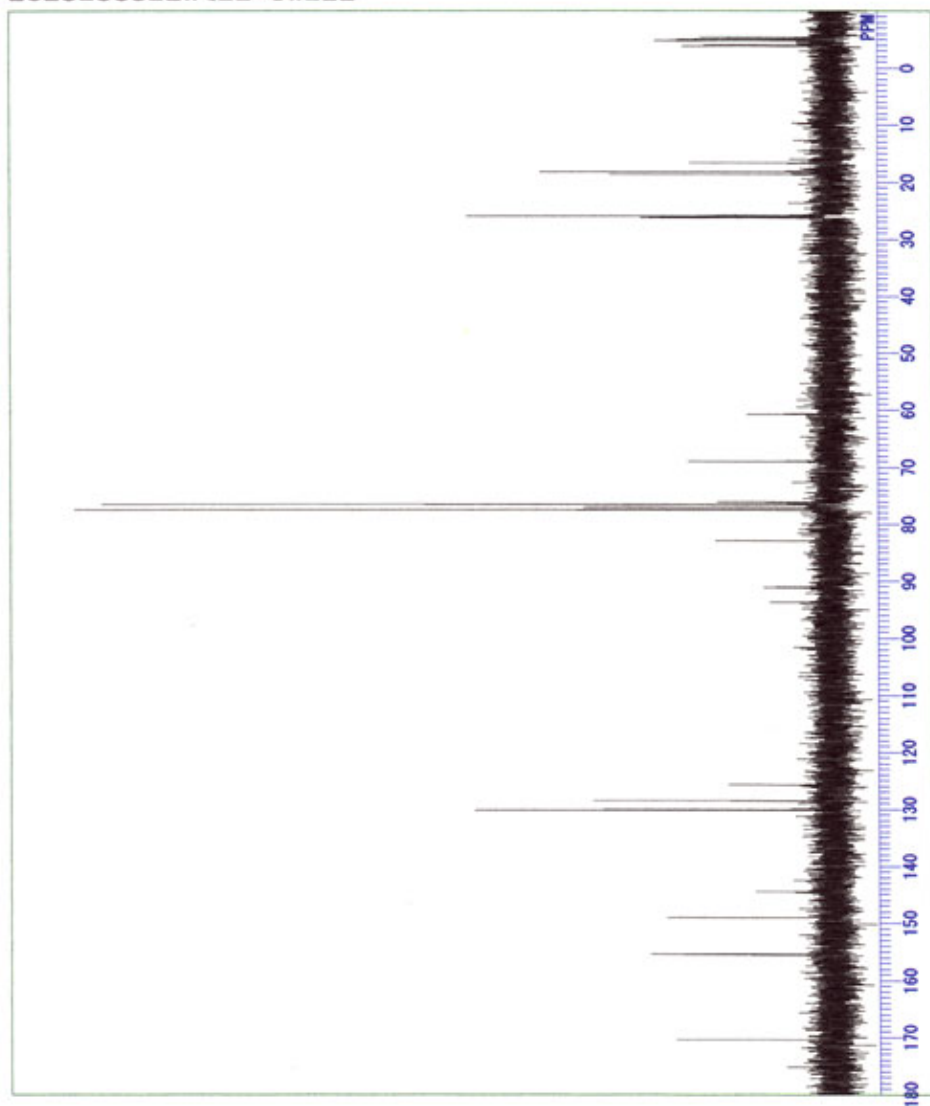

<sup>13</sup>C NMR spectrum

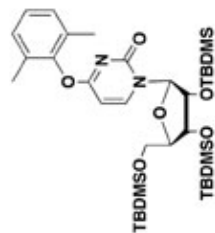

1d



C:\My Documents\kokamotol\2'-O-R 42

DFILE  
COMNT  
DATIM  
OBNUC  
EXMOD  
OBFRQ  
OBSET  
OBFIN  
POINT  
FREQU  
SCANS  
AQTM  
PD  
PWI  
IRNUC  
CTEMP  
SLVMT  
EXREF  
BF  
RGAIN

Tue Jun 10 10:03:03 2003  
13C  
BCM

67.80 MHz  
135.00 KHz  
5200.0 Hz  
32768  
18315.0 Hz  
14653  
1.789 sec  
1.211 sec  
5.2 us  
1H  
23.8 c  
CDCL3  
77.00 ppm  
0.00 Hz  
28

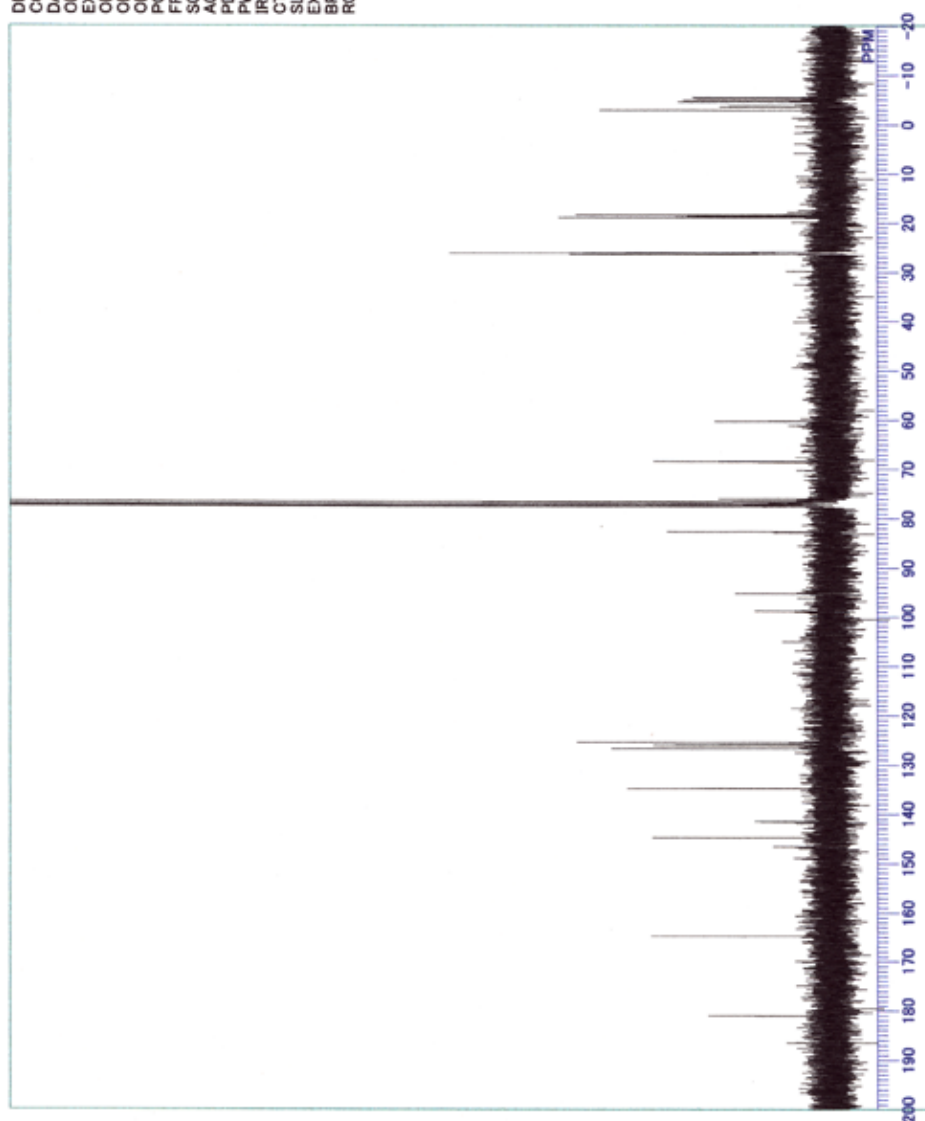

<sup>13</sup>C NMR spectrum

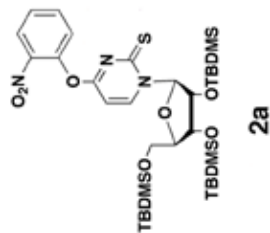

2a

D:\My Documents\Yokamoto\Ph40PSS-2U sem1-pi  
 COMNT Fri Jun 22 19:05:24 2001  
 DATIM 1H  
 CBNUC 1H  
 EXMOD NON  
 OBFO 270.05 MHz  
 OBSE 112.00 KHz  
 OBFL 5800.0 Hz  
 POINT 16384  
 FREQ 5402.4 Hz  
 SCANS 32  
 ACQTM 3.033 sec  
 PD 0.935 sec  
 PW1 5.1 us  
 IRNUC 1H  
 CTEMP 24.7 c  
 SOLV CCL3  
 SLVNT  
 EXREF 7.24 ppm  
 BF 0.20 Hz  
 RGAIN 15

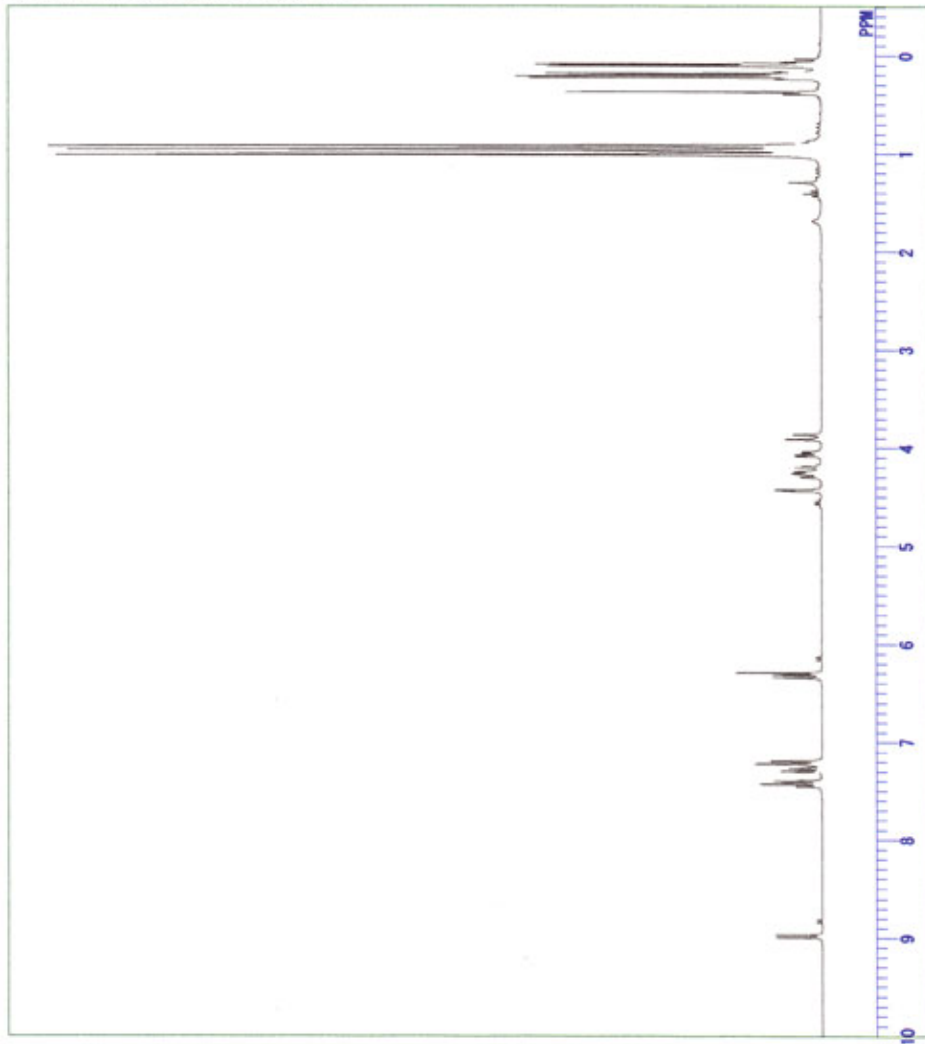

<sup>1</sup>H NMR spectrum

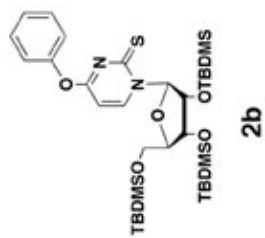

DF-FILE C:\My Documents\Yokamoto\Ph40P8s2U  
 COMMENT 13C BOM Ph40TBS-e2U  
 DATIM Fri Jun 22 19:45:55 2001  
 OBNUC 13C

EXMOD BOM 67.80 MHz  
 OBPRO 135.00 KHz  
 OBSET 5200.0 Hz  
 OBFIN 32768  
 POINT 18315.0 Hz  
 FREQU 250  
 SCANS 1.789 sec  
 ACQTM 1.211 sec  
 PD 4.4 us  
 PWT 1H  
 IRNUC 25.2 c  
 CTMP CDCL3  
 SLVNT 77.00 ppm  
 EXREF 0.20 Hz  
 BF 31  
 RGAIN

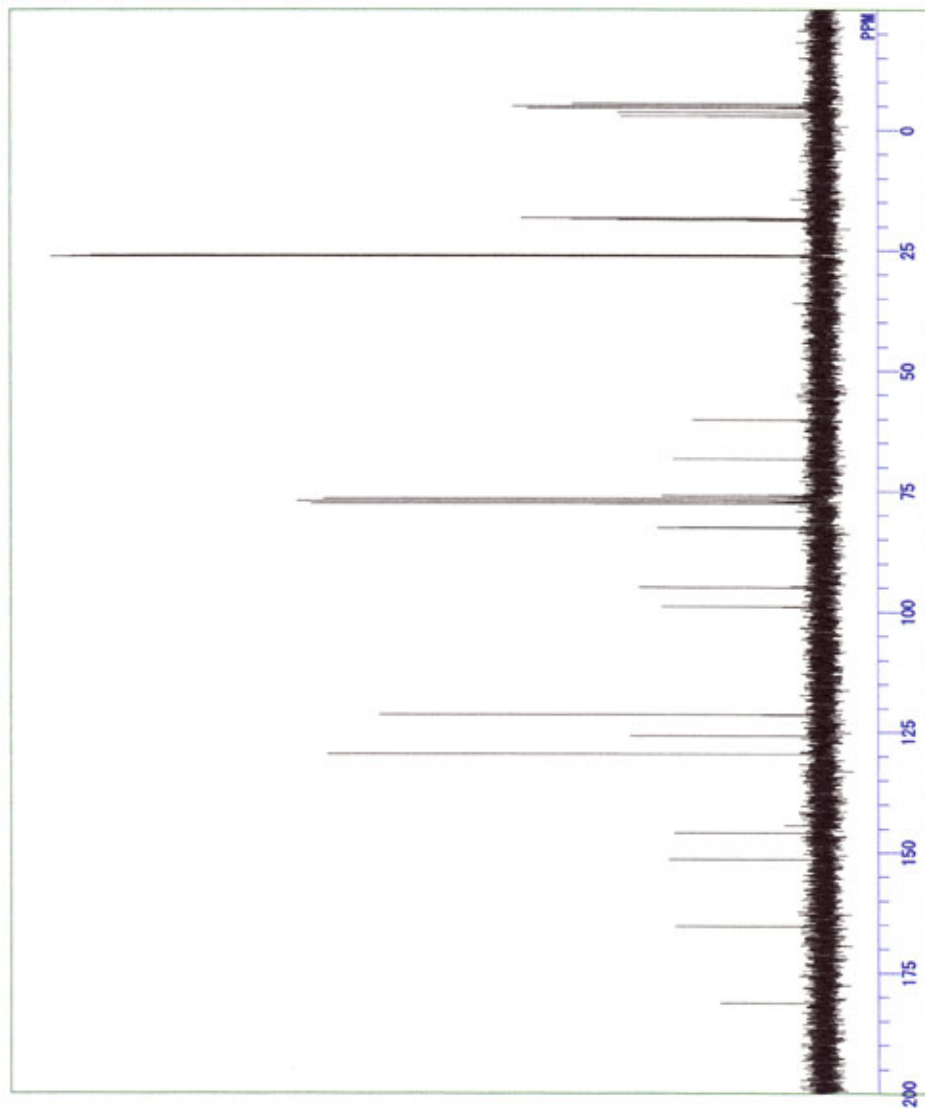

<sup>13</sup>C NMR spectrum

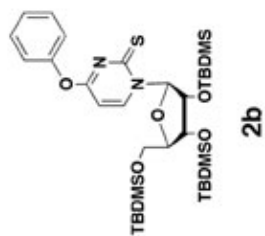





C:\My Documents\Yokamoto\ClPh40TBSs2  
 4-O-2,6-dichlorophenyl-tris-TBS-s2U  
 DATIM Fri Aug 10 16:21:22 2001  
 OBNUC 13C  
 EXMUD BCM

GPRQ 67.80 MHz  
 GPRQ 135.00 MHz  
 GPRQ 5200.0 Hz  
 GPRQ 32768  
 POINT 18315.0 Hz  
 FREQ 1000  
 SCANS 1.789 sec  
 ACQTM 1.211 sec  
 PD 4.4 us  
 PW1 1H  
 IRNUC 25.8 c  
 CTEMP CDCL3  
 SLVNT 77.00 ppm  
 EXREF 0.20 Hz  
 BF 31  
 RGAIN

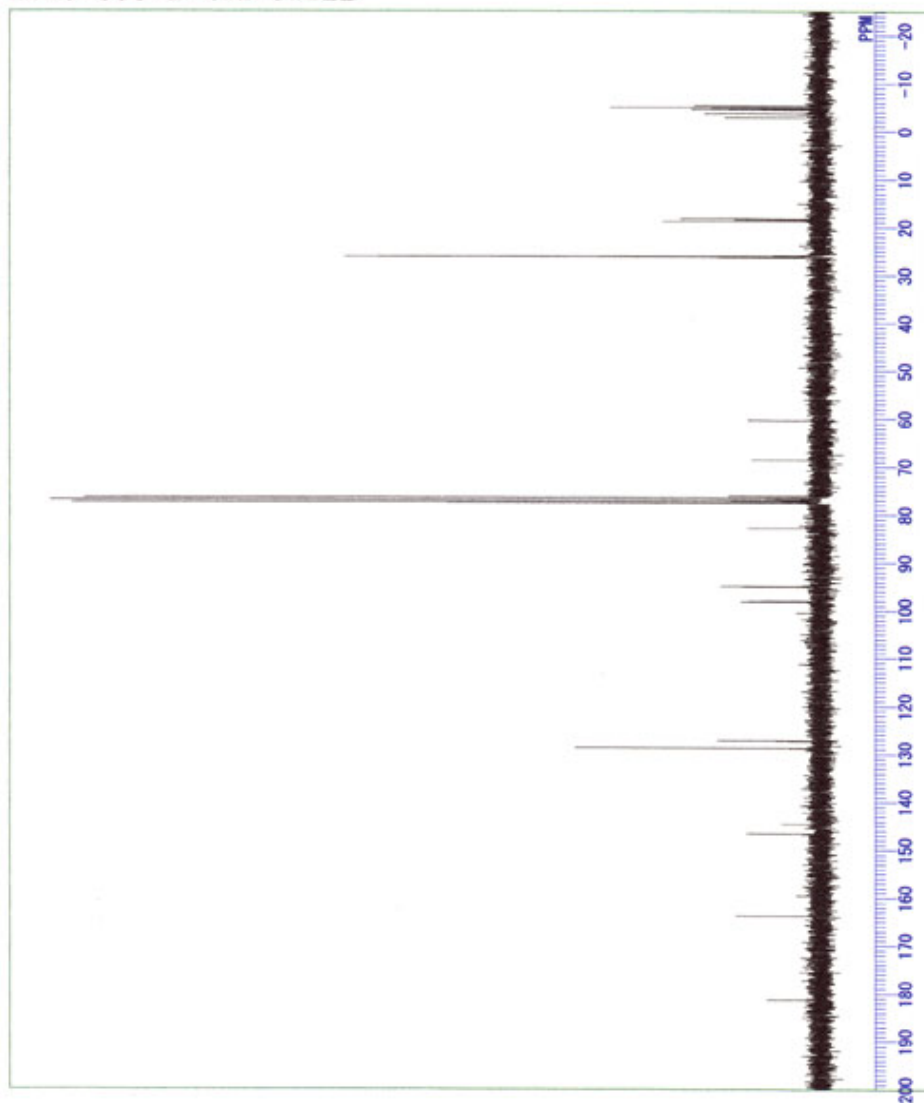

<sup>13</sup>C NMR spectrum

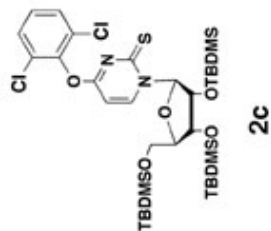

DFILE C:\My Documents\Kokamoto\dimethyl\Ph4OTBS s

COMMIT  
DATIM  
GENUC 1H  
EXMOD NOM  
OFPRO 270.05 MHz  
OBSET 112.00 KHz  
OFIN 5800.0 Hz  
POINT 16384  
FREQ 5402.4 Hz  
SCANS 40  
ACQTM 3.032 sec  
PD 3.967 sec  
PUL 5.1 us  
IRNUC 1H  
CTEMP 23.5 c  
SLVNT CDCL3  
EXREF 0.00 ppm  
BF 0.20 Hz  
RGAIN 15

Thu May 22 19:40:05 2003

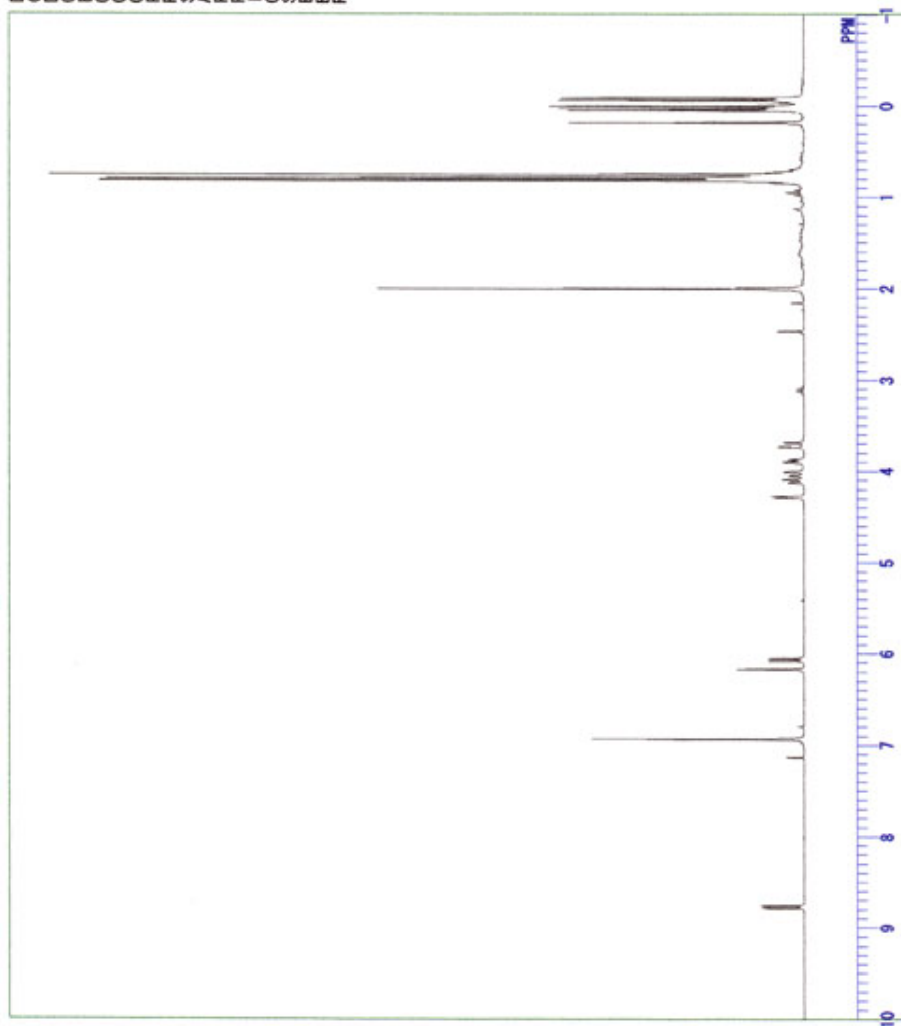

<sup>1</sup>H NMR spectrum

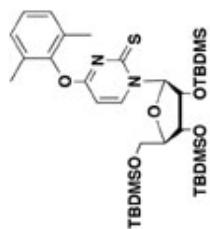

C:\My Documents\Kokanoto\dimethyl IPH4

COMET  
DATUM  
13C  
EXMOD  
BOM  
67.80 MHz  
135.00 KHz  
5200.0 Hz  
32768  
POINT  
18315.0 Hz  
FREQ  
100  
SCANS  
1.789 sec  
ACQTM  
1.211 sec  
PD  
4.4 us  
PWI  
1H  
IRNUC  
23.5 c  
CTEMP  
COOL3  
SLVNT  
EXREF  
BF  
RGAIN  
77.00 ppm  
0.20 Hz  
27

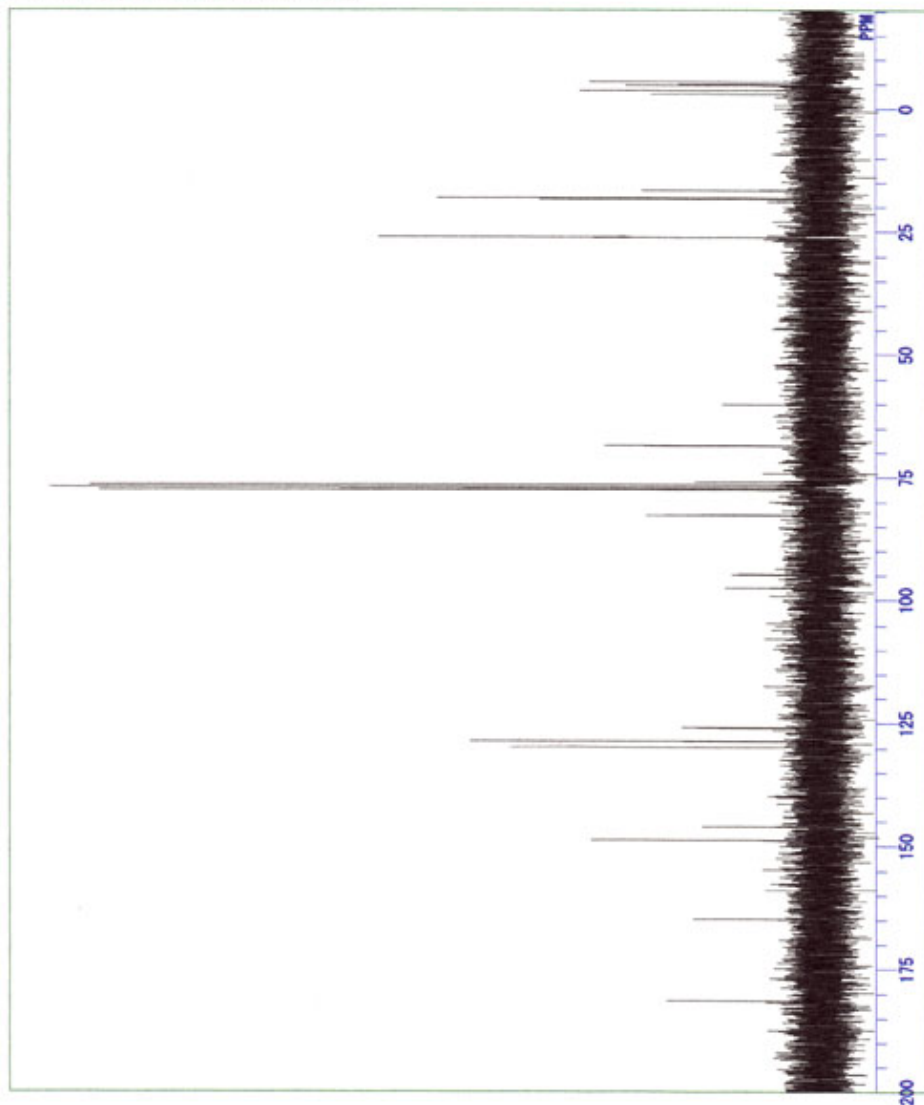

<sup>13</sup>C NMR spectrum

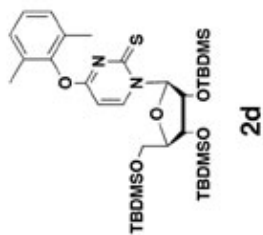

08-JUN-00 11:48:33  
 DFILE PYP1  
 ORNUC 1H  
 EXMOD NON  
 OFR 270.05 MHz  
 OBSET 112.00 kHz  
 OBFIN 5800.0 Hz  
 POINT 32768  
 FREQU 5405.4 Hz  
 SCANS 16  
 ACQTH 3.031 sec  
 PD 3.969 sec  
 PM1 5.2 us  
 IRNUC 1H  
 CTEMP 24.7 c  
 SLVNT CDCL3  
 EXREF 7.24 ppm  
 BF 0.15 Hz  
 RGAIN 16  
 OPERATOR :

<sup>1</sup>H NMR spectrum

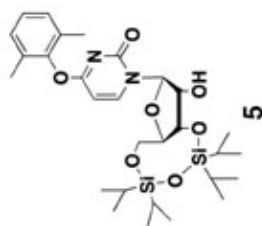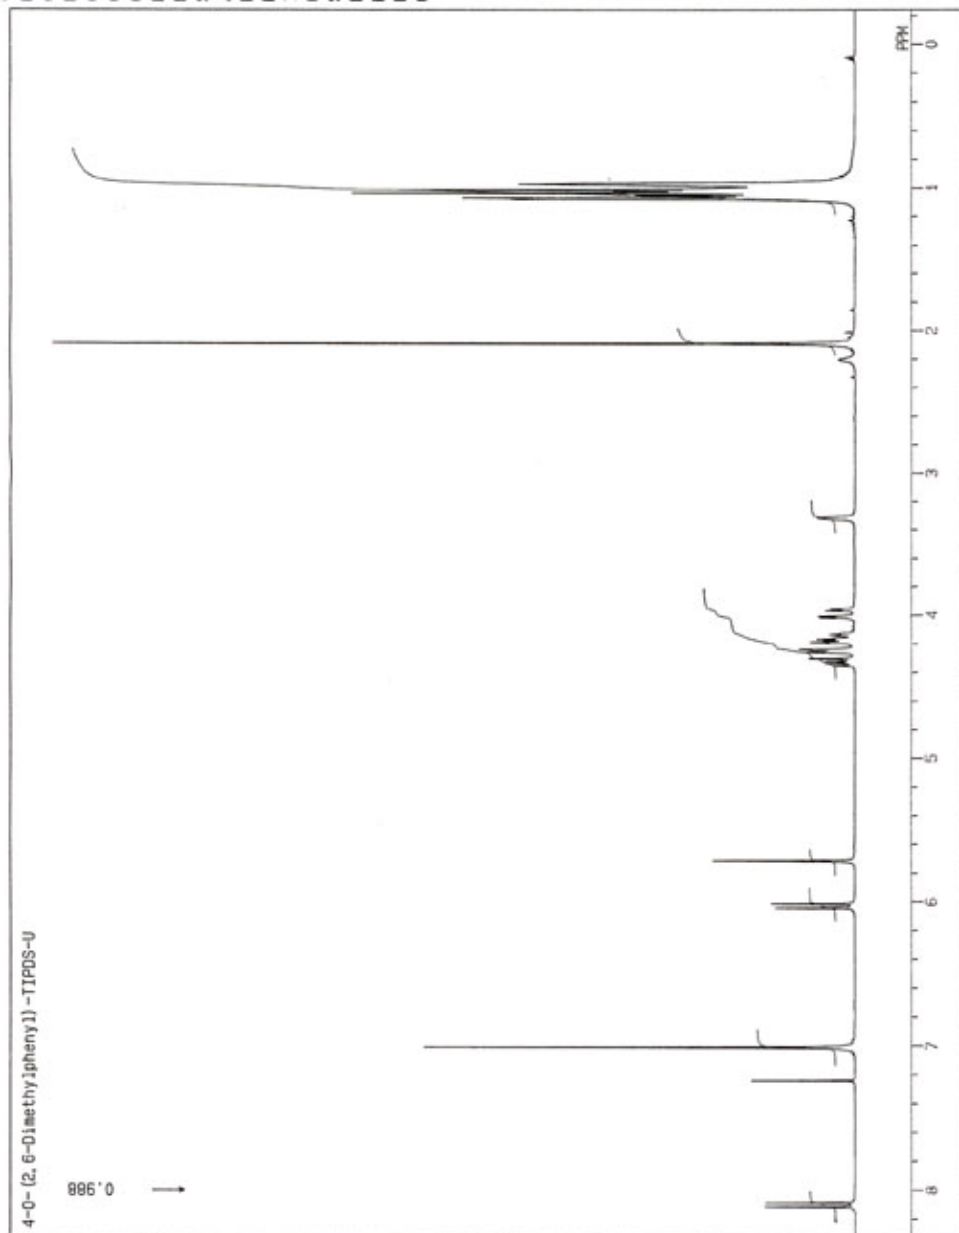

09-JUN-00 12:44:43  
 DF FILE P2039H  
 OBNUC 13C  
 EXMOD BCM  
 QFR 67.80 MHz  
 OBSET 135.00 kHz  
 OBFIN 5200.0 Hz  
 POINT 32768  
 FREQW 20000.0 Hz  
 SCANS 477  
 ACQTM 0.819 sec  
 PD 2.181 sec  
 PW1 4.4 us  
 IRNUC 1H  
 CTMP 28.6 c  
 SLVNT CDCL3  
 EXREF 77.00 ppm  
 BF 1.22 Hz  
 PSAIN 24  
 OPERATOR :

<sup>13</sup>C NMR spectrum

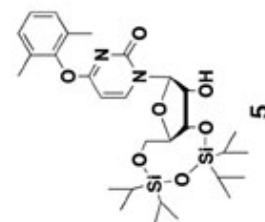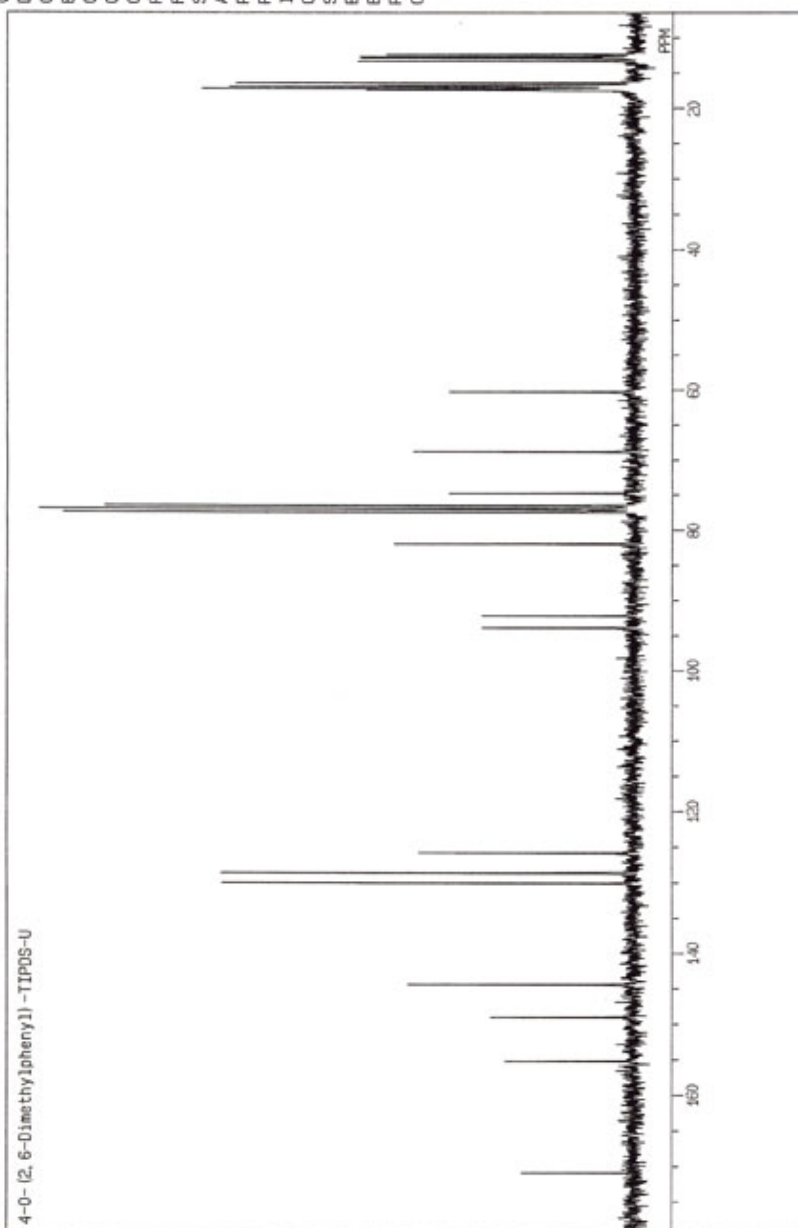

10-JUN-00 01:48:08  
 OFILE P2041H  
 OBNUC 1H  
 EXM00 NON  
 OFR 270.05 MHz  
 OBSET 112.00 KHz  
 OBFIN 5800.0 Hz  
 POINT 32768  
 FREQU 5405.4 Hz  
 SCANS 16  
 ACQTM 3.031 sec  
 PD 3.969 sec  
 PW1 5.2 us  
 IRNUC 1H  
 CTEMP 25.2 c  
 SLVNT CDCL3  
 EXREF 0.00 ppm  
 BF 0.16 Hz  
 RGAIN 20  
 OPERATOR :

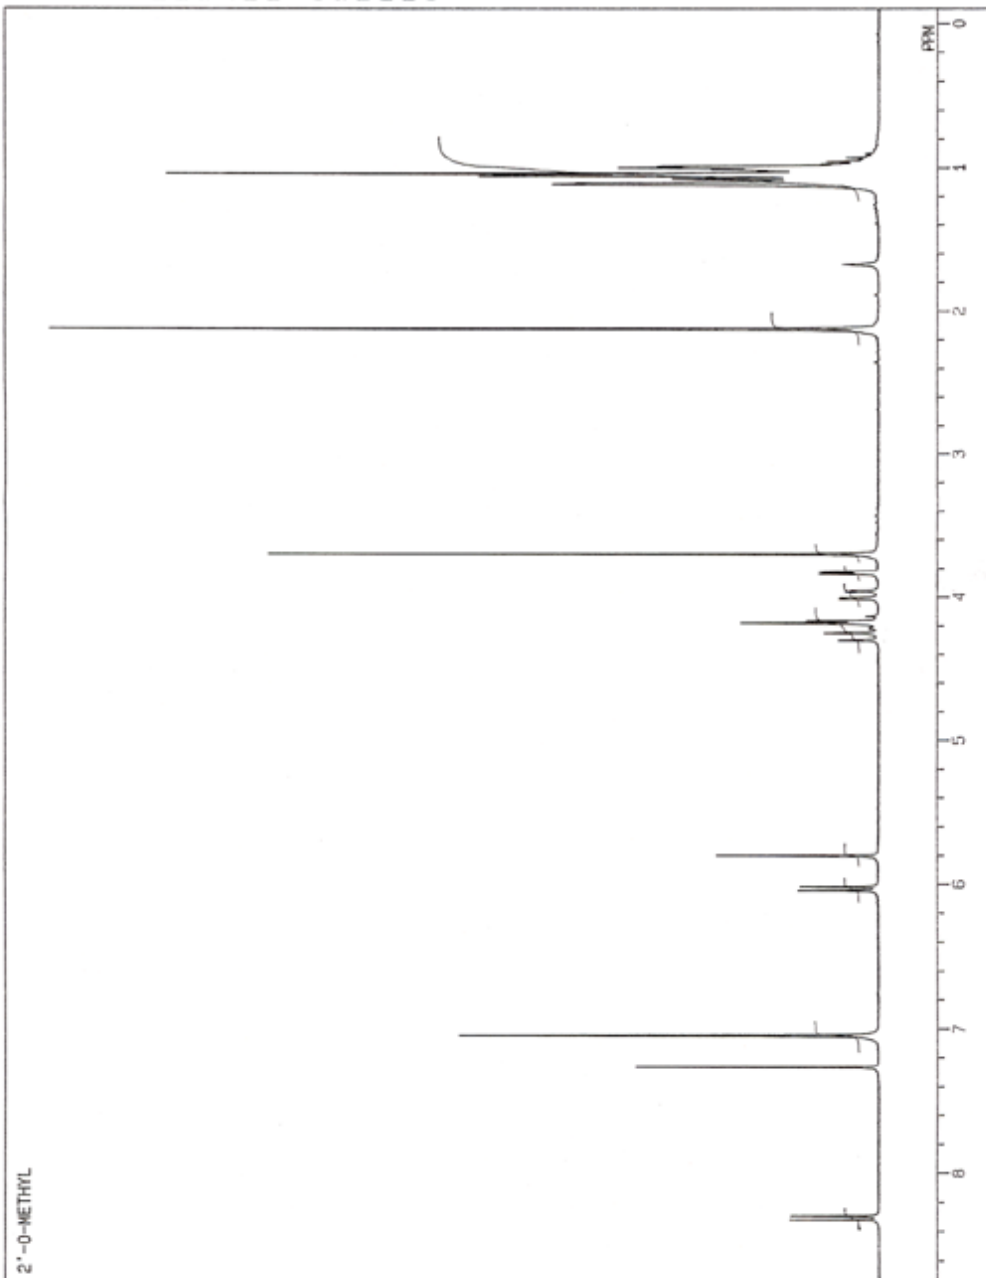

<sup>1</sup>H NMR spectrum

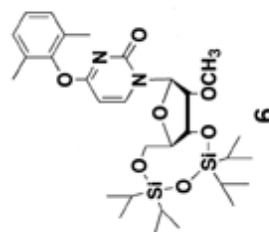

10-JUN-00 01:48:08  
 DFIL P2041H  
 OBNUC 13C  
 EXMOD BCM  
 OFR 67.80 MHz  
 OBSET 135.00 kHz  
 OBFIN 5200.0 Hz  
 POINT 32768  
 FREQU 20000.0 Hz  
 SCANS 493  
 ACQTM 0.819 sec  
 PD 2.181 sec  
 PW1 4.4 US  
 IRRUC 1H  
 CTEMP 28.6 c  
 SLVNT CDCL3  
 EXREF 77.00 ppm  
 BF 1.22 Hz  
 RGAIN 24  
 OPERATOR :

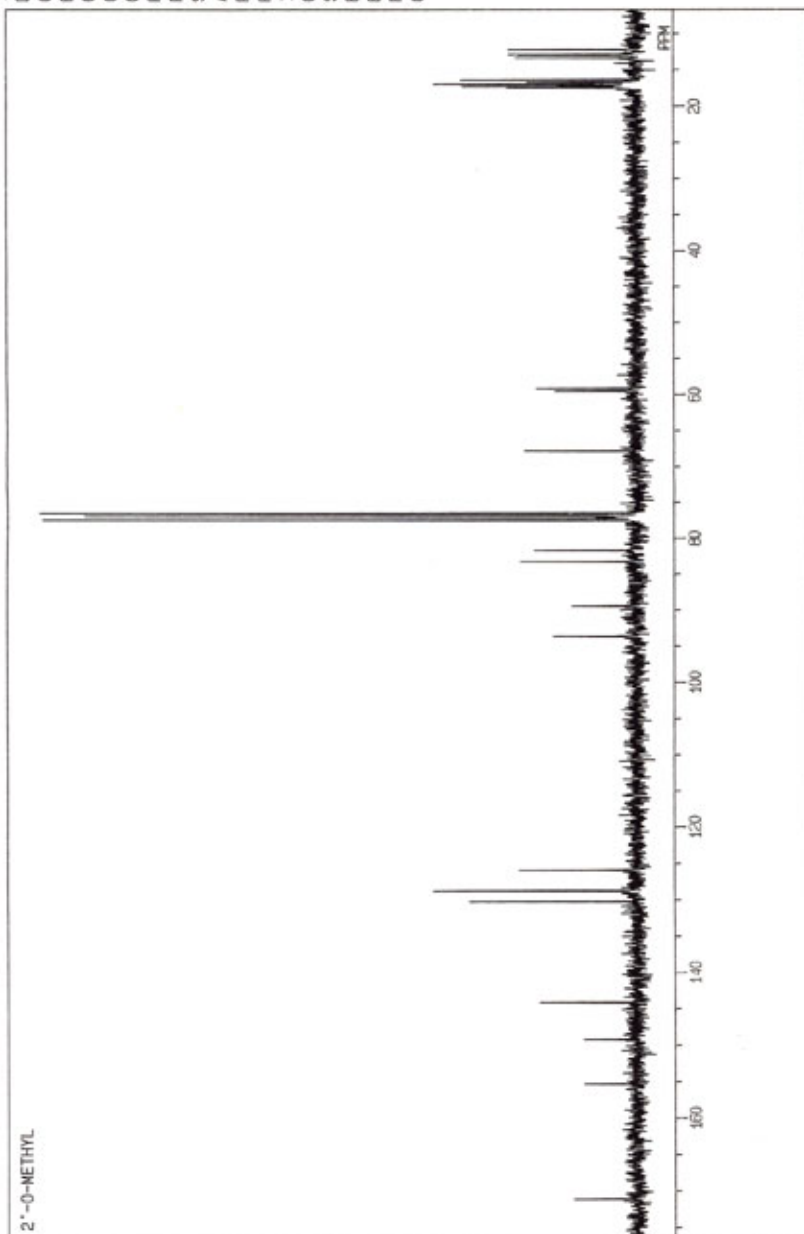

<sup>13</sup>C NMR spectrum

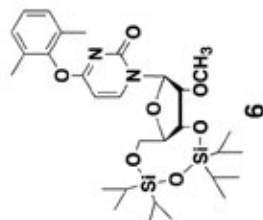



4-0- [2, 6-Dimethylphenyl] -TIPDS-s2Um\_1H

OFFICE P2046H

<sup>1</sup>H NMR (400 MHz, CDCl<sub>3</sub>) δ 7.25 (d, 2H, H<sub>A</sub>), 7.15 (d, 2H, H<sub>B</sub>), 6.85 (d, 2H, H<sub>C</sub>), 6.75 (d, 2H, H<sub>D</sub>), 6.65 (d, 2H, H<sub>E</sub>), 6.55 (d, 2H, H<sub>F</sub>), 6.45 (d, 2H, H<sub>G</sub>), 6.35 (d, 2H, H<sub>H</sub>), 6.25 (d, 2H, H<sub>I</sub>), 6.15 (d, 2H, H<sub>J</sub>), 6.05 (d, 2H, H<sub>K</sub>), 5.95 (d, 2H, H<sub>L</sub>), 5.85 (d, 2H, H<sub>M</sub>), 5.75 (d, 2H, H<sub>N</sub>), 5.65 (d, 2H, H<sub>O</sub>), 5.55 (d, 2H, H<sub>P</sub>), 5.45 (d, 2H, H<sub>Q</sub>), 5.35 (d, 2H, H<sub>R</sub>), 5.25 (d, 2H, H<sub>S</sub>), 5.15 (d, 2H, H<sub>T</sub>), 5.05 (d, 2H, H<sub>U</sub>), 4.95 (d, 2H, H<sub>V</sub>), 4.85 (d, 2H, H<sub>W</sub>), 4.75 (d, 2H, H<sub>X</sub>), 4.65 (d, 2H, H<sub>Y</sub>), 4.55 (d, 2H, H<sub>Z</sub>), 4.45 (d, 2H, H<sub>AA'</sub>), 4.35 (d, 2H, H<sub>AB'</sub>), 4.25 (d, 2H, H<sub>AC'</sub>), 4.15 (d, 2H, H<sub>AD'</sub>), 4.05 (d, 2H, H<sub>AE'</sub>), 3.95 (d, 2H, H<sub>AF'</sub>), 3.85 (d, 2H, H<sub>AG'</sub>), 3.75 (d, 2H, H<sub>AH'</sub>), 3.65 (d, 2H, H<sub>AI'</sub>), 3.55 (d, 2H, H<sub>AJ'</sub>), 3.45 (d, 2H, H<sub>AK'</sub>), 3.35 (d, 2H, H<sub>AL'</sub>), 3.25 (d, 2H, H<sub>AM'</sub>), 3.15 (d, 2H, H<sub>AN'</sub>), 3.05 (d, 2H, H<sub>AO'</sub>), 2.95 (d, 2H, H<sub>AP'</sub>), 2.85 (d, 2H, H<sub>AQ'</sub>), 2.75 (d, 2H, H<sub>AR'</sub>), 2.65 (d, 2H, H<sub>AS'</sub>), 2.55 (d, 2H, H<sub>AT'</sub>), 2.45 (d, 2H, H<sub>AU'</sub>), 2.35 (d, 2H, H<sub>AV'</sub>), 2.25 (d, 2H, H<sub>AW'</sub>), 2.15 (d, 2H, H<sub>AX'</sub>), 2.05 (d, 2H, H<sub>AY'</sub>), 1.95 (d, 2H, H<sub>AZ'</sub>), 1.85 (d, 2H, H<sub>BA'</sub>), 1.75 (d, 2H, H<sub>BB'</sub>), 1.65 (d, 2H, H<sub>BC'</sub>), 1.55 (d, 2H, H<sub>BD'</sub>), 1.45 (d, 2H, H<sub>BE'</sub>), 1.35 (d, 2H, H<sub>BF'</sub>), 1.25 (d, 2H, H<sub>BG'</sub>), 1.15 (d, 2H, H<sub>BH'</sub>), 1.05 (d, 2H, H<sub>BI'</sub>), 1.00 (s, 3H, H<sub>CD</sub>), 0.95 (s, 3H, H<sub>CE</sub>), 0.90 (s, 3H, H<sub>CF</sub>), 0.85 (s, 3H, H<sub>CG</sub>), 0.80 (s, 3H, H<sub>CH</sub>), 0.75 (s, 3H, H<sub>CI</sub>), 0.70 (s, 3H, H<sub>CJ</sub>), 0.65 (s, 3H, H<sub>CK</sub>), 0.60 (s, 3H, H<sub>CL</sub>), 0.55 (s, 3H, H<sub>CM</sub>), 0.50 (s, 3H, H<sub>CN</sub>), 0.45 (s, 3H, H<sub>CO</sub>), 0.40 (s, 3H, H<sub>CP</sub>), 0.35 (s, 3H, H<sub>CQ</sub>), 0.30 (s, 3H, H<sub>CR</sub>), 0.25 (s, 3H, H<sub>CS</sub>), 0.20 (s, 3H, H<sub>CT</sub>), 0.15 (s, 3H, H<sub>CU</sub>), 0.10 (s, 3H, H<sub>CV</sub>), 0.05 (s, 3H, H<sub>CW</sub>), 0.00 (s, 3H, H<sub>CD</sub>).

EXMOD NON

OFA

085ET

08FIN

POINT

FREQ

SCANS

ACQTM

PD

PW1

TRANIC 4H

CTEMP

SL VNT COCL

EXAFS

TABLE 1

PGATN 1

OPERATOR :

REFERENCES:

<sup>1</sup>H NMR spectrum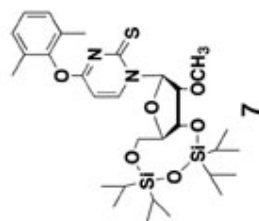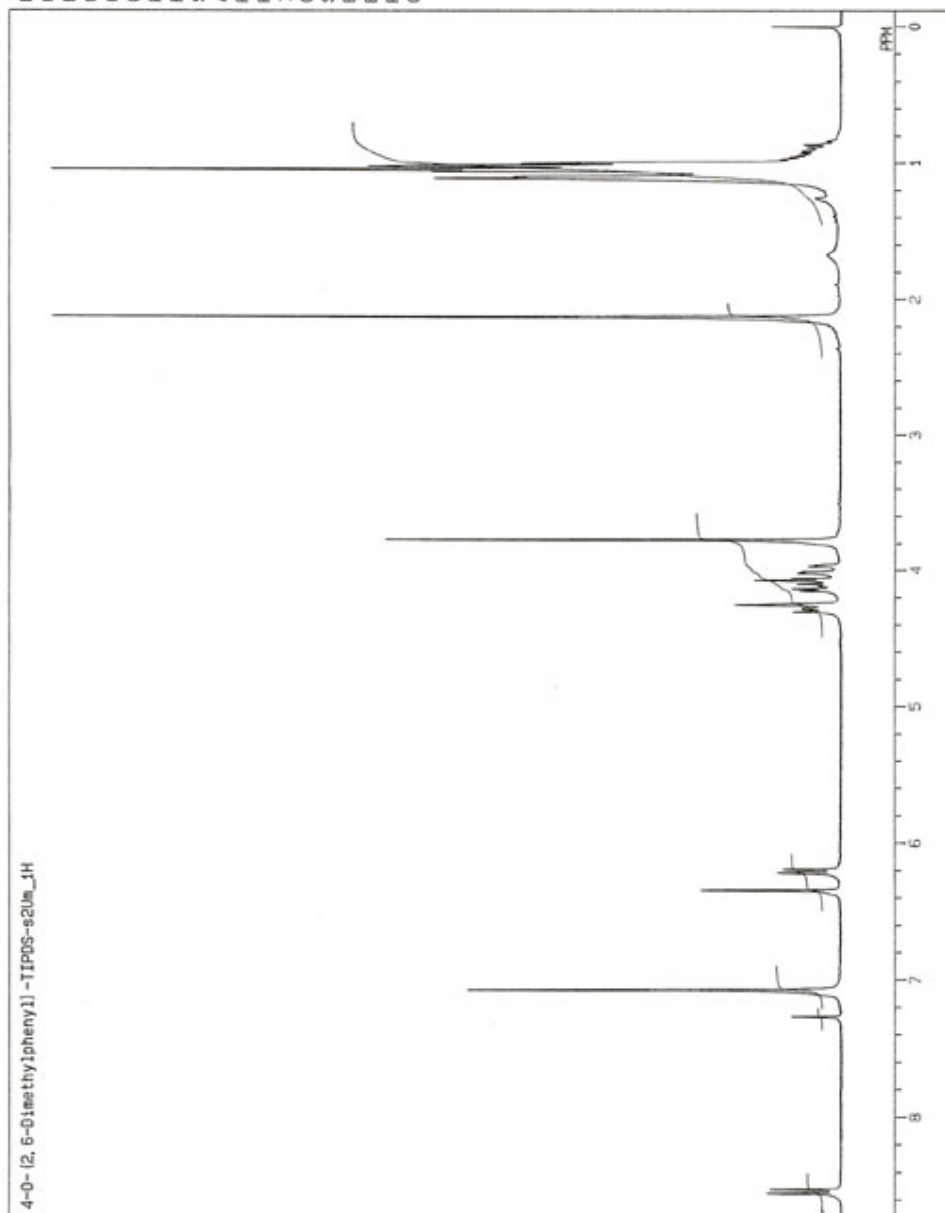

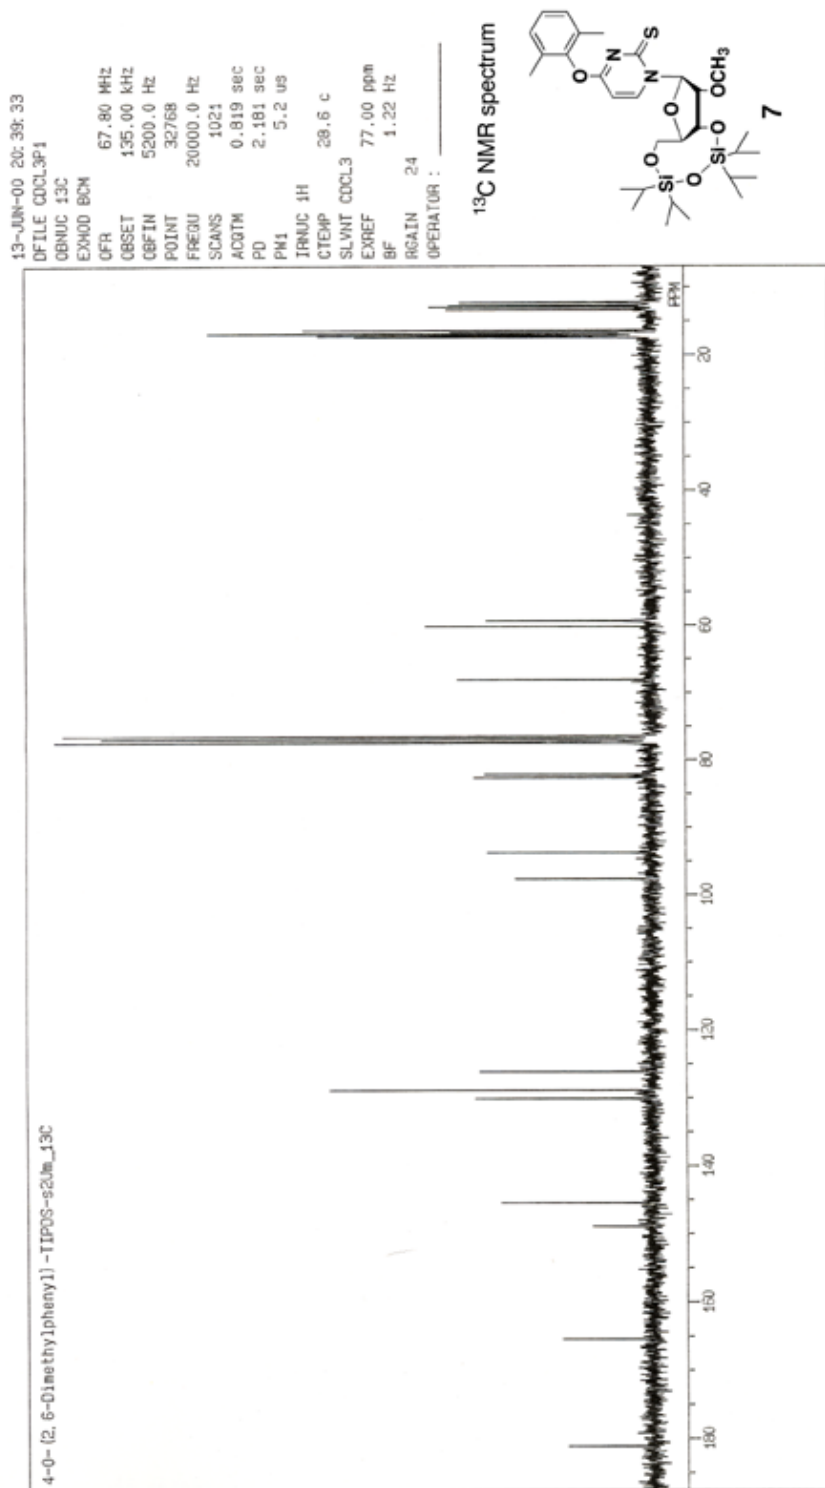

21-JUN-00 14:24:32  
 OFILE P2050HH  
 ORNUC 1H  
 EXM00 NON  
 OFR 270.05 MHz  
 OBSET 112.00 kHz  
 OFIN 5800.0 Hz  
 POINT 32768  
 FREQ 5405.4 Hz  
 SCANS 16  
 ACQTM 3.031 sec  
 PD 3.969 sec  
 PW1 5.2 us  
 IRNUC 1H  
 CTEMP 24.5 c  
 SLVNT CDCL3  
 EXREF 0.00 ppm  
 BF 0.16 Hz  
 RGAIN 18  
 OPERATOR :

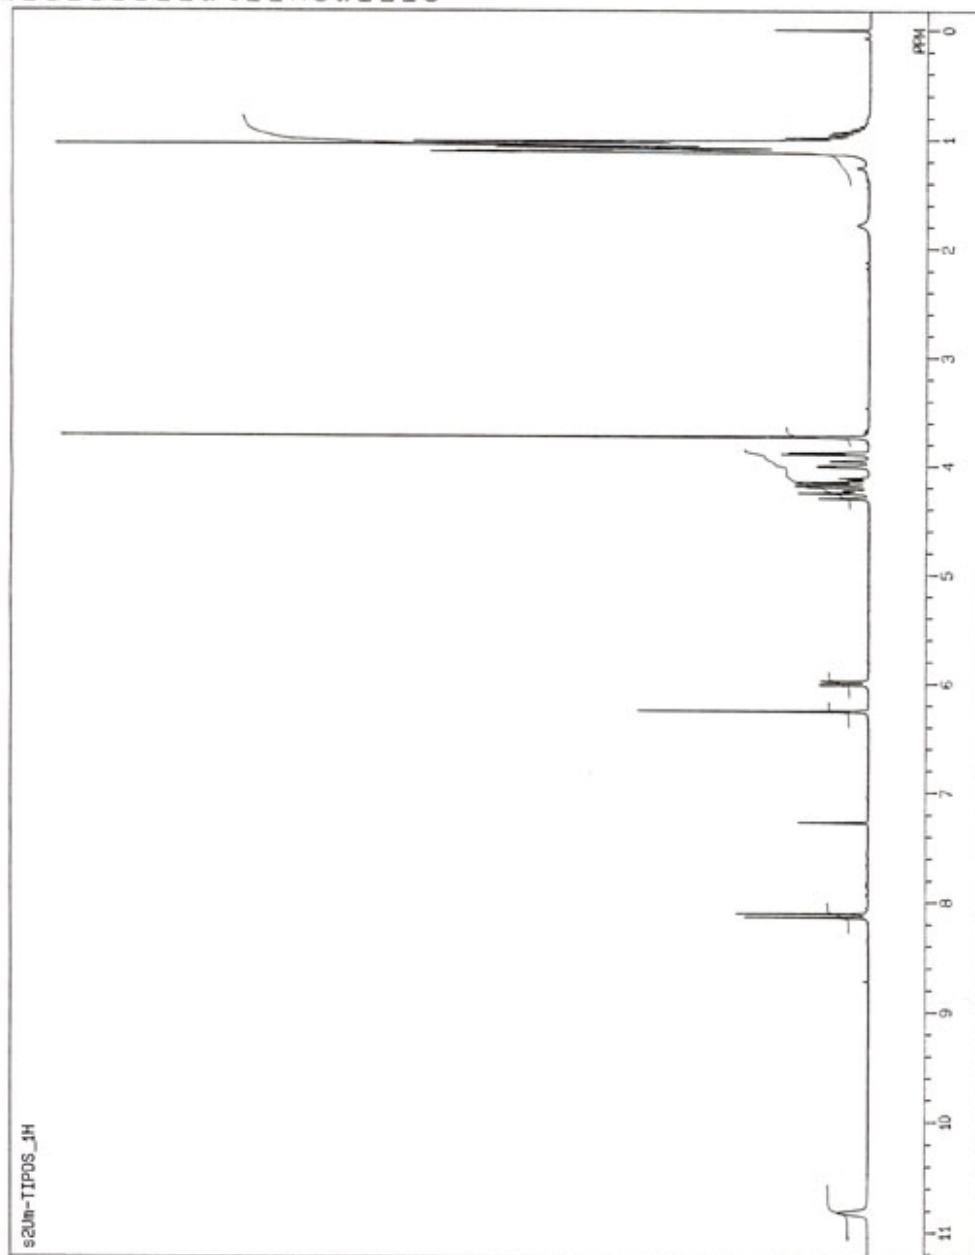

<sup>1</sup>H NMR spectrum

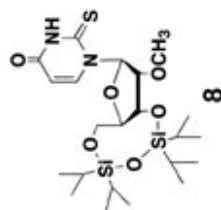

18-JUN-00 11:22:50  
 DF IL ASAI  
 QMUC 13C  
 EXMOD ECH  
 OFR 67.80 MHz  
 OSET 135.00 kHz  
 OFIN 5200.0 Hz  
 POINT 32768  
 FREQU 20000.0 Hz  
 SCANS 765  
 ACQTM 0.819 sec  
 PD 2.181 sec  
 PM1 5.2 us  
 IRMUC 1H  
 CTENP 28.6 c  
 SLVNT CDCL3  
 EXREF 77.00 ppm  
 BF 1.22 Hz  
 RGAIN 24  
 OPERATOR :

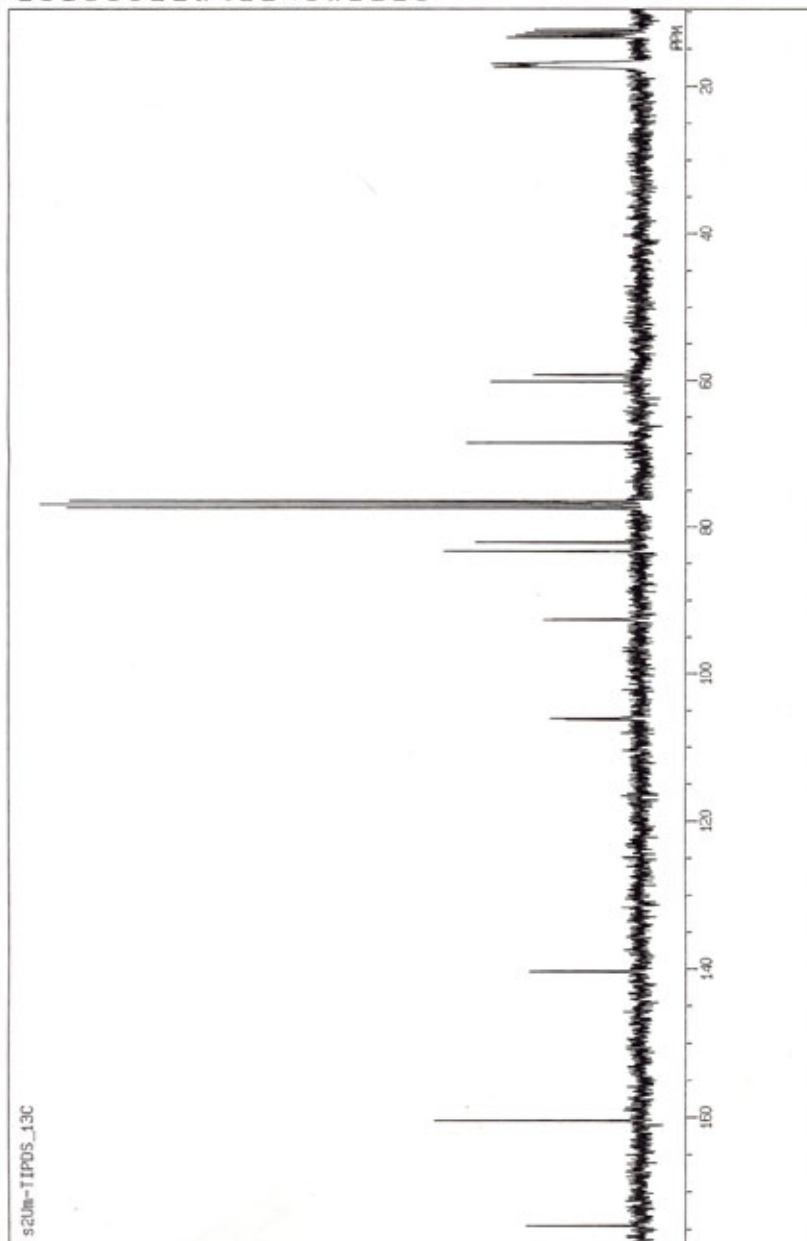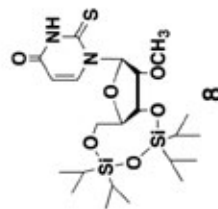

<sup>1</sup>H NMR spectrum

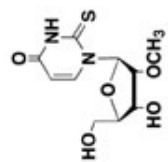

3b

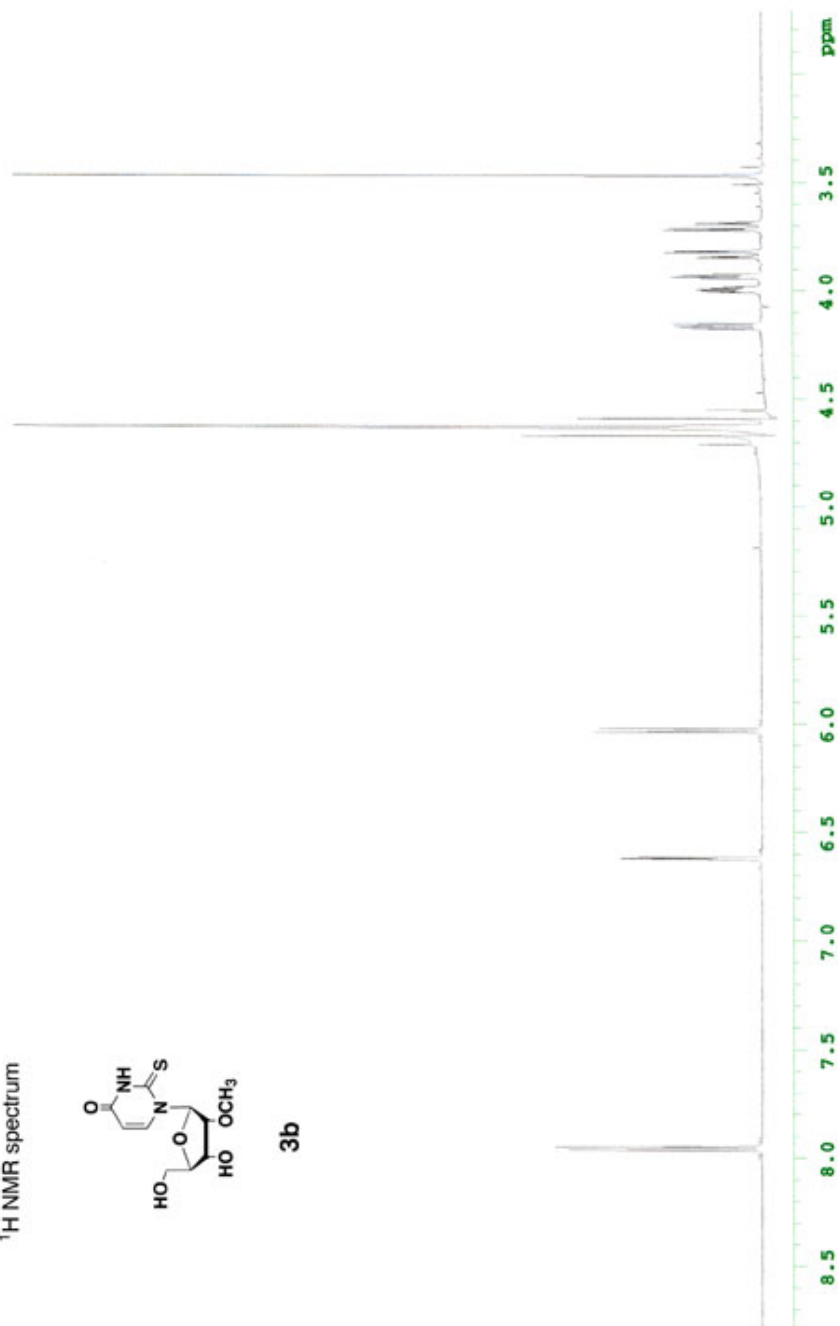

C:\WINNMR38\COMMON\DEFAULT.ALS

DFILE C:\WINNMR38\COMMON\DEFAULT.ALS

CONNT Tue Jul 22 16:28:55 2003

OBNUC 13C

EXMDO BOM

OBPRO 67.80 MHz

OBSET 135.00 KHz

OBFIN 5200.0 Hz

POINT 32768

FREQU 18315.0 Hz

SCANS 1480

ACQTM 1.789 sec

PD 1.211 sec

PW1 4.4 us

IRNUC 1H

CTEMP 27.2 C

SLVNT DMSO

EXREF 39.50 ppm

BF 0.20 Hz

RGAIN 27

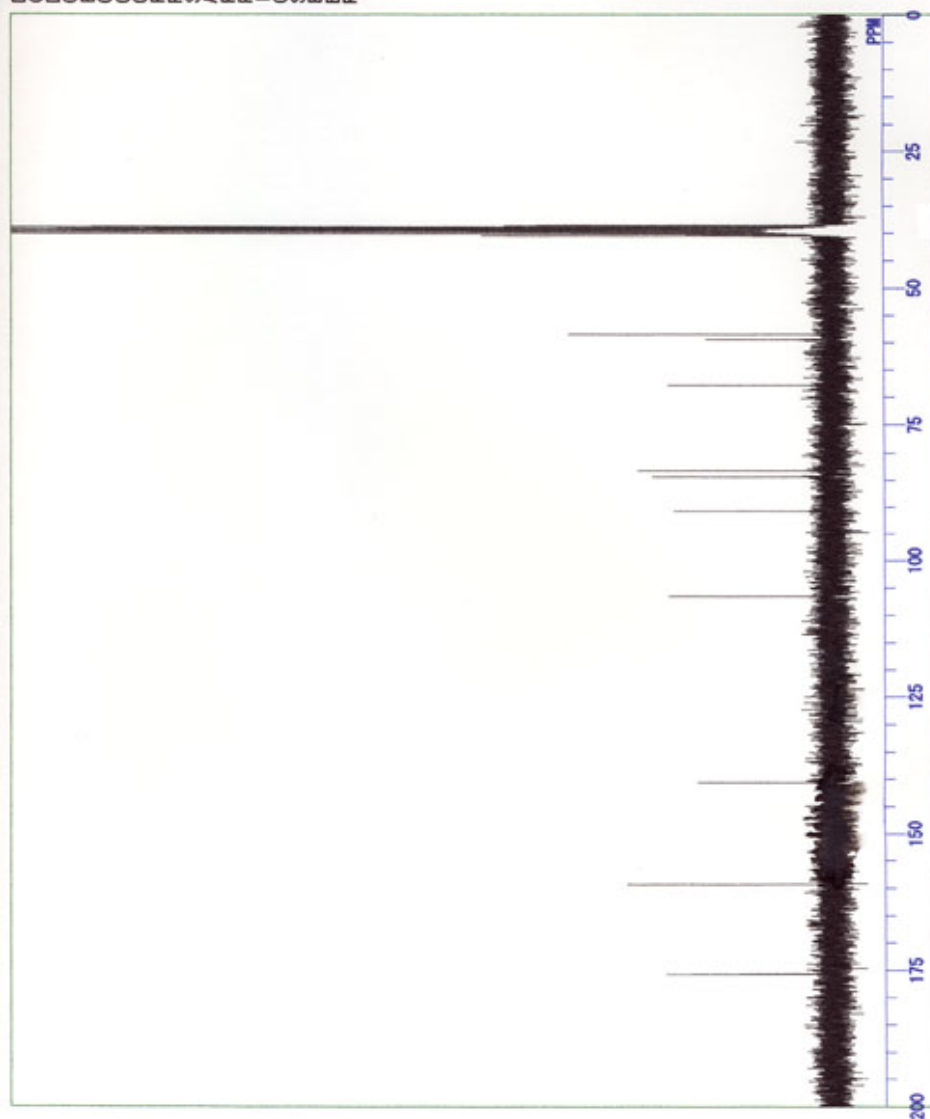

<sup>13</sup>C NMR spectrum

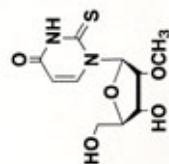

**3b**

C:\My Documents\Kokamoto\2\_6-dimethylPh-2'-  
 COMINT 2'-allyl-4-O-phenyl-TIPDS-U 1H  
 DATUM Wed Sep 26 10:03:11 2001

DEFILE  
 COMINT 2'-allyl-4-O-phenyl-TIPDS-U 1H  
 DATUM Wed Sep 26 10:03:11 2001  
 OBNUC 1H  
 EXMOD NON  
 OBFRQ 270.05 MHz  
 OBSET 112.00 KHz  
 OBFTN 5800.0 Hz  
 POINT 16384  
 FREQU 5402.4 Hz  
 SCANS 8  
 ACQTM 3.033 sec  
 PD 0.935 sec  
 PM1 5.1 us  
 1H  
 IRNUC 25.8 c  
 CTMP CDCL3  
 SLVNT 0.00 ppm  
 EXREF 0.20 Hz  
 BF 18  
 RGAIN

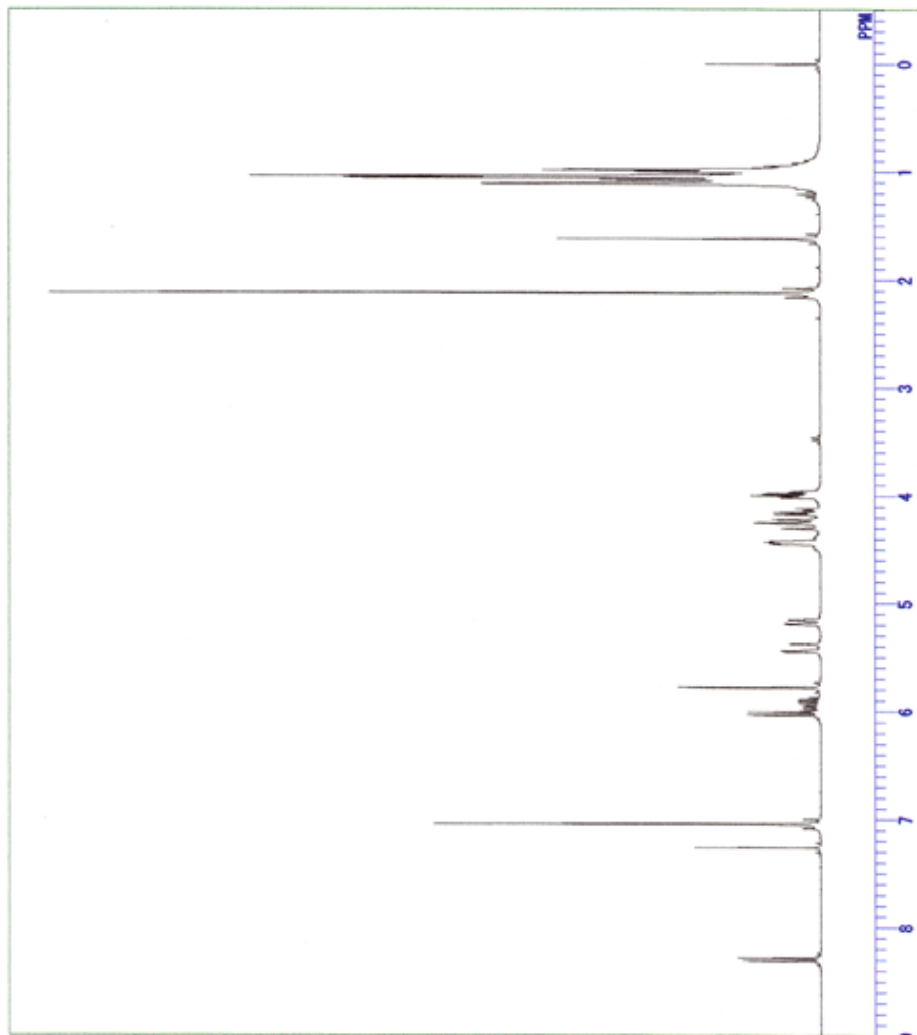

<sup>1</sup>H NMR spectrum

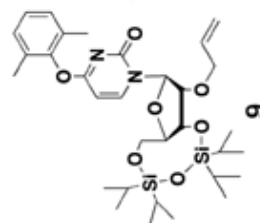

C:\My Documents\Kokamoto\2. 6-diaethy  
 DFILE COMNT  
 DATIM Wed Dec 19 14:36:51 2001  
 C13C  
 EXMOD BCM  
 OBFRQ 67.80 MHz  
 OBSET 135.00 KHz  
 OBFIN 5200.0 Hz  
 POINT 32768  
 FREQ 18315.0 Hz  
 SCANS 312  
 ACQTM 1.789 sec  
 PD 1.211 sec  
 PW 4.4 us  
 IRNUC 1H  
 CTMP 26.2 o  
 CDCL3  
 SLVNT 0.00 ppm  
 EXREF 0.20 Hz  
 BF 32  
 RGAIN

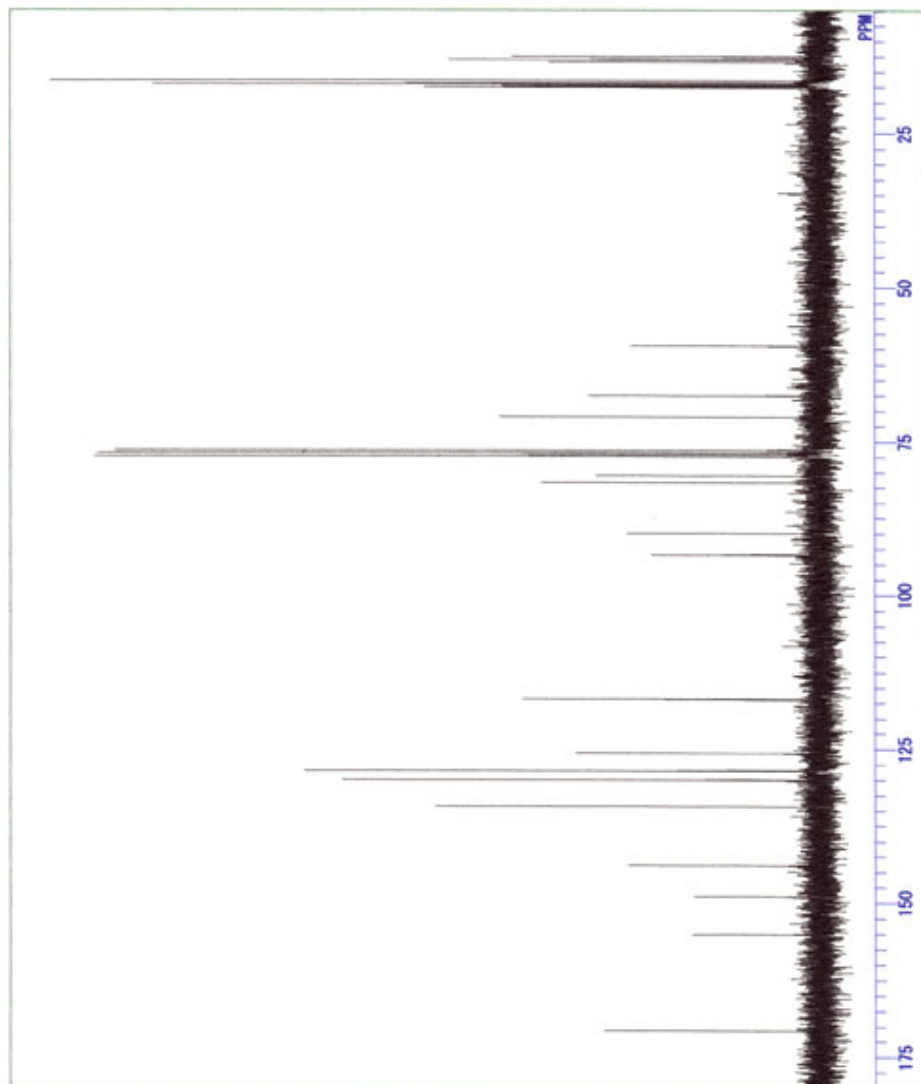

<sup>13</sup>C NMR spectrum

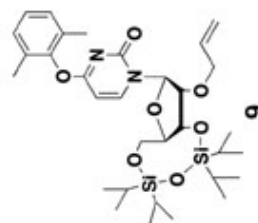



C:\VWINMR8\COMMON\DEFAULT.ALS

D:\FILE C:\VWINMR8\COMMON\DEFAULT.ALS  
 COMPT Wed Dec 19 10:49:52 2001  
 DATIM 1H  
 OSNUC 1H  
 EXMID NON  
 OSFRO 270.05 MHz  
 OSSET 112.00 KHz  
 OSFIN 5800.0 Hz  
 POINT 16384  
 FREQ 5402.4 Hz  
 SCANS 8  
 ACQTM 3.033 sec  
 PD 3.967 sec  
 PM1 5.1 us  
 1H 1H  
 1RNUC 26.7 o  
 CTMP COCL3  
 SLVT 0.00 ppm  
 EXREF 0.20 Hz  
 BF 15  
 RGAIN

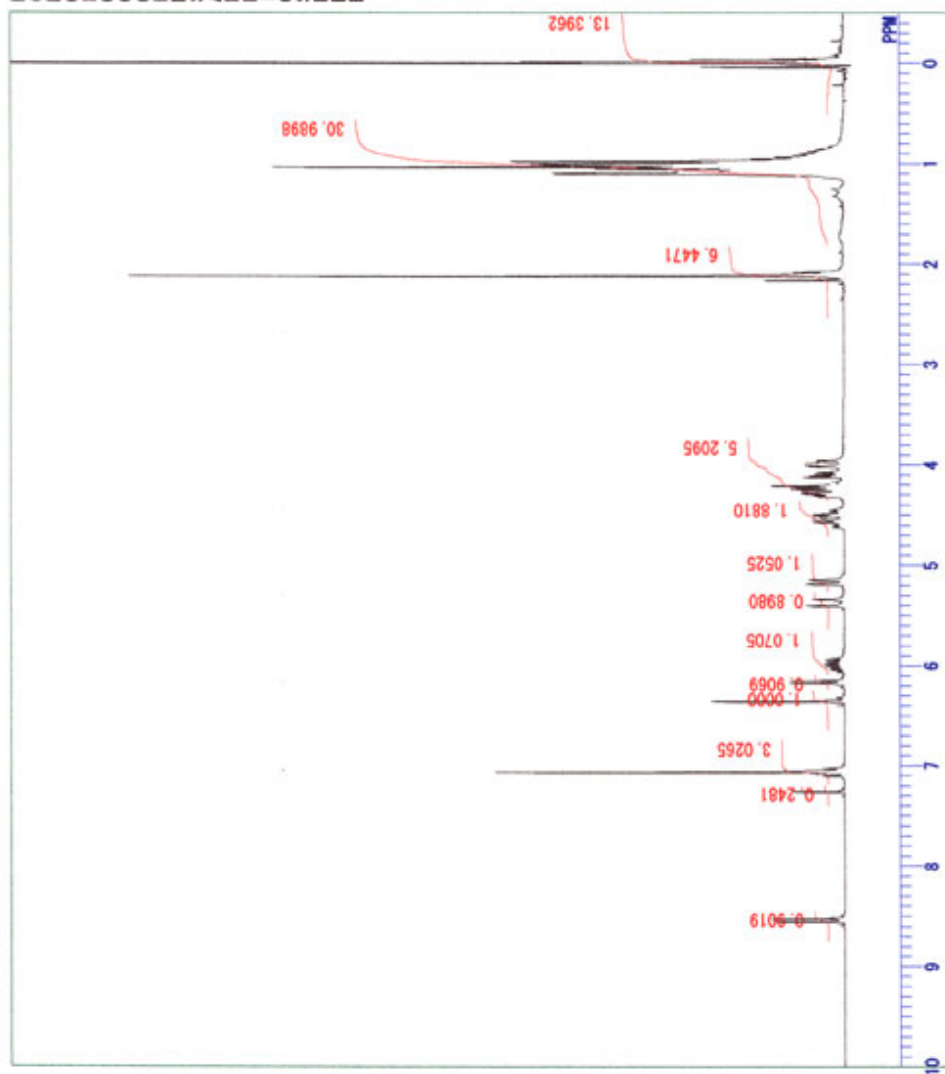

<sup>1</sup>H NMR spectrum

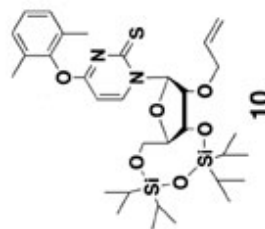

DFILE C:\Nly Documents\Yokamoto\2, 6-dimethy

COMPT Wed Dec 19 11:44:17 2001

DATUM 13C

EXMOD BCM

OBFRQ 67.80 MHz

OBSET 135.00 kHz

OBFIN 5200.0 Hz

POINT 32768

FREQD 18315.0 Hz

SCANS 1000

ACQTM 1.789 sec

PD 1.211 sec

PW 4.4 us

IRNUC 1H

CTEMP 25.2 c

SLVNT CDCl3

EXREF 0.00 ppm

BF 0.20 Hz

RGAIN 32

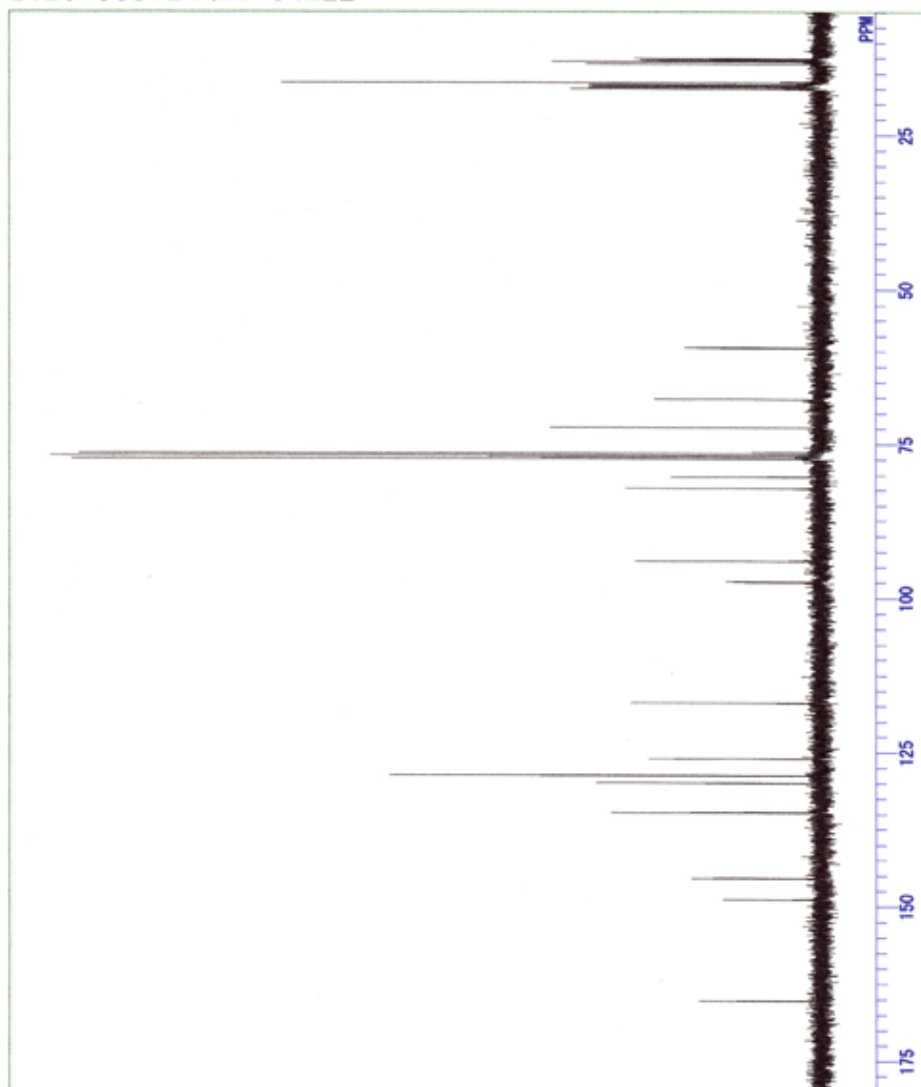

<sup>13</sup>C NMR spectrum

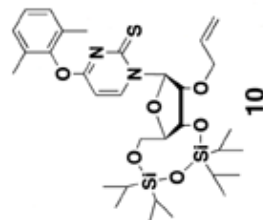

DFILE C:\Nky Documents\Kokamoto\2, 6-dimethyl Ph-2'

COMPT Tue Jan 08 14:25:42 2002  
 DATIM 1H  
 OBNUC 1H  
 EXMOD NON  
 OBFRQ 270.05 MHz  
 OBSET 112.00 KHz  
 OBFIN 5800.0 Hz  
 POINT 16384  
 FREQU 5402.4 Hz  
 SCANS 8  
 ACQTM 3.033 sec  
 PD 3.967 sec  
 PVI 5.1 us  
 TRNUC 1H 22.9 c  
 CTEMP CDCL3  
 SLVNT 0.00 ppm  
 EXREF 0.20 Hz  
 BF 18  
 RGAIN

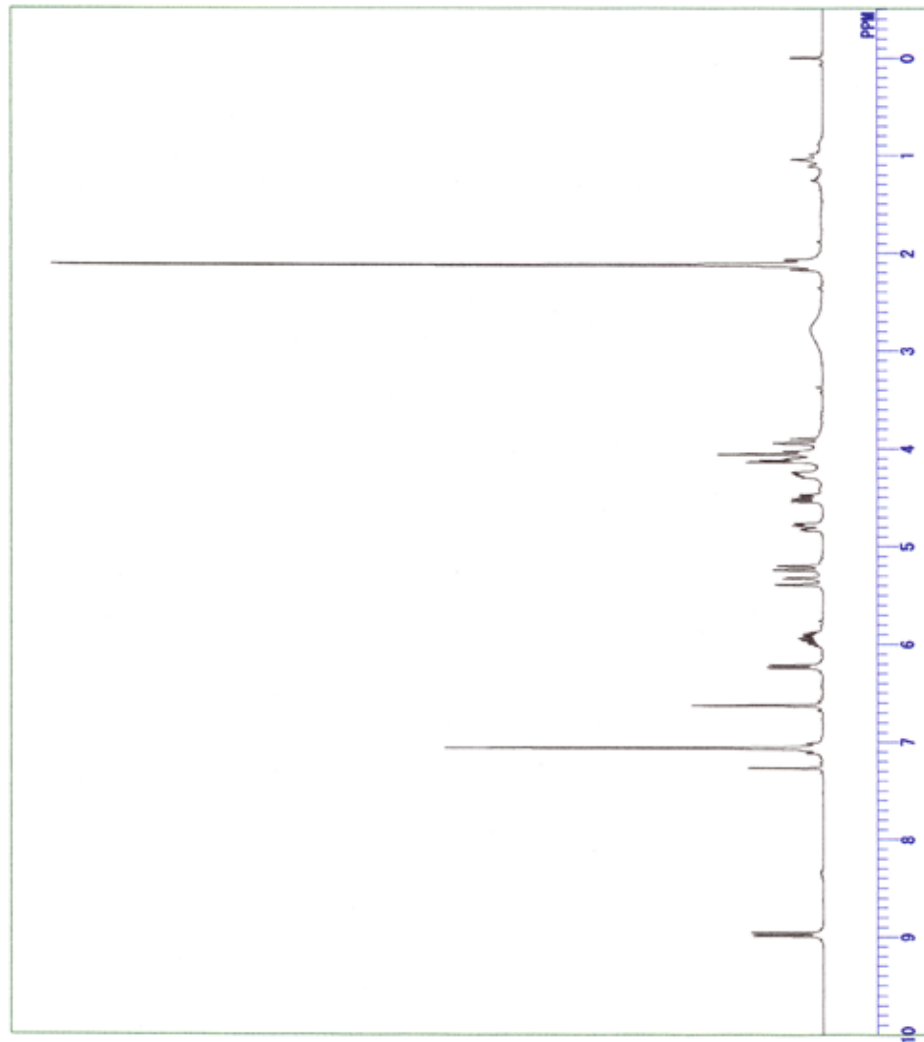

<sup>1</sup>H NMR spectrum

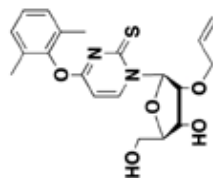

11

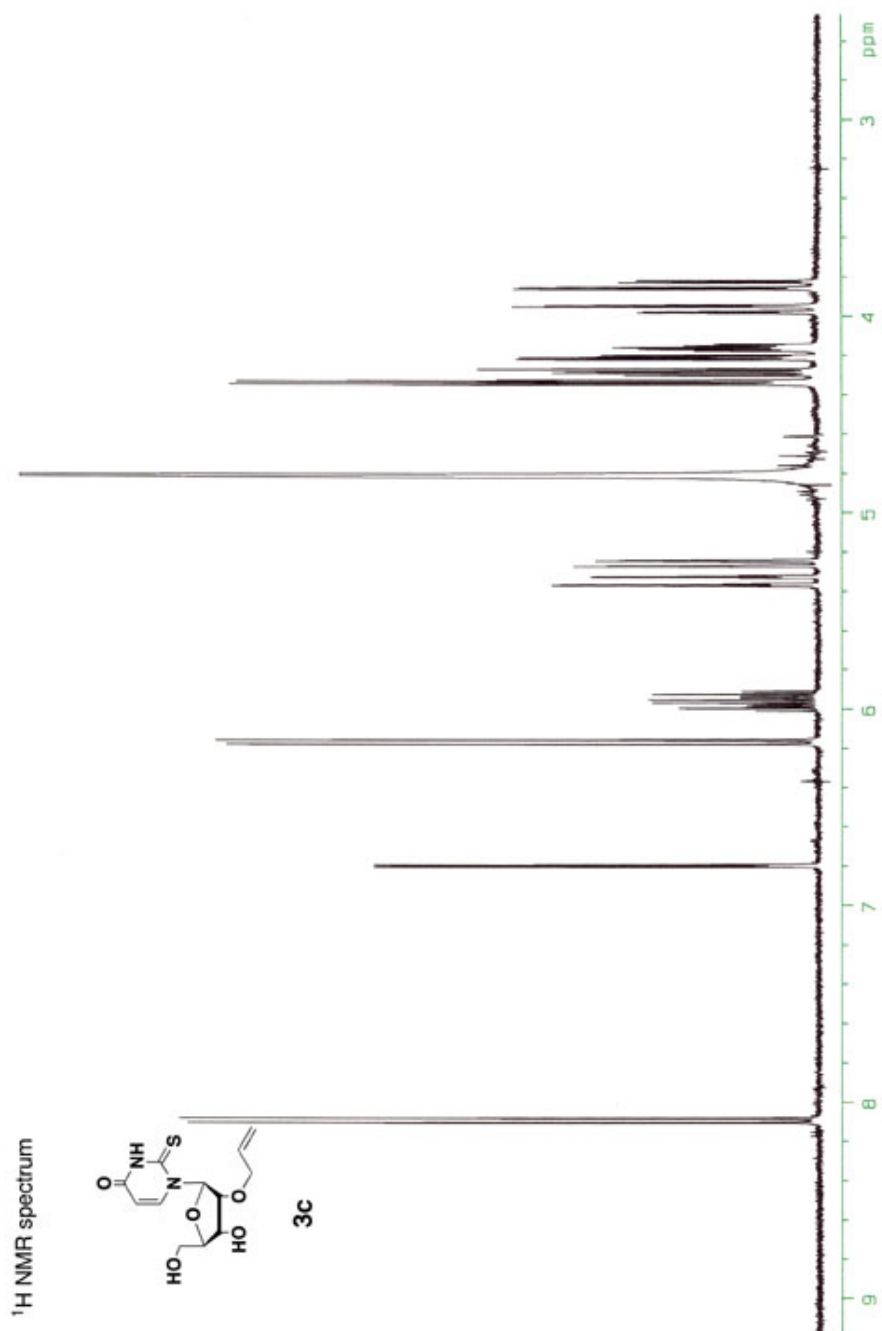

C:\My Documents\Kokamoto\2\_6-dimethy

DFILE

COMNT

DATIM Tue Jan 08 15:23:47 2002

OBNUC 13C

EXM30 BCM

OBFRQ 67.80 MHz

OBSET 135.00 KHz

OBFTN 5200.0 Hz

POINT 32768

FREQU 18315.0 Hz

SCANS 1000

ACQTM 1.789 sec

PD 1.211 sec

PW1 4.4 us

IRNUC 1H

CTEMP 23.0 c

SLVNT CDCL3

EXREF 77.00 ppm

BF 0.20 Hz

RGAIN 32

<sup>13</sup>C NMR spectrum

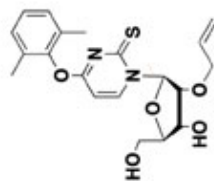

11

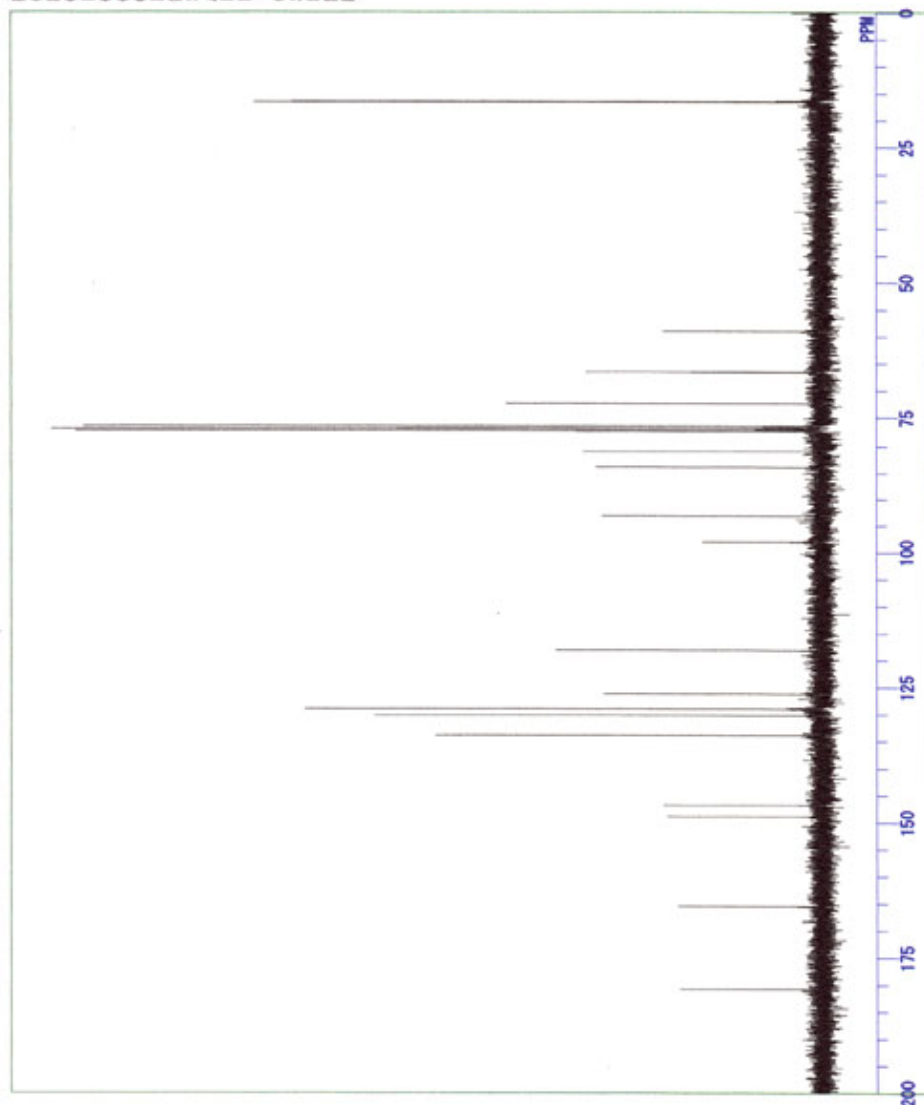



C:\Vky Documents\Yokamoto\2\_6-dimethylPh-2

DEFILE  
 COUNT 1H  
 DATUM 1H  
 EXMOD NON  
 OBFRQ 270.05 MHz  
 OBSET 112.00 KHz  
 OBFIN 5800.0 Hz  
 POINT 16384  
 FREQU 5402.4 Hz  
 SCANS 8  
 ACQTIM 3.032 sec  
 PD 0.935 sec  
 PUL 5.1 us  
 TRNUC 1H  
 CTEMP 24.8 c  
 SLVNT CDCL3  
 EXREF 0.00 ppm  
 BF 0.10 Hz  
 RGAIN 14

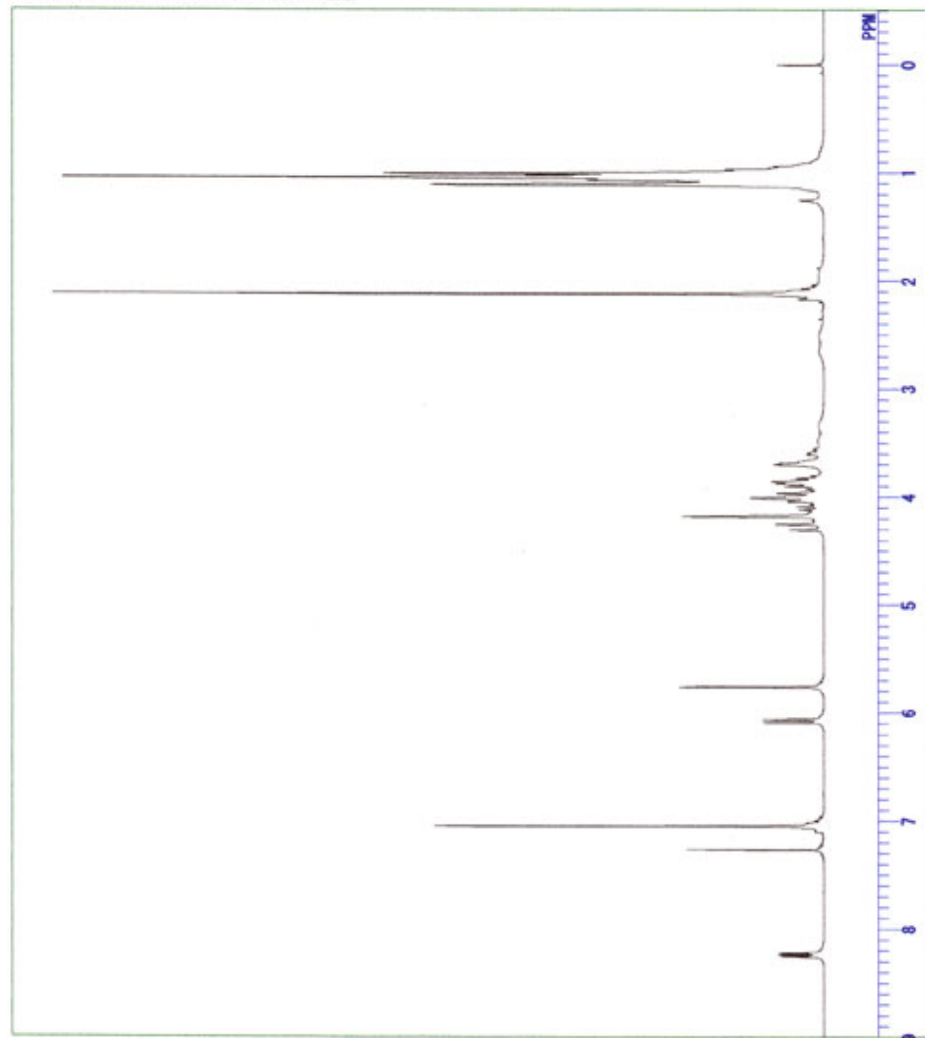

<sup>1</sup>H NMR spectrum

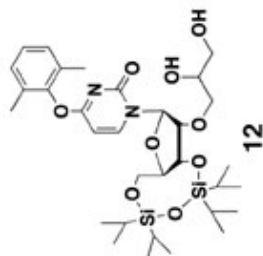





C:\Vily Documents\kokamoto\2\_6-dimethylPh-2'

DE FILE  
 C:\Vily Documents\kokamoto\2\_6-dimethylPh-2'  
 DATIM Wed Oct 10 10:45:28 2001  
 EXMUC 1H  
 EXMUC NON  
 OBFRO 270.05 MHz  
 OBFRO 112.00 KHz  
 OBFIN 5800.0 Hz  
 POINT 16384  
 FREQU 5402.4 Hz  
 SCANS 16  
 ACQTM 3.033 sec  
 PD 0.935 sec  
 PR 5.1 us  
 IRNUC 1H  
 CTMPC 25.2 c  
 SLVNT CDCL3  
 EXREF 0.00 ppm  
 BF 0.20 Hz  
 RGAIN 16

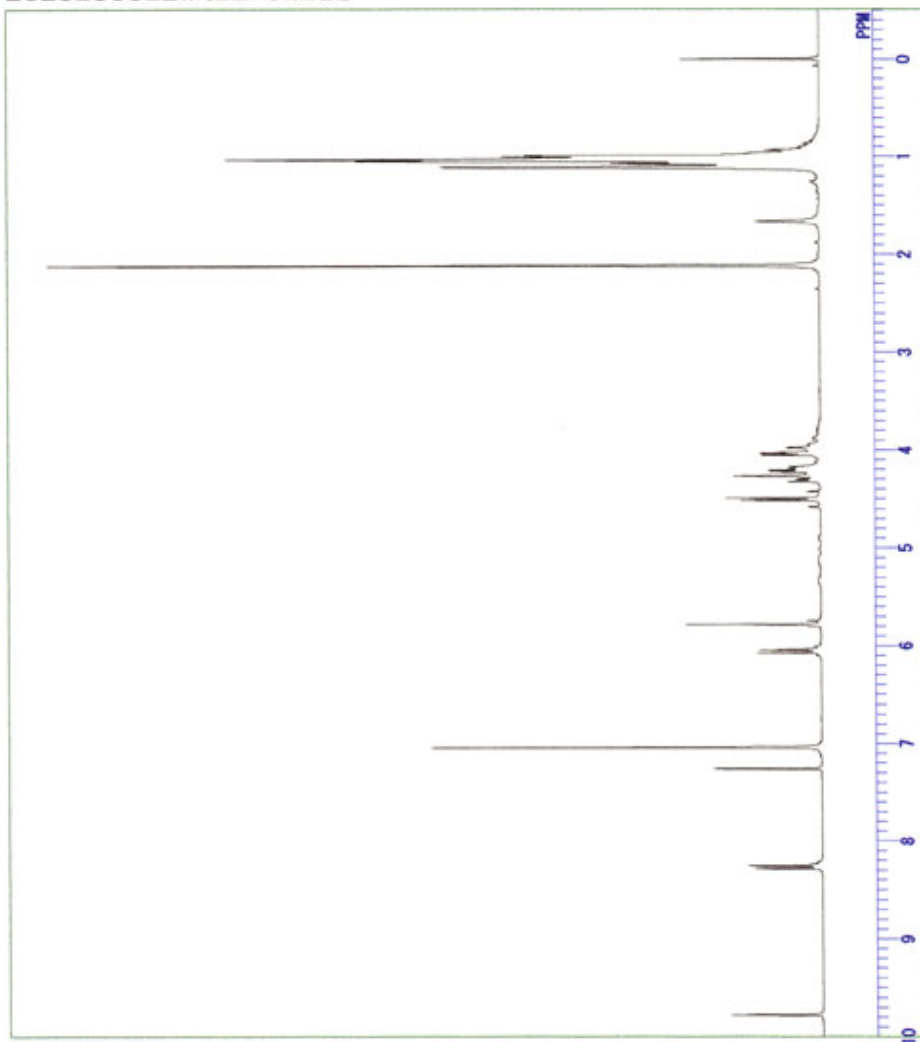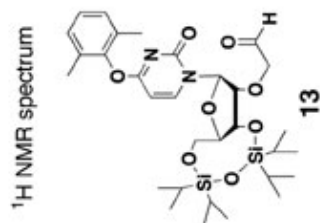

D:\My Documents\Yokamoto\2\_6-dimethy  
 COMET Wed Oct 10 11:37:12 2001  
 DATUM 13C  
 CENUC BCM  
 EXMOD BCM  
 OBPRO 67.80 MHz  
 OBSET 135.00 KHz  
 OBFIN 5200.0 Hz  
 POINT 32768  
 FREQU 18315.0 Hz  
 SCANS 500  
 ACQTM 1.789 sec  
 PD 1.211 sec  
 PW 4.4 us  
 1H 1H  
 IRNUC 25.4 c  
 CTEMP COOL3  
 SLVNT 77.00 ppm  
 EXREF 0.20 Hz  
 BF 32  
 RGAIN 32

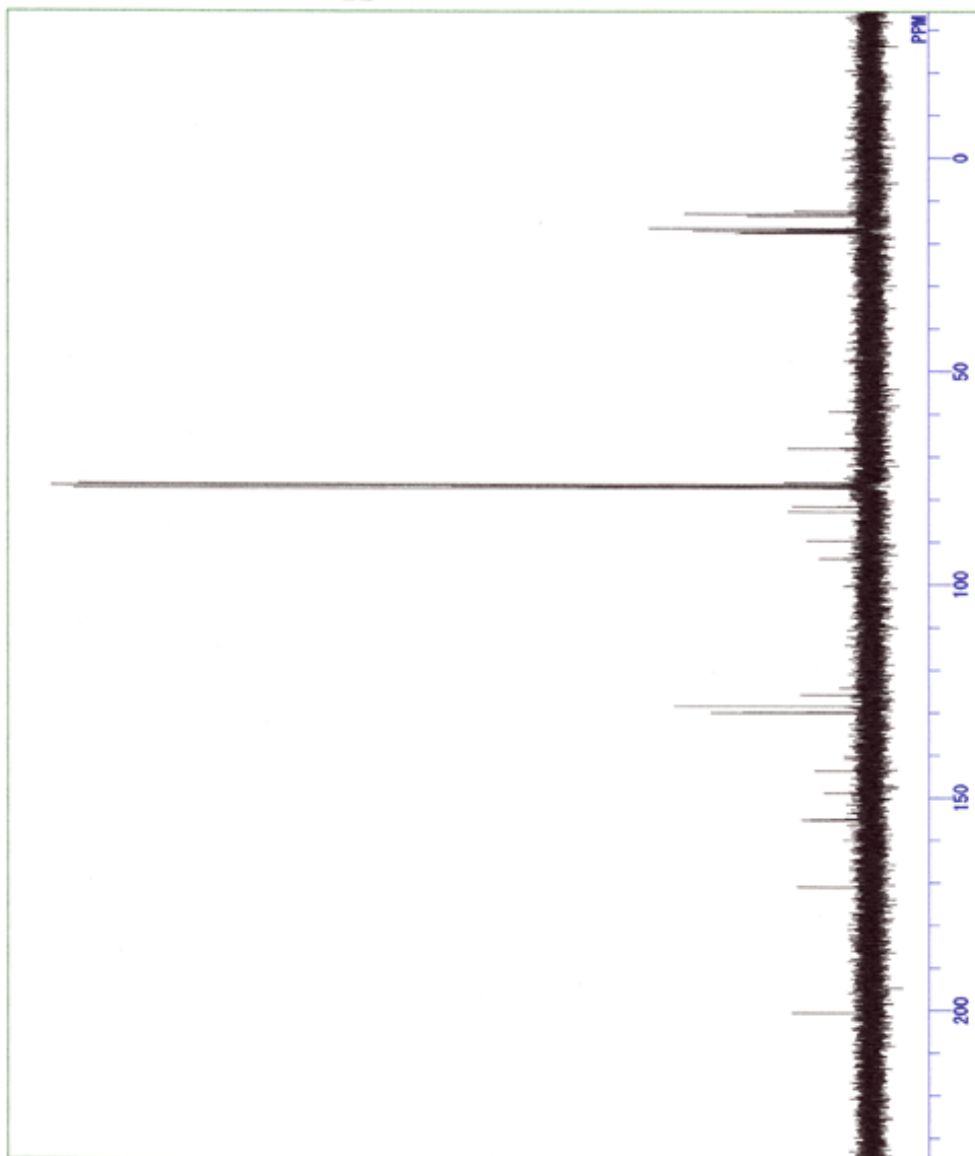

<sup>13</sup>C NMR spectrum

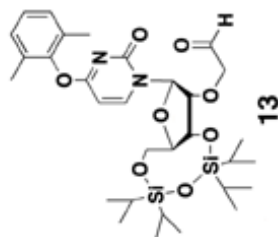

C:\Nky Documents\Kokamoto\2, 6-dimethylPh-2'

DE FILE  
 COUNT 1H  
 DATUM Thu Oct 11 14:59:12 2001  
 OBNUC 1H  
 EXMOD NON  
 OBFRQ 270.05 MHz  
 OBSET 112.00 KHz  
 OBFIN 5800.0 Hz  
 POINT 16384  
 FREQU 5402.4 Hz  
 SCANS 8  
 ACQTM 3.033 sec  
 PD 0.935 sec  
 PWT 5.1 us  
 1H 26.1 c  
 CTMP C0CL3  
 SLVT 0.00 ppm  
 EXREF 0.00 Hz  
 BF 14  
 RGAIN

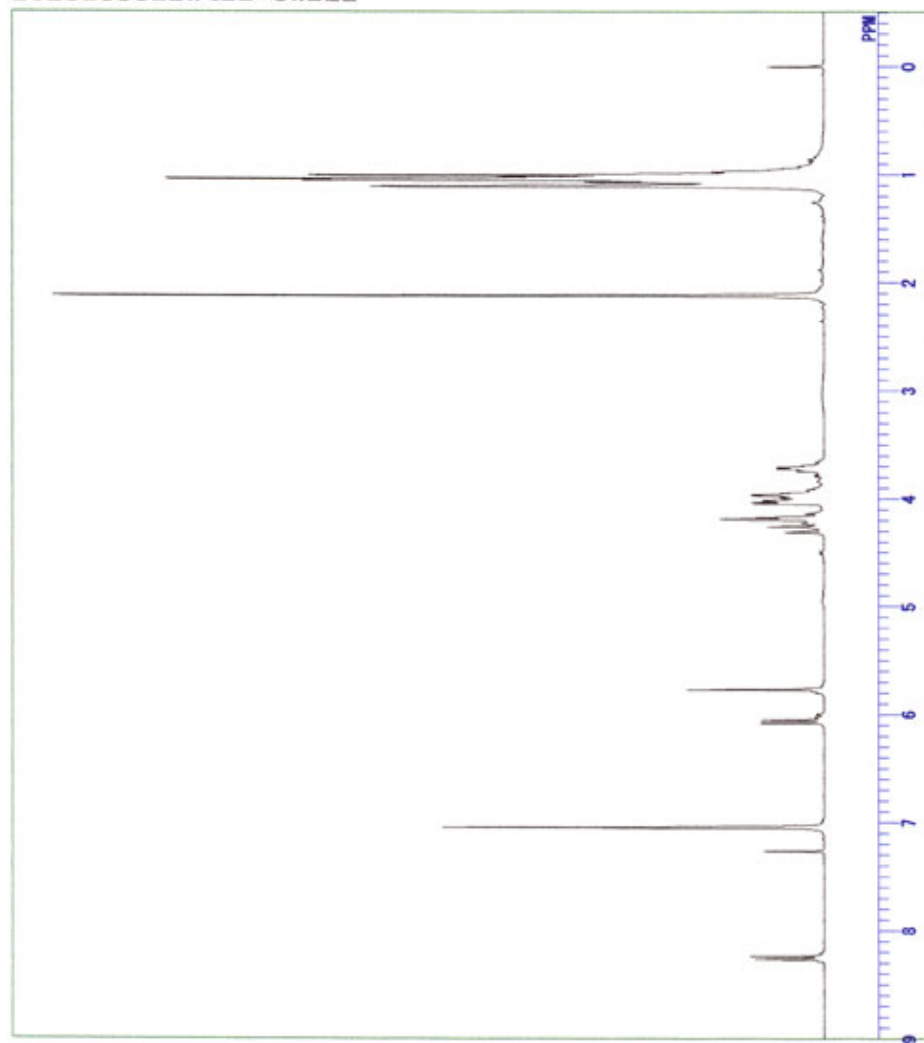

<sup>1</sup>H NMR spectrum

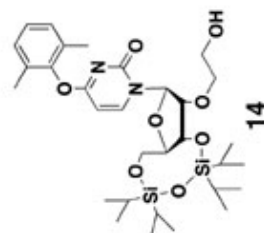

DFILE C:\My Documents\Yokamoto\2\_6-dimethy  
 COMPT Thu Oct 11 15:18:29 2001  
 DATIN 13C  
 CBNUC BOM  
 EXMDO BCM  
 OBFRO 67.80 MHz  
 OBSFRO 135.00 KHz  
 OBFIN 5200.0 Hz  
 POINT 32768  
 FREQU 18315.0 Hz  
 SCANS 300  
 ACQTM 1.789 sec  
 PD 1.211 sec  
 PM 4.4 us  
 LTRUC 1H 26.0 c  
 CTEMP CDCL3 77.00 ppm  
 SLYNT EXREF 0.00 Hz  
 BF 32  
 RGAIN

<sup>13</sup>C NMR spectrum

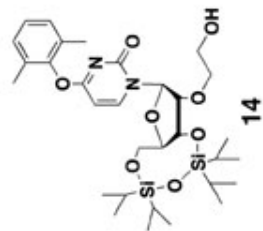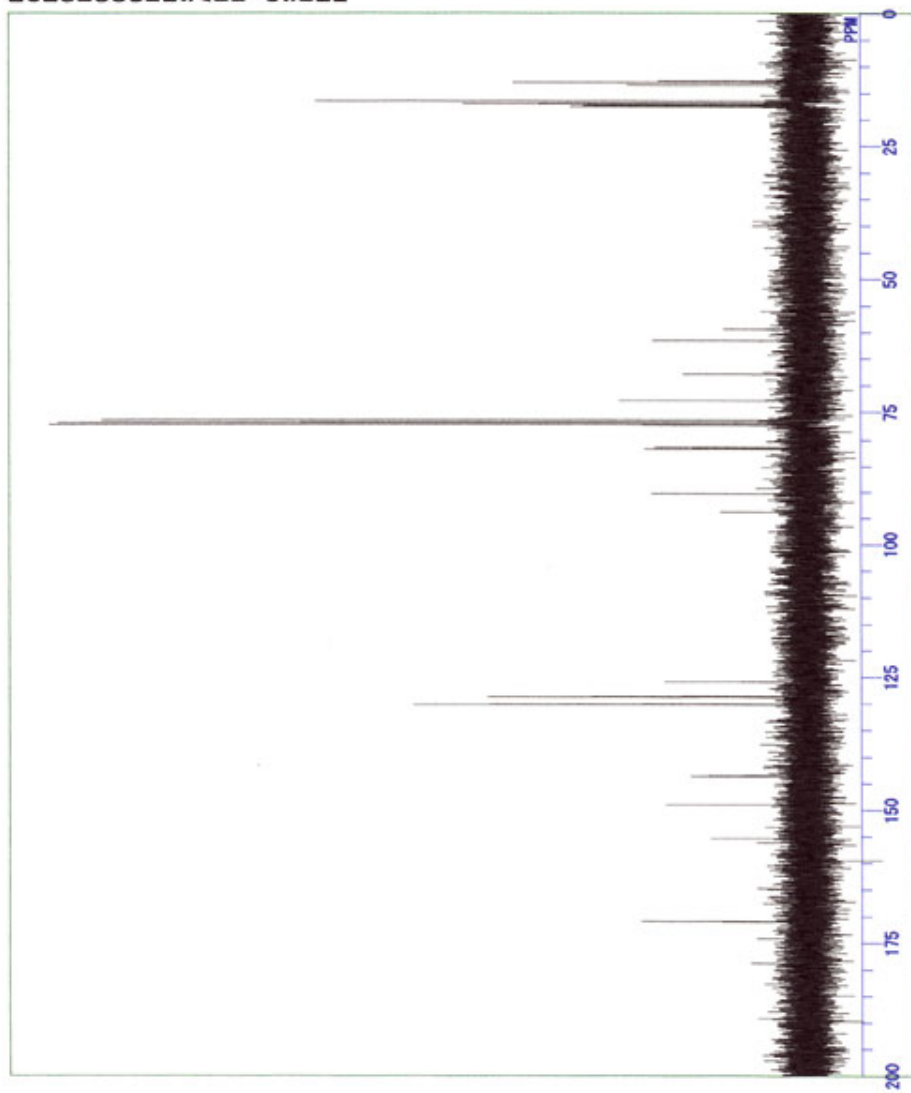

DE FILE C:\NW\ Documents\Nokamoto\2, 6-dimethyl\Ph-2'

COMET Tue Feb 05 11:25:42 2002

DATUM 1H

GENUC NON

EXPRO 270.05 MHz

OBFRQ 112.00 KHz

OBSET 5800.0 Hz

POINT 16384

FREQD 5402.4 Hz

SCANS 8

ACQTM 3.033 sec

PD 3.967 sec

PW1 5.1 us

IRNUC 1H

CTEMP 21.0 c

SLVNT CDCL3

EXREF 7.24 ppm

BF 0.20 Hz

RGAIN 13

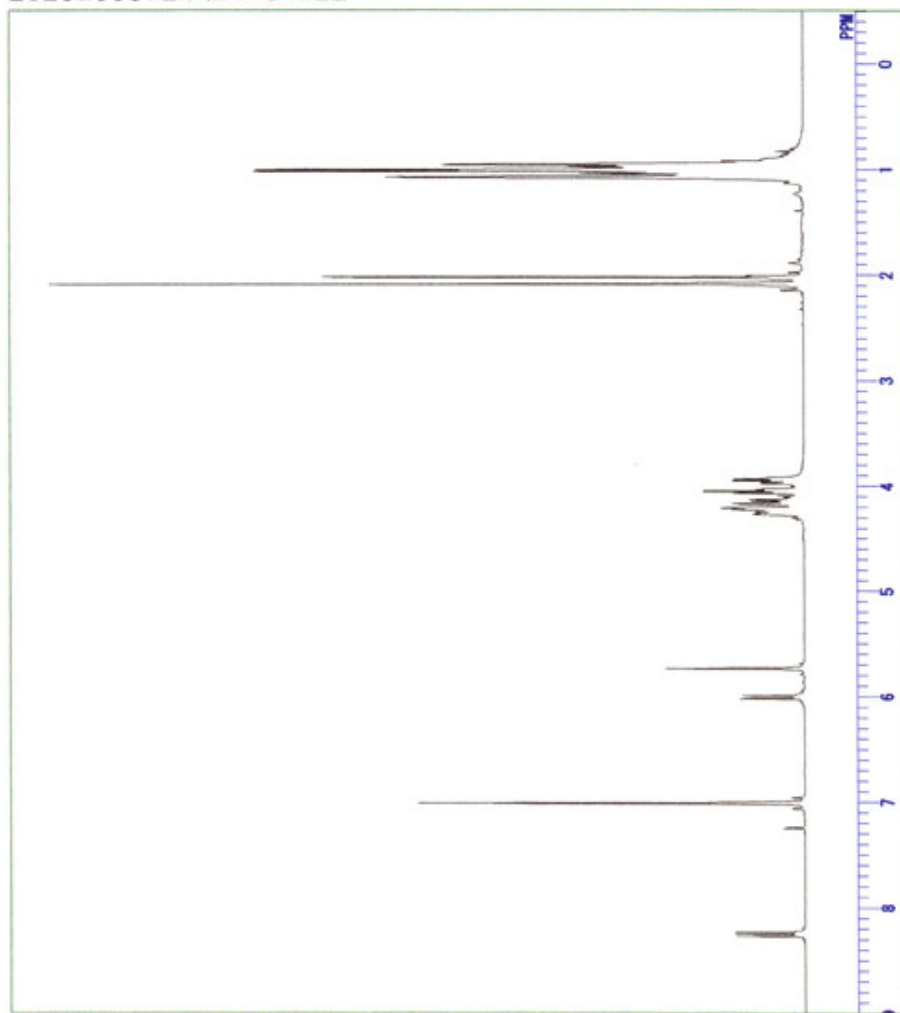

<sup>1</sup>H NMR spectrum

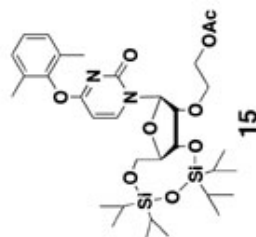





DFILE C:\Nhy Documents\Yokamoto\2, 6-dimethy

COMET  
DATIM Tue Feb 05 11:44:15 2002  
OBNUC 13C  
EXMOD BCM  
OBFRO 67.80 MHz  
OBFRO 135.00 KHz  
OBFIN 5200.0 Hz  
POINT 32768  
FREQU 18315.0 Hz  
SCANS 240  
ACQTM 1.789 sec  
PD 1.211 sec  
PMT 4.4 us  
IRNUC 1H  
CTEMP 21.6 c  
SLVNT CDCL3  
EXREF 77.00 ppm  
BF 0.20 Hz  
RGAIN 32

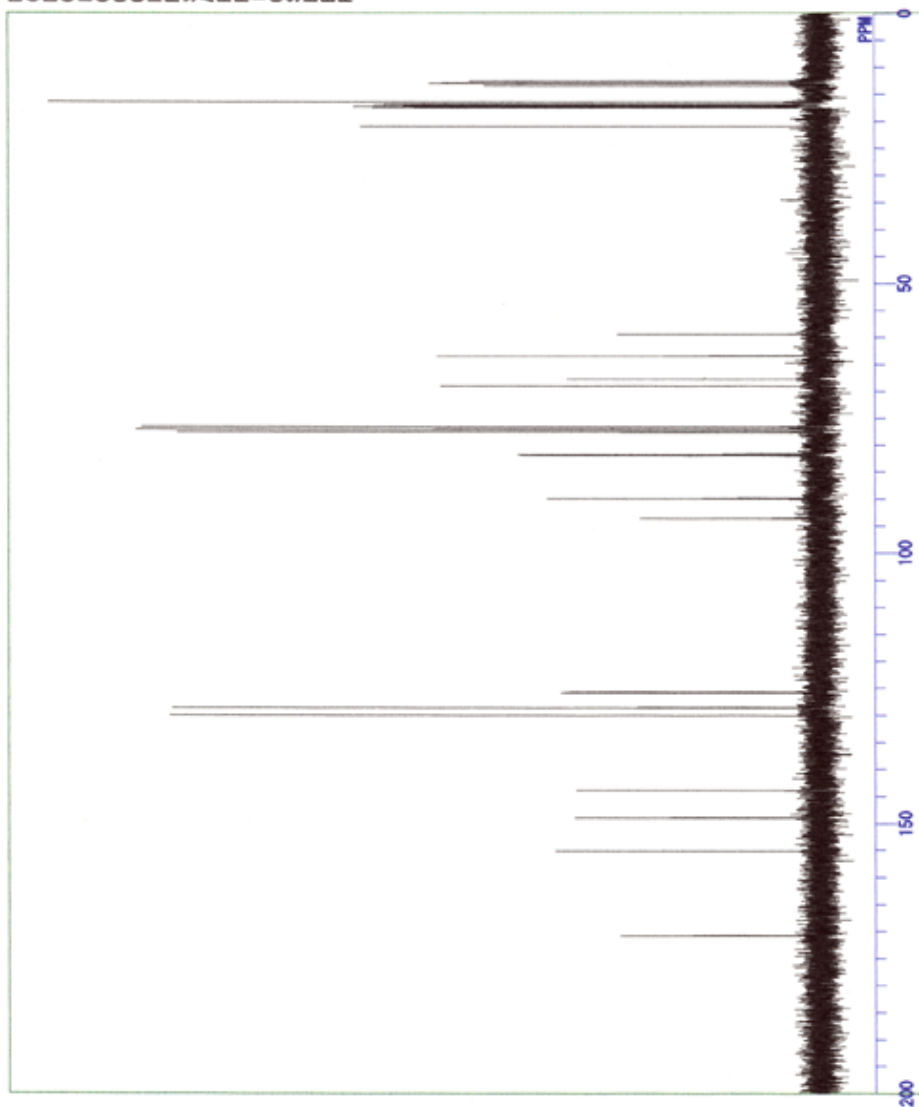

<sup>13</sup>C NMR spectrum

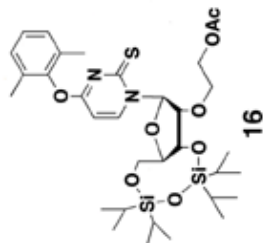

16



C:\My Documents\kokamoto\2' -CH2CH2OAc-TIPD

DEFILE  
 C:\My Documents\kokamoto\2' -CH2CH2OAc-TIPD  
 DATE: Fri Mar 15 16:38:16 2002  
 CHANNEL 1H  
 EXMOD NON  
 OBFRQ 270.05 MHz  
 OBSET 112.00 KHz  
 OBFIN 5800.0 Hz  
 POINT 16384  
 FREQU 5402.4 Hz  
 SCANS 8  
 ACQTM 3.033 sec  
 PD 3.967 sec  
 PRT 5.1 us  
 TRNUC 1H  
 CTMP 23.5 c  
 SLVNT CDCL3  
 EXREF 0.00 ppm  
 BF 0.10 Hz  
 RGAIN 1.4

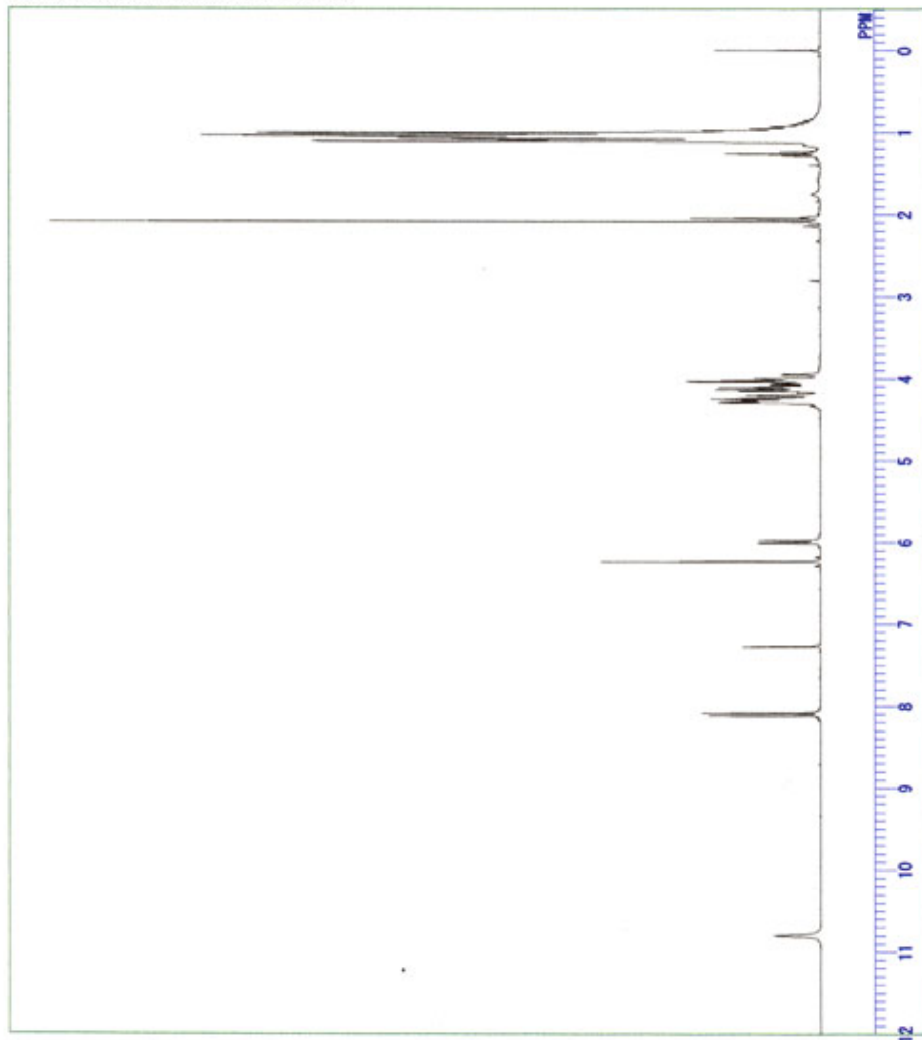

<sup>1</sup>H NMR spectrum

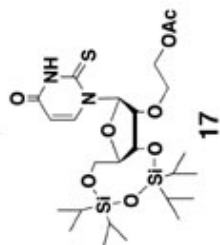

```
DFILE  COMINT  DATIM  OBNUC  EXMOD  OBFRO  OBFSE  OBFIN  POINT  FREQU  SCANS  ACOTM  PD  PWI  IRNUC  CTEMP  SLVNT  EXREF  BF  RGA IN
```

DATE TIME PERIOD

GENUG  
EXMOD

DBFRQ  
DBSET

0851  
0852  
0853

POINT  
FREQUSCAMS  
ACOTM

PD

PWT  
IRNUJCCTEMP  
SI VNT

EXREF  
SLVING

RGAIN

<sup>13</sup>C NMR spectrum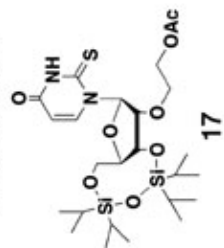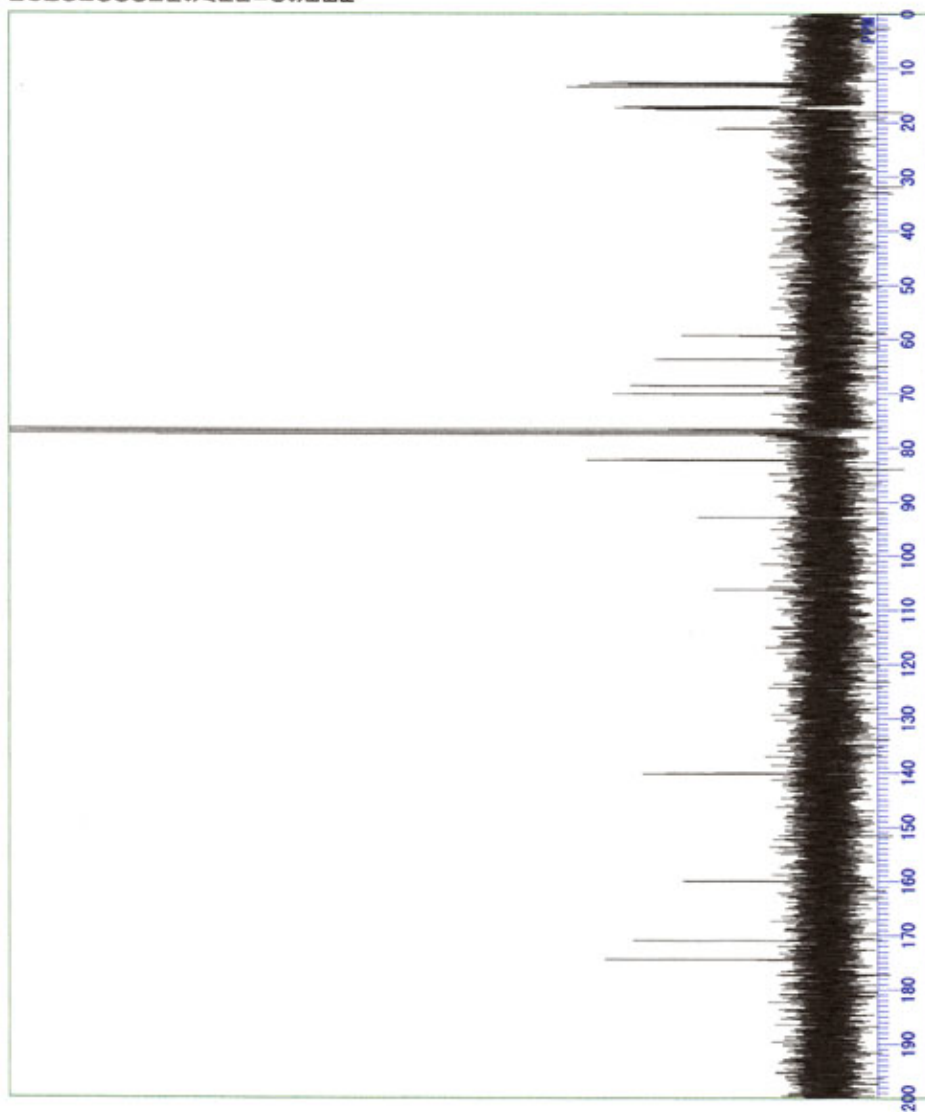

DE FILE C:\Nky Documents\Yokamoto\2' -CH2CH2OAc s2U

DATE Sat Mar 16 22:49:35 2002

NAME 1H

DEMOD NOH

EXMOD 270.05 MHz

OFFREQ 112.00 KHz

OFFSET 5800.0 Hz

POINT 16384

FREQ 5402.4 Hz

SCANS 8

ACQTM 3.033 sec

PD 3.967 sec

PW 5.1 us

PR 1H

IRNUC 24.3 c

CTEMP CDCL3

SLVNT 0.00 ppm

EXREF 0.20 Hz

BF 24

RGAIN

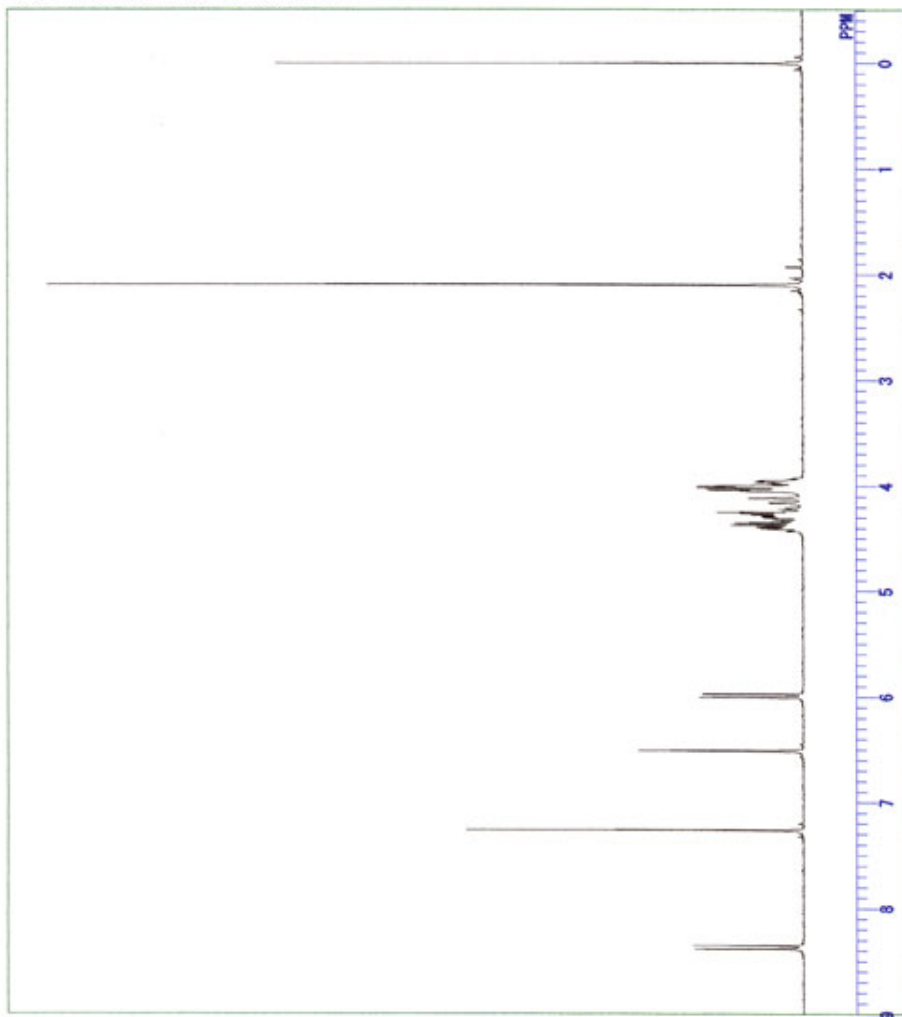

<sup>1</sup>H NMR spectrum

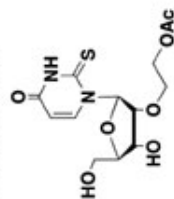

18

DFILE C:\My Documents\Yokamoto\Y2-CH2CH2O

COMINT  
 DATIM Fri May 16 11:36:36 2003  
 CNUC 13C  
 EXM00 BOM  
 OFRO 67.80 MHz  
 OFSET 135.00 KHz  
 OFIN 5200.0 Hz  
 POINT 32768  
 FREQU 18315.0 Hz  
 SCANS 1277  
 ACQTM 1.789 sec  
 PD 1.211 sec  
 PW 4.4 us  
 PWT 1H  
 IRNUC 22.8 c  
 CTMP DMSO  
 SLVNT 77.00 ppm  
 EXREF 0.12 Hz  
 BF 27  
 RGAIN

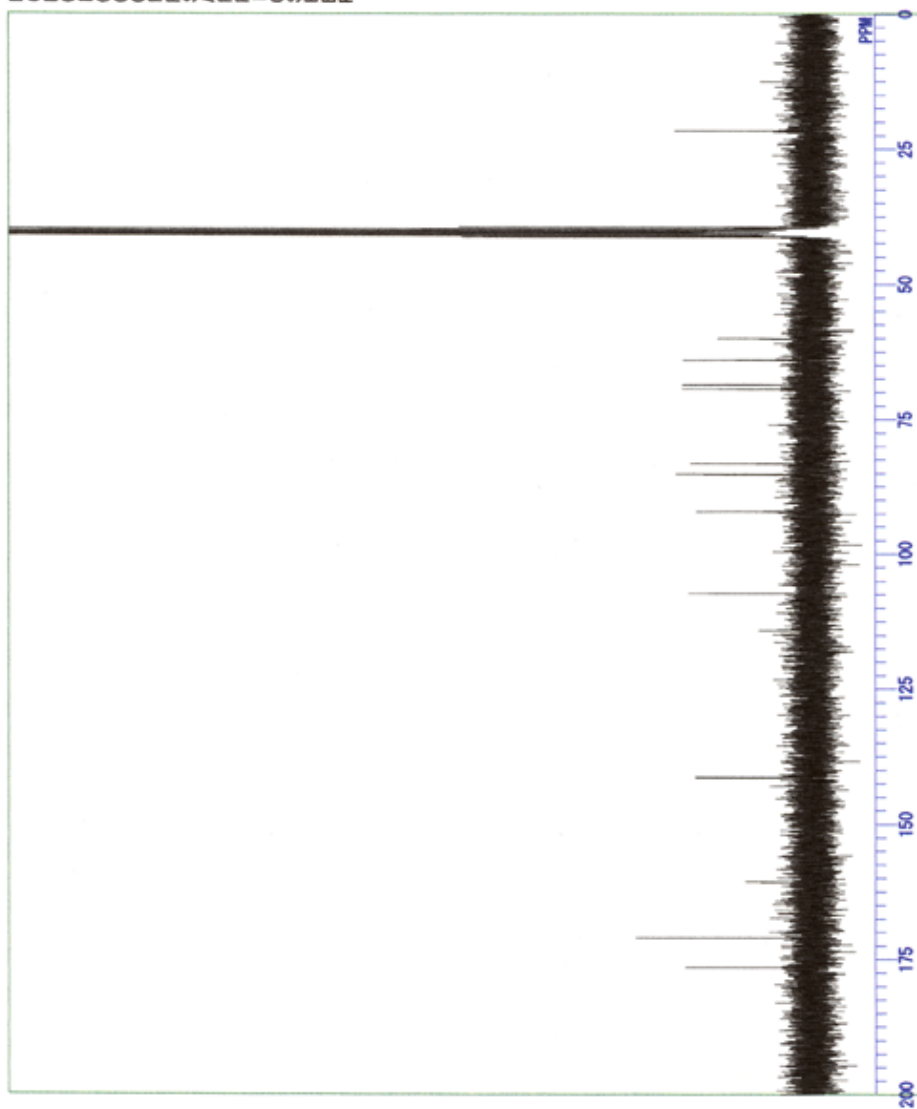

<sup>13</sup>C NMR spectrum

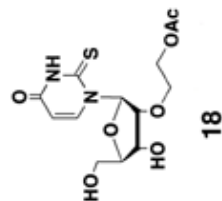

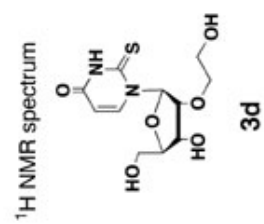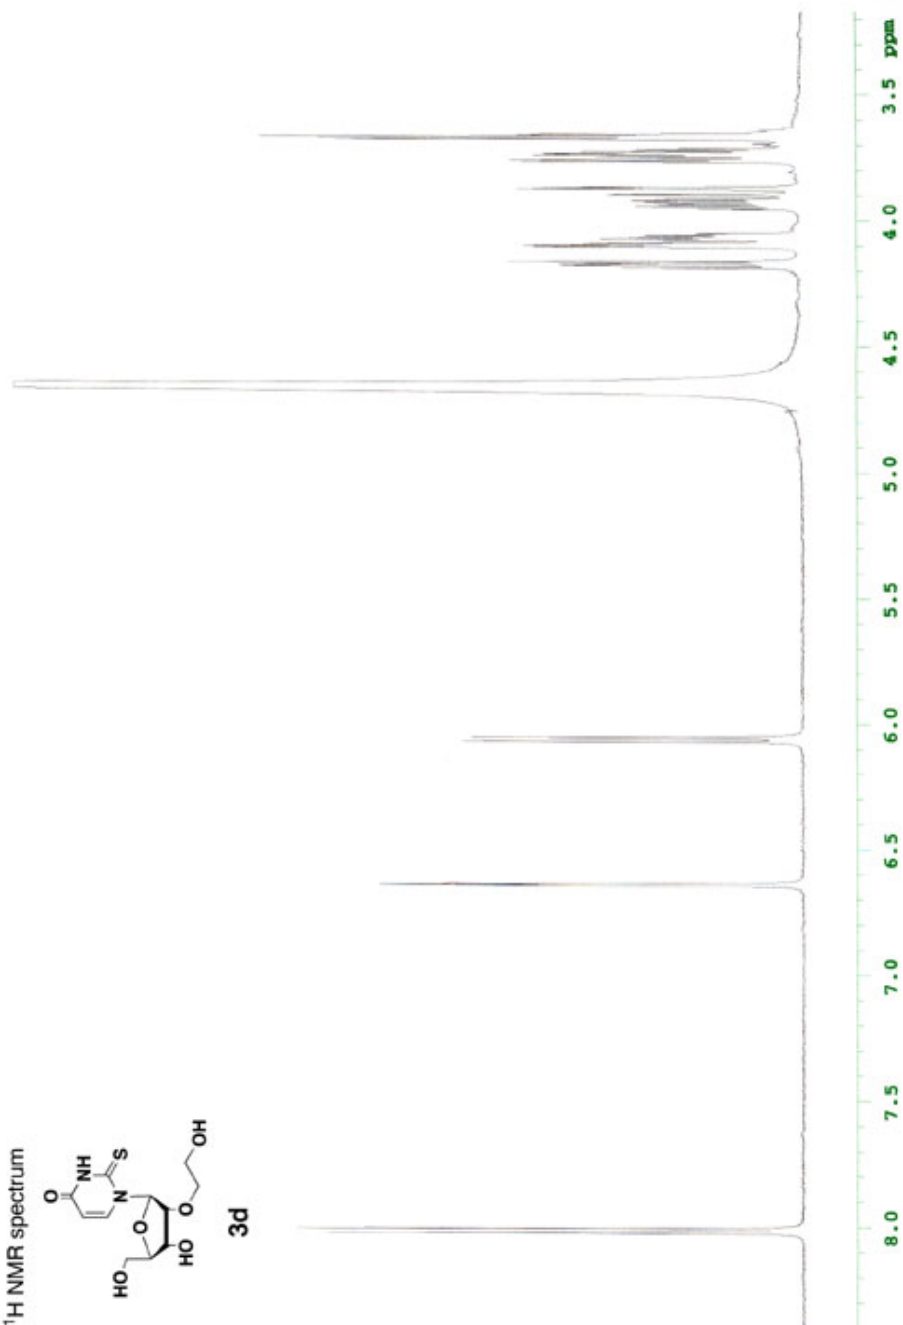

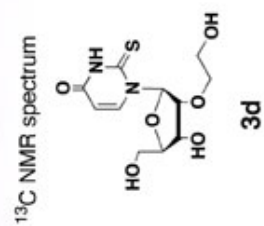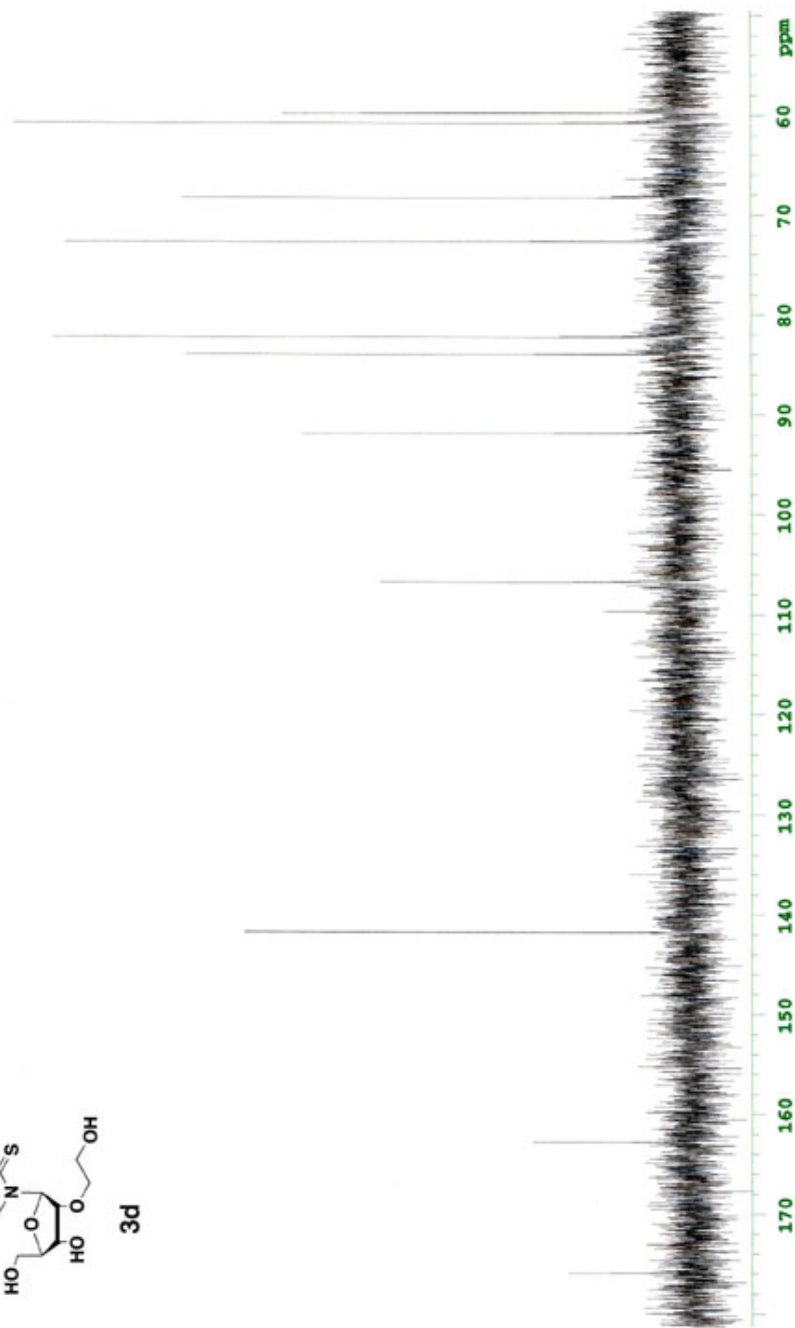



DFILE C:\My Documents\Kokamoto\Vanhydro met  
 CONNT Mon Feb 17 17:57:19 2003  
 DATIM 13C  
 GENUC 13C  
 EXMOD BCM  
 OFREQ 67.80 MHz  
 OBSET 135.00 KHz  
 OFEIN 5200.0 Hz  
 POINT 32768  
 FREQ 18315.0 Hz  
 SCANS 153  
 ACQTM 1.789 sec  
 PD 1.211 sec  
 PW 4.4 us  
 IRNUC 1H  
 CTMP 21.5 c  
 SLVNT CDCL3  
 EXREF 0.00 ppm  
 BF 0.12 Hz  
 RGAIN 27

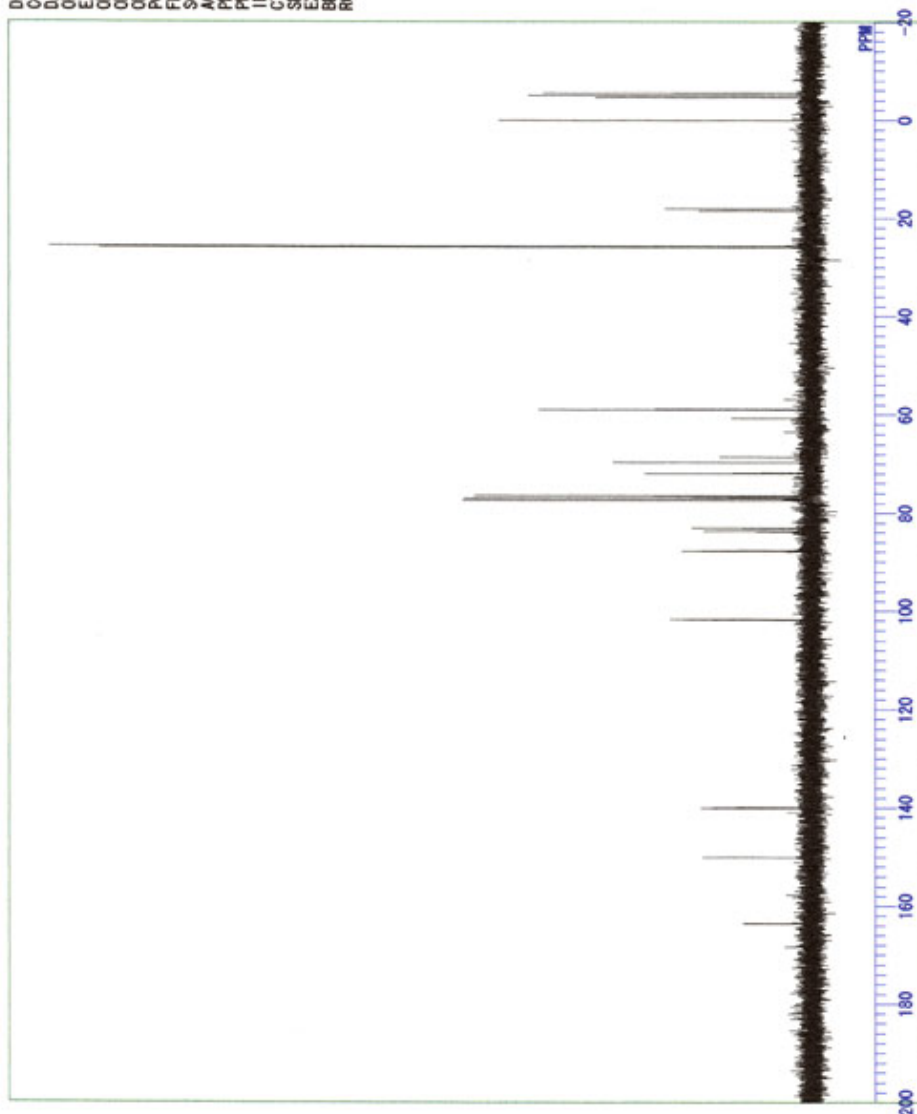

<sup>13</sup>C NMR spectrum

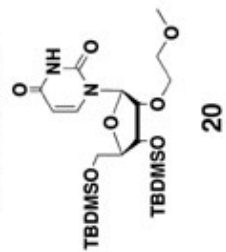



C:\My Documents\kokamoto\hydro method\4-4-

DE FILE  
 COUNT  
 DATIM  
 OBNUC  
 EXMOD  
 OBFRQ  
 OBSET  
 OBFIN  
 POINT  
 FREQU  
 SCANS  
 ACQTM  
 PD  
 PFI  
 TRNUC  
 CTEMP  
 SLVNT  
 EXREF  
 BF  
 RGAIN

Mon Feb 04 14:12:01 2002

1H  
 270.05 MHz  
 112.00 KHz  
 5800.0 Hz  
 16384  
 5402.4 Hz  
 8  
 3.033 sec  
 3.967 sec  
 5.1 us  
 1H  
 21.6 c  
 CDCL3  
 7.24 ppm  
 0.20 Hz  
 14

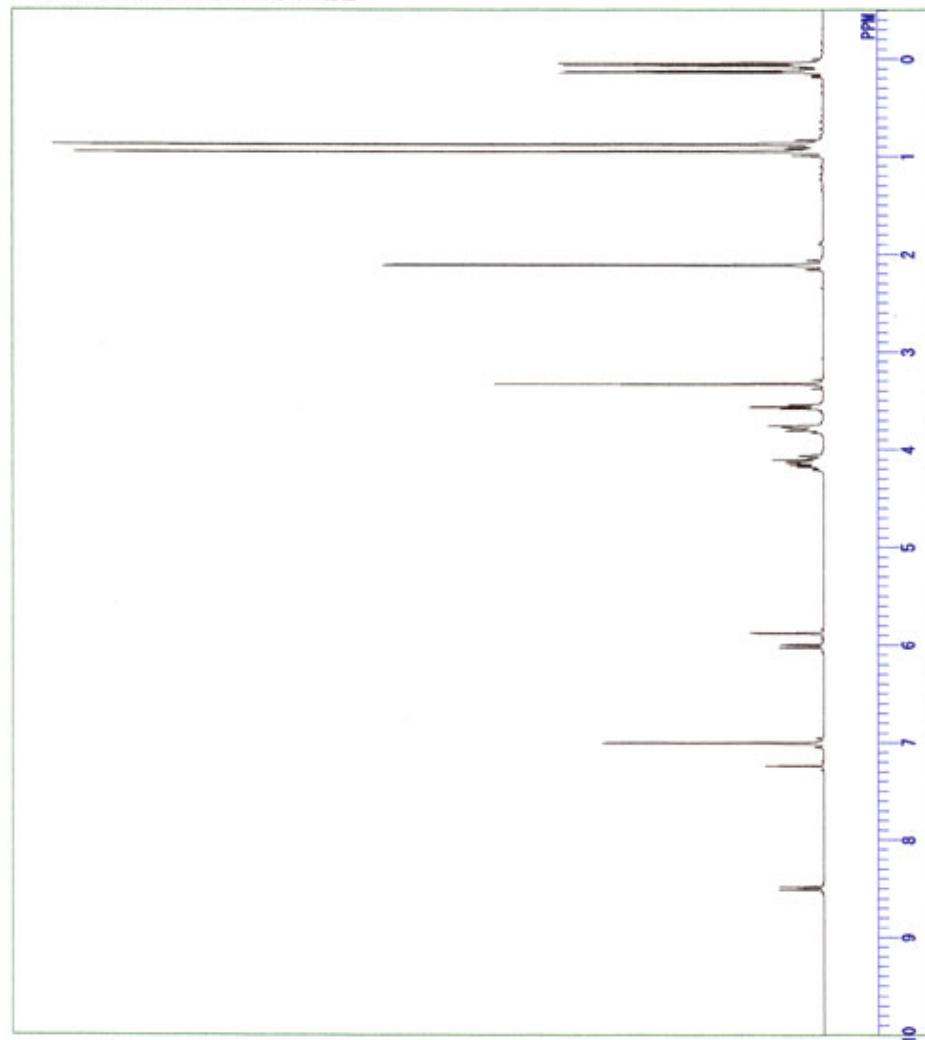

<sup>1</sup>H NMR spectrum

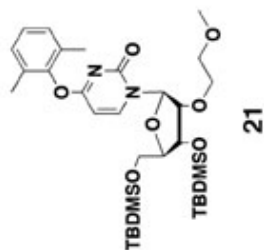

DFILE C:\My Documents\Kokamoto\anhydro met  
 COMMT Mon Feb 04 14:43:02 2002  
 DATIM 13C  
 GBNUC 13C  
 EXMOD BCM  
 OBFRQ 67.80 MHz  
 OBSET 135.00 KHz  
 OBFIN 5300.0 Hz  
 POINT 32768  
 FREQU 18315.0 Hz  
 SCANS 500  
 ACQTM 1.789 sec  
 PD 1.211 sec  
 PW 4.4 us  
 1H  
 IRNUC 21.4 c  
 CTMP CDCL3  
 SLVNT 77.00 ppm  
 EXREF 0.20 Hz  
 BF 32  
 RGAIN

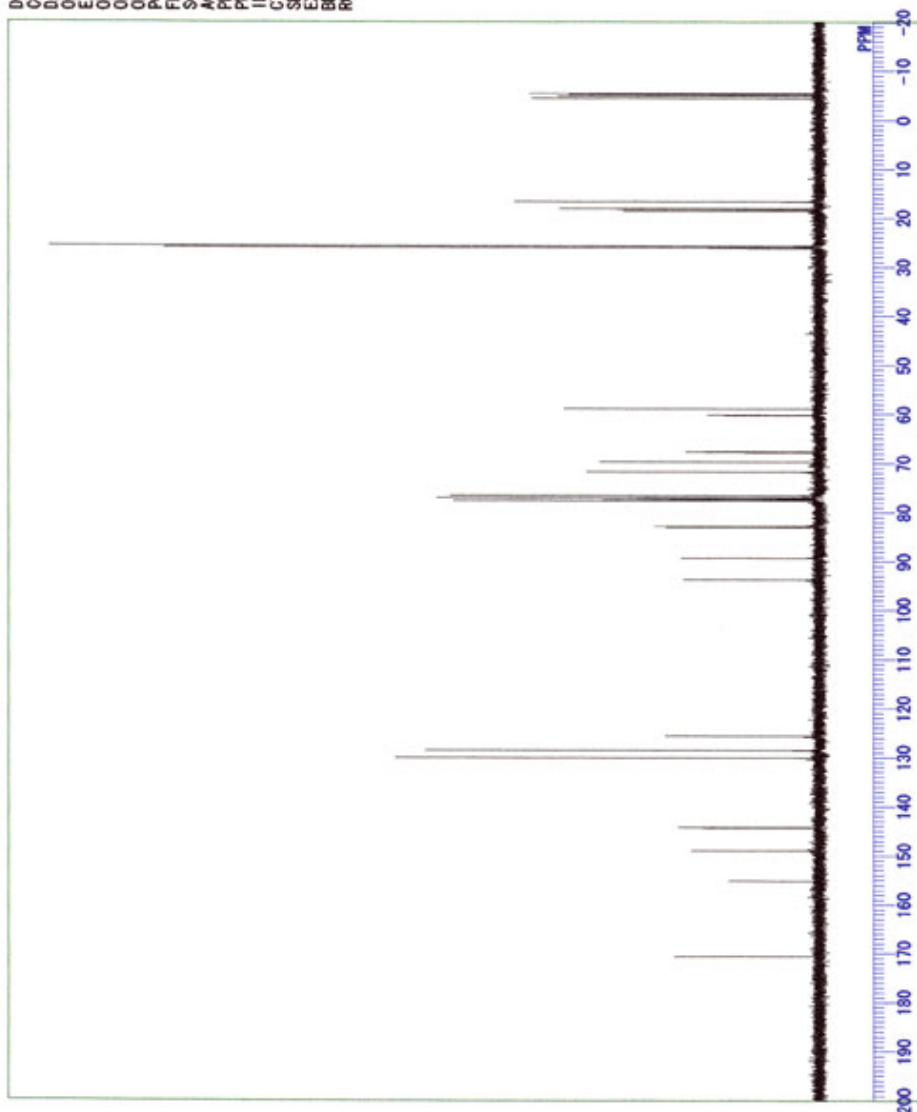

<sup>13</sup>C NMR spectrum

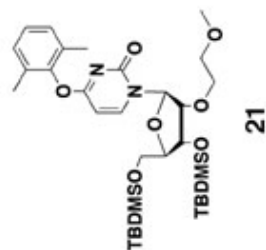

21

DFILE C:\My Documents\Yokamoto\5hydro method\4-1

CONV1  
DAT11 Mon Mar 11 00:53:04 2002  
GENUC 1H  
EXMOD NON  
OBFRQ 270.05 MHz  
OBSET 112.00 KHz  
OBFIN 5800.0 Hz  
POINT 16384  
FREQ 5402.4 Hz  
SCANS 8  
ACQTIM 3.033 sec  
PD 3.967 sec  
PULP 5.1 us  
PR1 1H  
IRNUC 1H  
CTEMP 24.6 c  
SLVNT CDCL3  
EXREF 0.00 ppm  
BF 0.20 Hz  
RGAIN 16

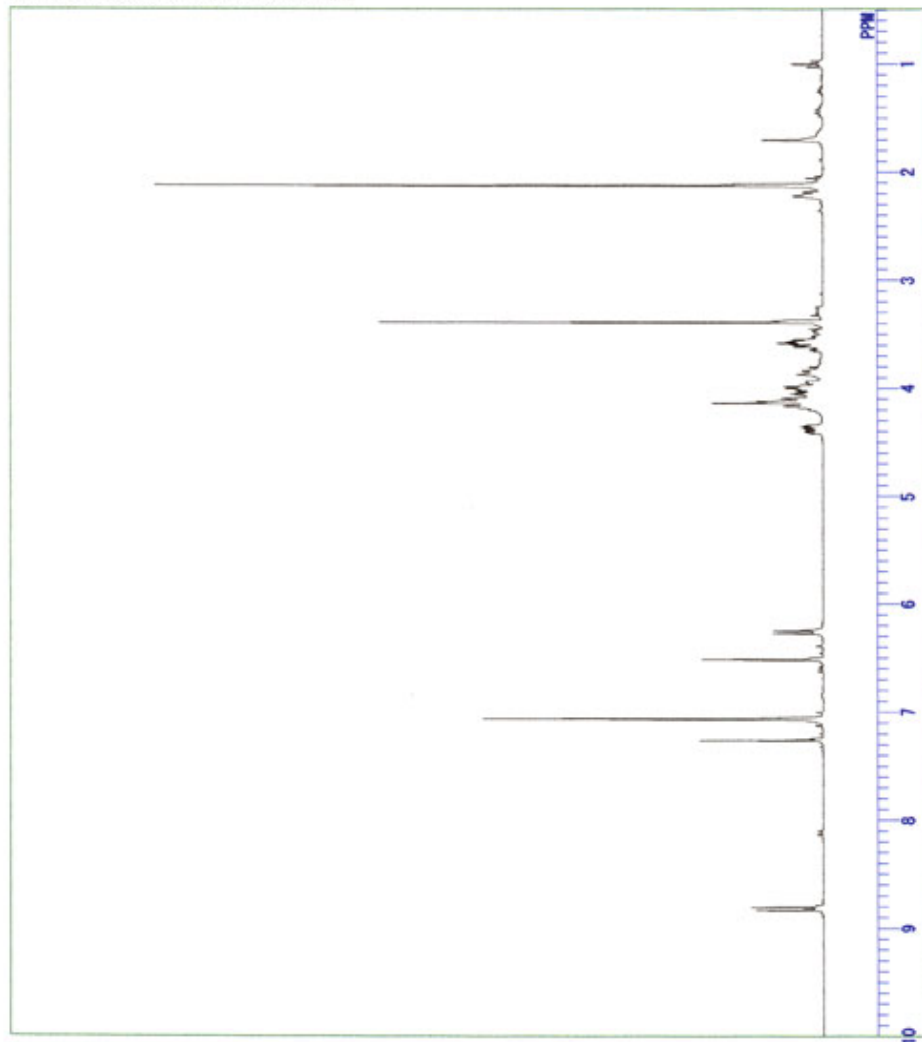

<sup>1</sup>H NMR spectrum

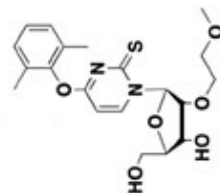

23

C:\My Documents\Kokamoto\2' -MOE-2,6-  
 DF1E COMMT  
 DATIM Sat Jul 26 16:09:35 2003  
 13C  
 EXMOD BCM  
 OBFRQ 67.80 MHz  
 OBSET 135.00 KHz  
 OBFIN 5200.0 Hz  
 POINT 32768  
 FREQ 18315.0 Hz  
 SCANS 1238  
 ACQTM 1.789 sec  
 PD 1.211 sec  
 PWT 4.4 us  
 1H  
 IRNUC 1H  
 CTMP 26.3 o  
 CDCL3  
 SLVT CDCL3  
 EXREF 77.00 ppm  
 RF 0.20 Hz  
 RGAIN 27

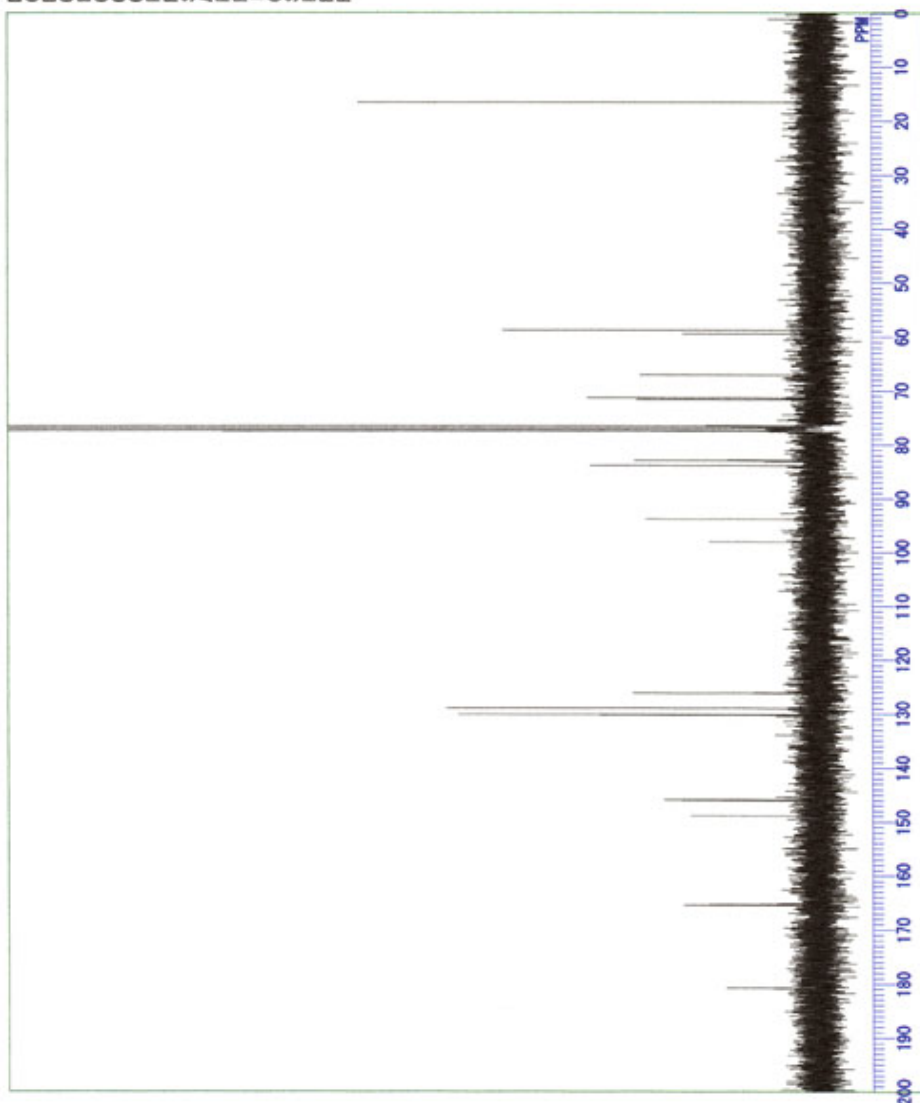

<sup>13</sup>C NMR spectrum

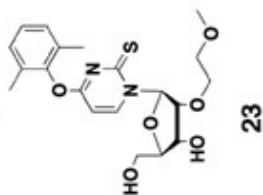

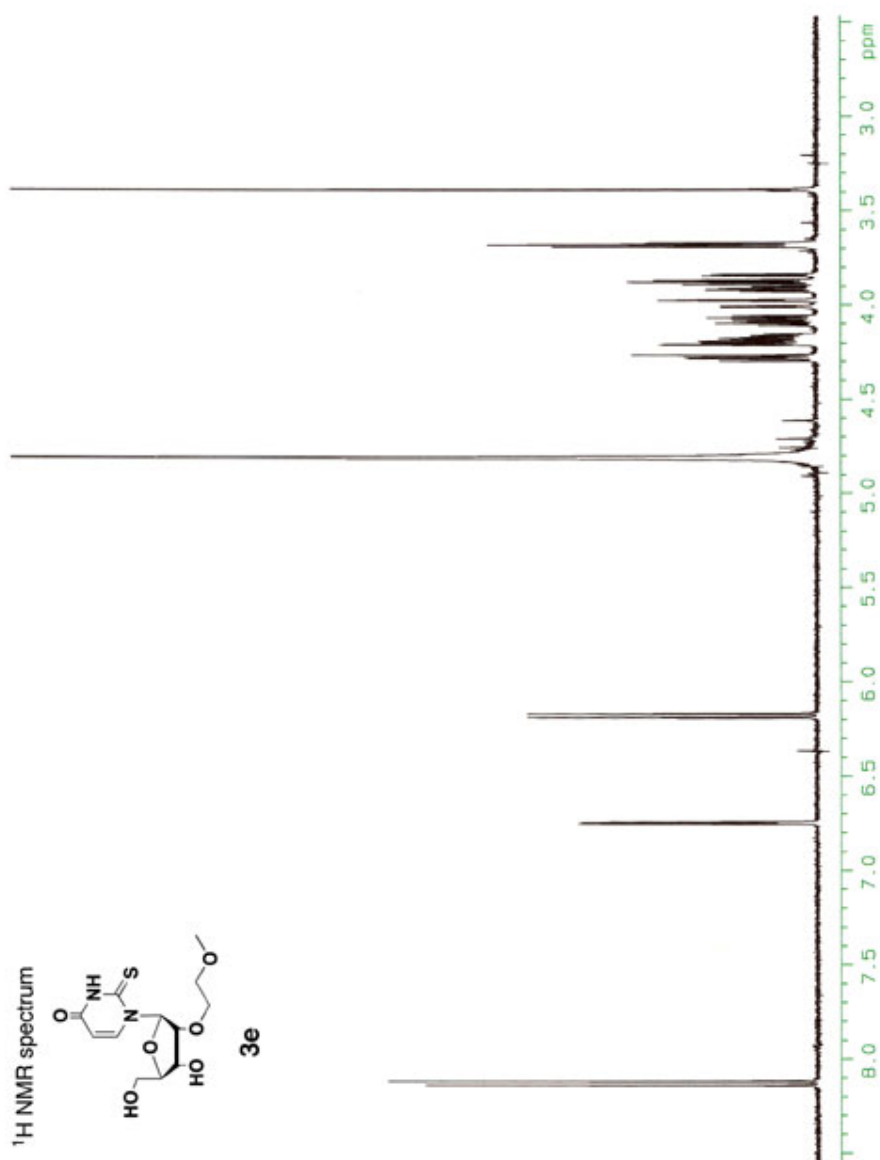

C:\WINNMR98\COMMON\DEFAULT.ALS

DEFILE C:\WINNMR98\COMMON\DEFAULT.ALS

COMPT Mon May 19 10:45:23 2003  
DATIN 13C  
ORNUC 13C  
EXMOD BCM  
ORPRO 67.80 MHz  
ORSET 135.00 KHz  
ORFIN 5200.0 Hz  
POINT 32768  
FREQ 18315.0 Hz  
SCANS 288  
ACQTM 1.789 sec  
PD 1.211 sec  
PWT 4.4 us  
IRNUC 1H  
CTEMP 23.9 o  
SOLVT DMSO  
EXREF 39.50 ppm  
RGAIN 0.20 Hz  
27

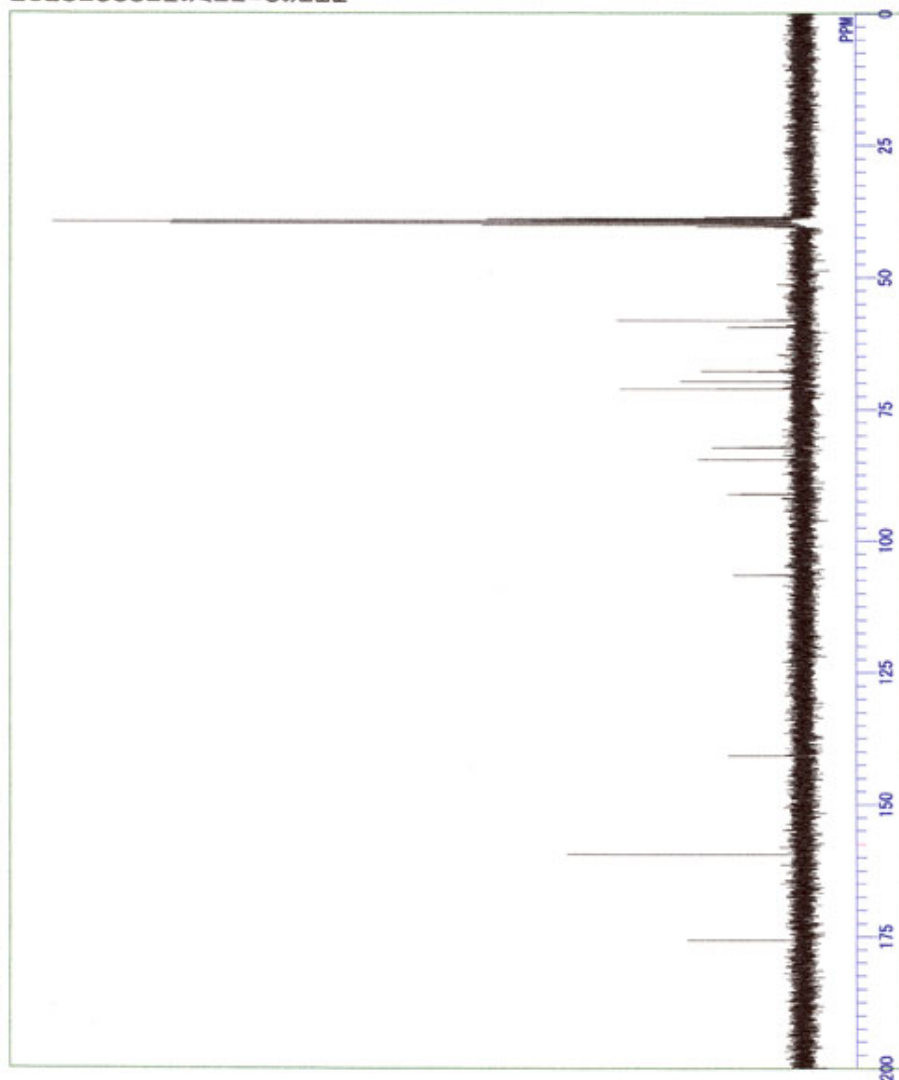

<sup>13</sup>C NMR spectrum

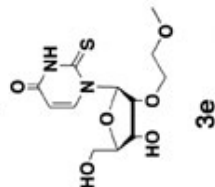

DFILE C:\My Documents\Yokamoto\5' DMT-2'-allyl s.

COMPT Mon Apr 28 12:18:09 2003

OBNUC 1H

EXMOD NON

OBFRQ 270.05 MHz

OBSET 112.00 KHz

OBFIN 5800.0 Hz

POINT 16384

FREQ 5402.4 Hz

SCANS 8

ACQTM 3.033 sec

PD 3.967 sec

PW 5.1 us

IRNUC 1H

CTEMP 23.4 C

SLVNT CDCL3

EXREF 7.24 ppm

BF 0.12 Hz

RGAIN 21

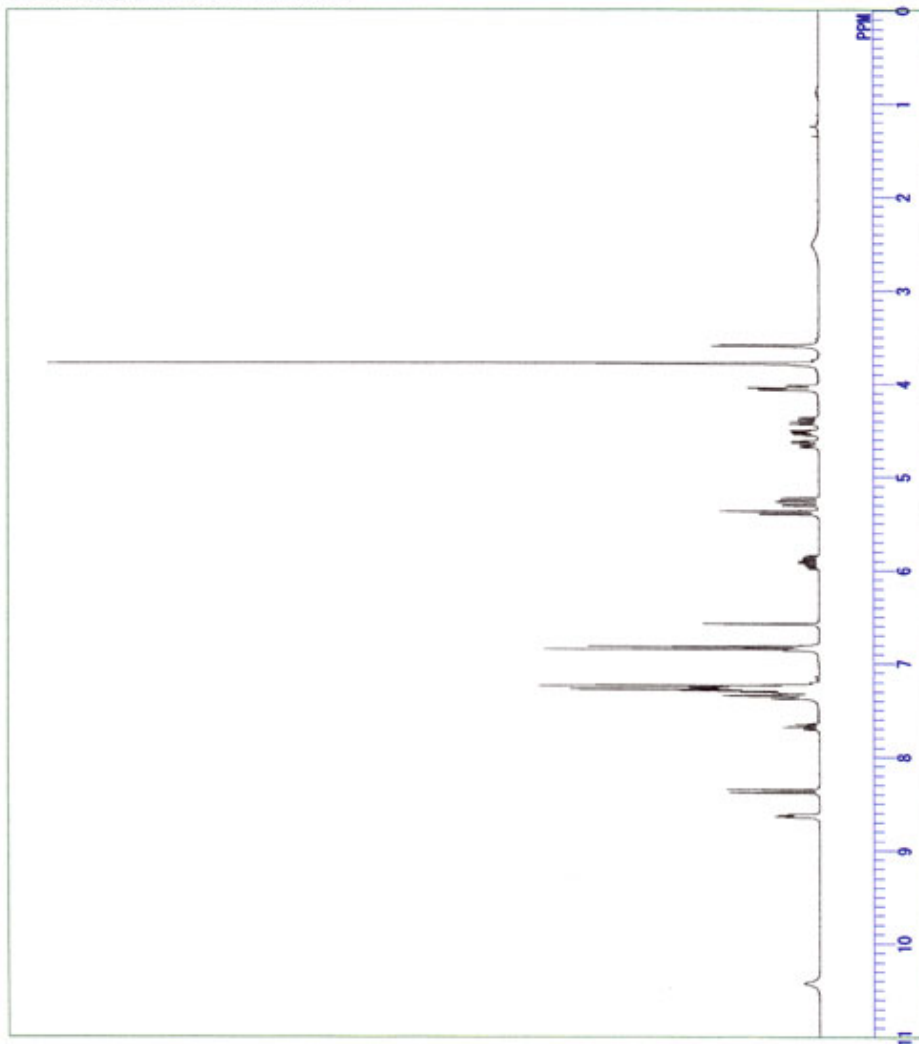

<sup>1</sup>H NMR spectrum

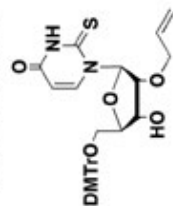

24c

D:\My Documents\Kokamoto\5' DMTr-2' -a  
 COMPT Mon Apr 28 13:07:40 2003  
 DATUM 13C  
 EXM00 BCM 67.80 MHz  
 OBSFQ 135.00 KHz  
 OBSSET 5200.0 Hz  
 OBSF IN 32768  
 POINT 18315.0 Hz  
 FREQ 891  
 SCANS 1.789 sec  
 ACQTM 1.211 sec  
 PD 4.4 us  
 PWT 1H 22.9 c  
 IRRUC SLVNT CDCL3  
 CTMP 77.00 ppm  
 EXREF BF 0.20 Hz  
 RGAIN 27

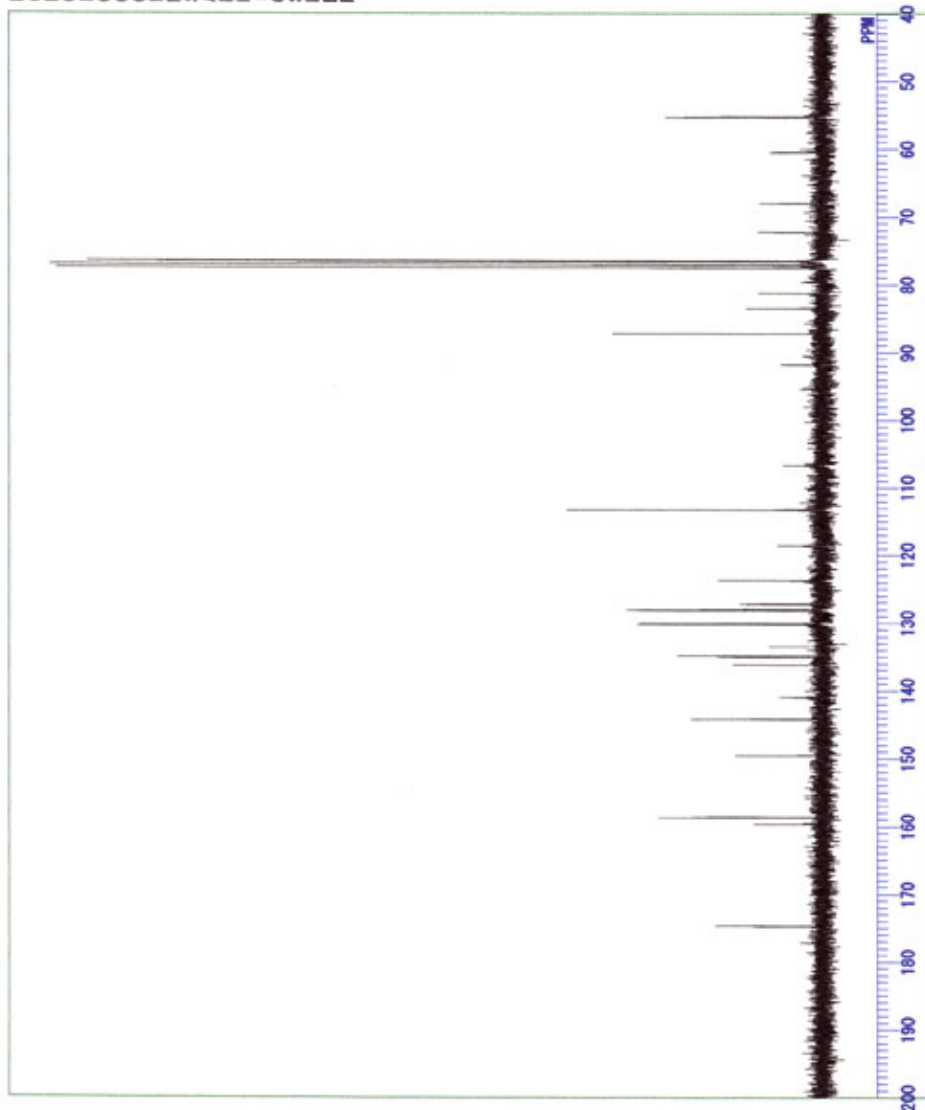

<sup>13</sup>C NMR spectrum

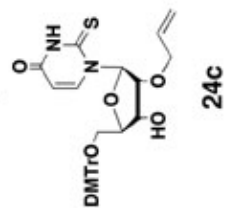



C:\My Documents\kokamoto\5'-DMTr 2'-CH2CH2

DF FILE  
 COUNT  
 DATE Mon Apr 28 15:26:03 2003  
 ORNUC 1H  
 EXMDO NON  
 ORFRO 270.05 MHz  
 ORSET 112.00 KHz  
 ORFIN 5800.0 Hz  
 POINT 16384  
 FREQU 5402.4 Hz  
 SCANS 64  
 ACQTM 3.033 sec  
 PD 3.967 sec  
 PW1 5.1 us  
 IRNUC 1H  
 CTEMP 21.9 c  
 SLVNT CDCL3  
 EXREF 7.24 ppm  
 RF 0.20 Hz  
 RGAIN 25

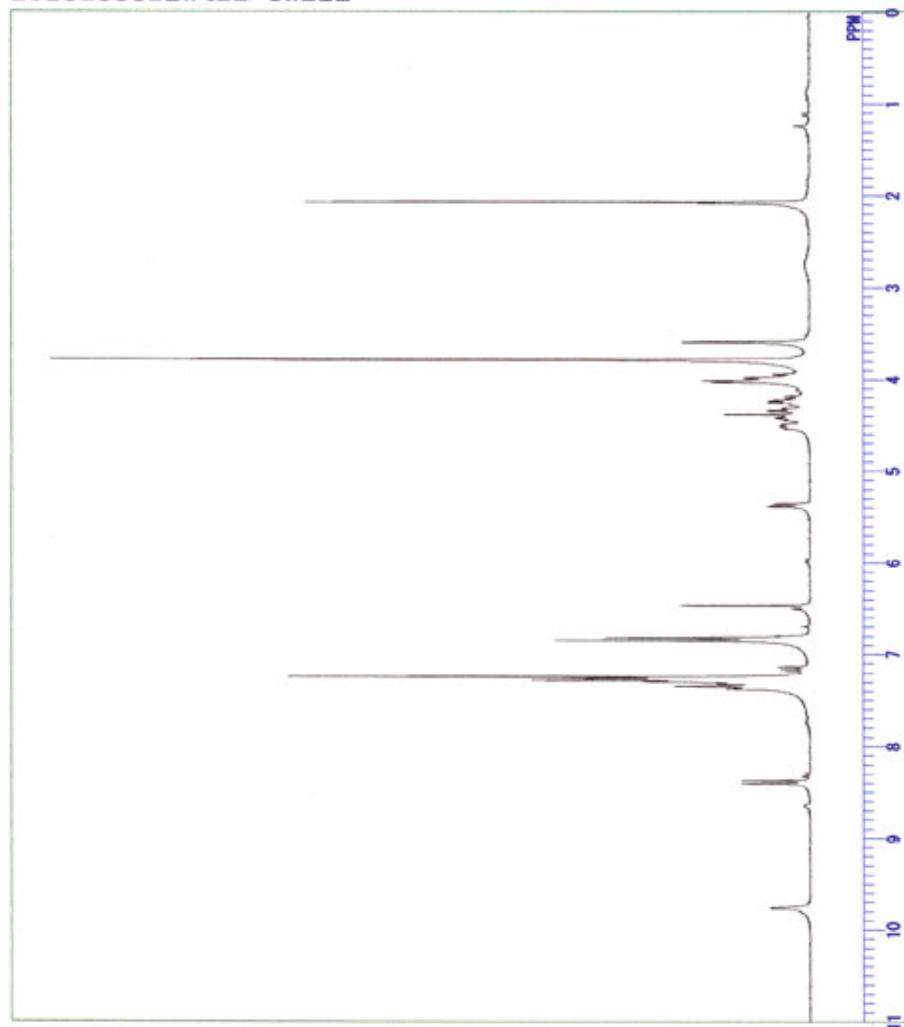

<sup>1</sup>H NMR spectrum

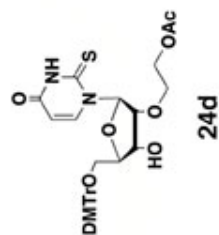

C:\My Documents\Yokamoto\27-O-R 4

DFILE COMINT  
 DATIM Tue Apr 29 18:45:48 2003  
 13C  
 EXMOD BCM  
 OBFRQ 67.80 MHz  
 OBSET 135.00 KHz  
 OBFIN 5200.0 Hz  
 POINT 32768  
 FREQU 18315.0 Hz  
 SCANS 431  
 ACQTM 1.789 sec  
 PD 1.211 sec  
 PW1 5.2 us  
 1H 23.0 c  
 CDCL3 77.00 ppm  
 EXREF BF 0.12 Hz  
 RGAIN 28

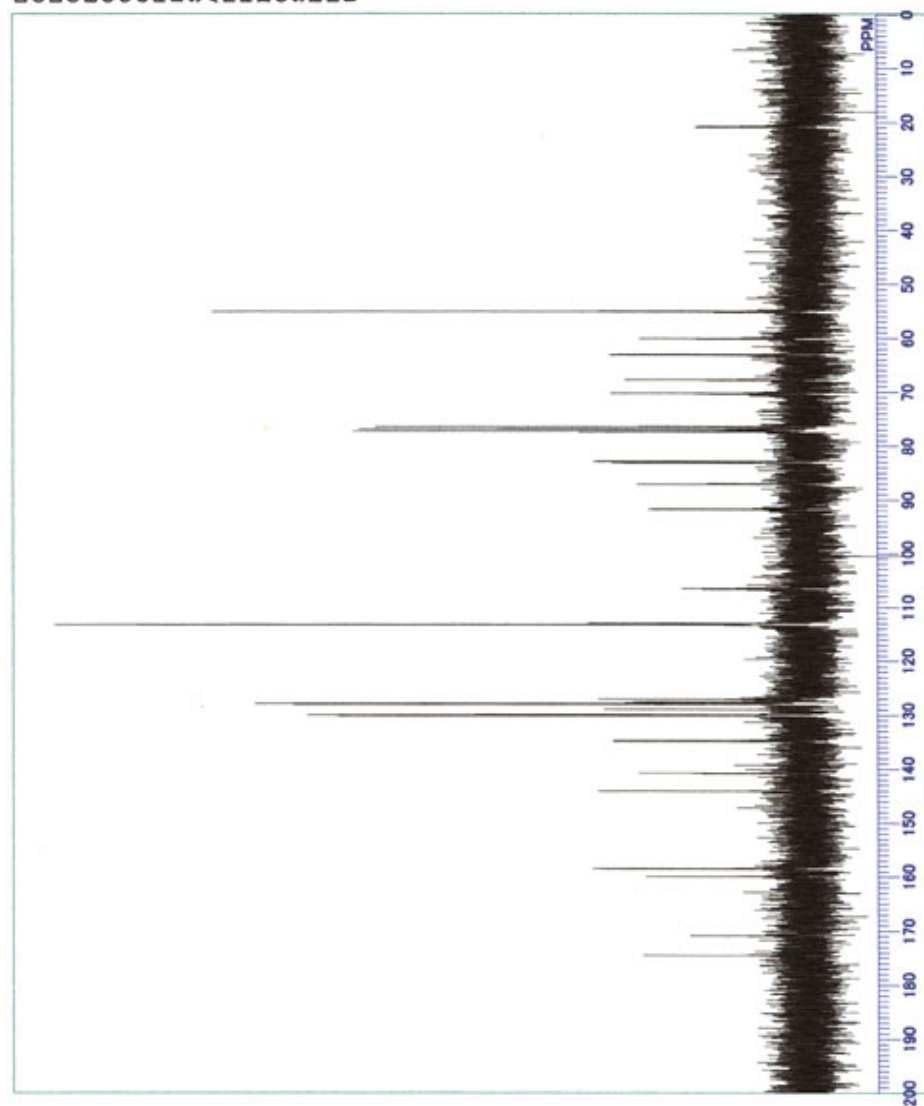

<sup>13</sup>C NMR spectrum

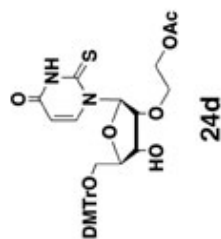

C:\MY Documents\Kamato\5 DMTr-2'-MOE s2U  
 DF FILE  
 COMNT  
 DATIM Wed May 14 17:00:31 2003  
 OBNJC 1H  
 EXMOD NON  
 OFFRQ 270.05 MHz  
 OBSET 112.00 KHz  
 OFEIN 5800.0 Hz  
 POINT 16384  
 FREQD 5402.4 Hz  
 SCANS 8  
 ACQIM 3.033 sec  
 PD 3.967 sec  
 PWT 5.1 us  
 IRNUC 1H  
 CTEMP 22.7 c  
 SLVNT CDCL3  
 EXREF 7.24 ppm  
 BF 0.20 Hz  
 RGAIN 20

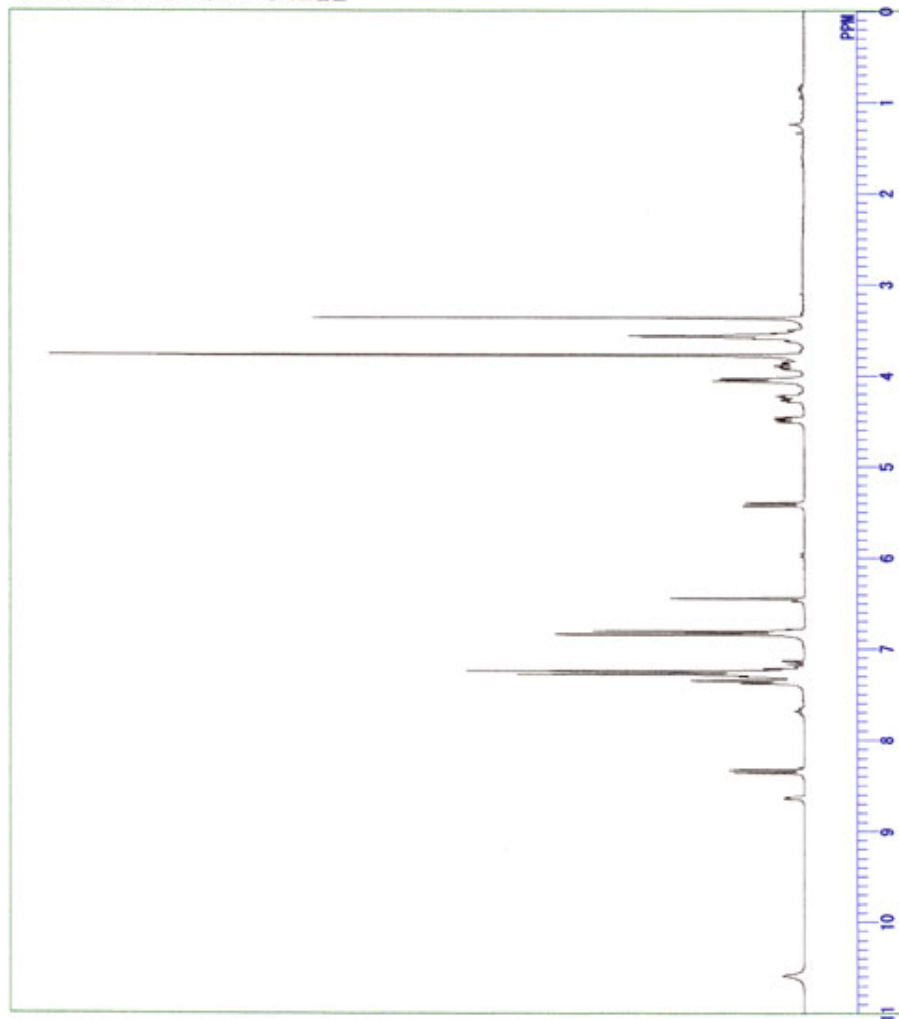

<sup>1</sup>H NMR spectrum

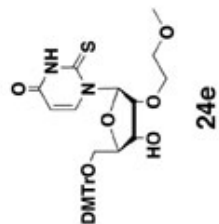

DFILE C:\My Documents\Kokamoto\5' DMTr-2'-M  
 COMMT Wed May 14 17:14:51 2003  
 DATIM 13C  
 OBNUC 67.80 MHz  
 EXMOD 135.00 KHz  
 OBFRQ 5200.0 Hz  
 OBSET 32768  
 OBFIN 18315.0 Hz  
 POINT 208  
 FREQ 1.789 sec  
 SCANS 1.211 sec  
 ACQTM 4.4 us  
 PD 1H  
 PW1 22.8 g  
 IRNUC CDCL3  
 CTMP 77.00 ppm  
 SLVT EXREF 0.20 Hz  
 BF 27  
 RGAIN

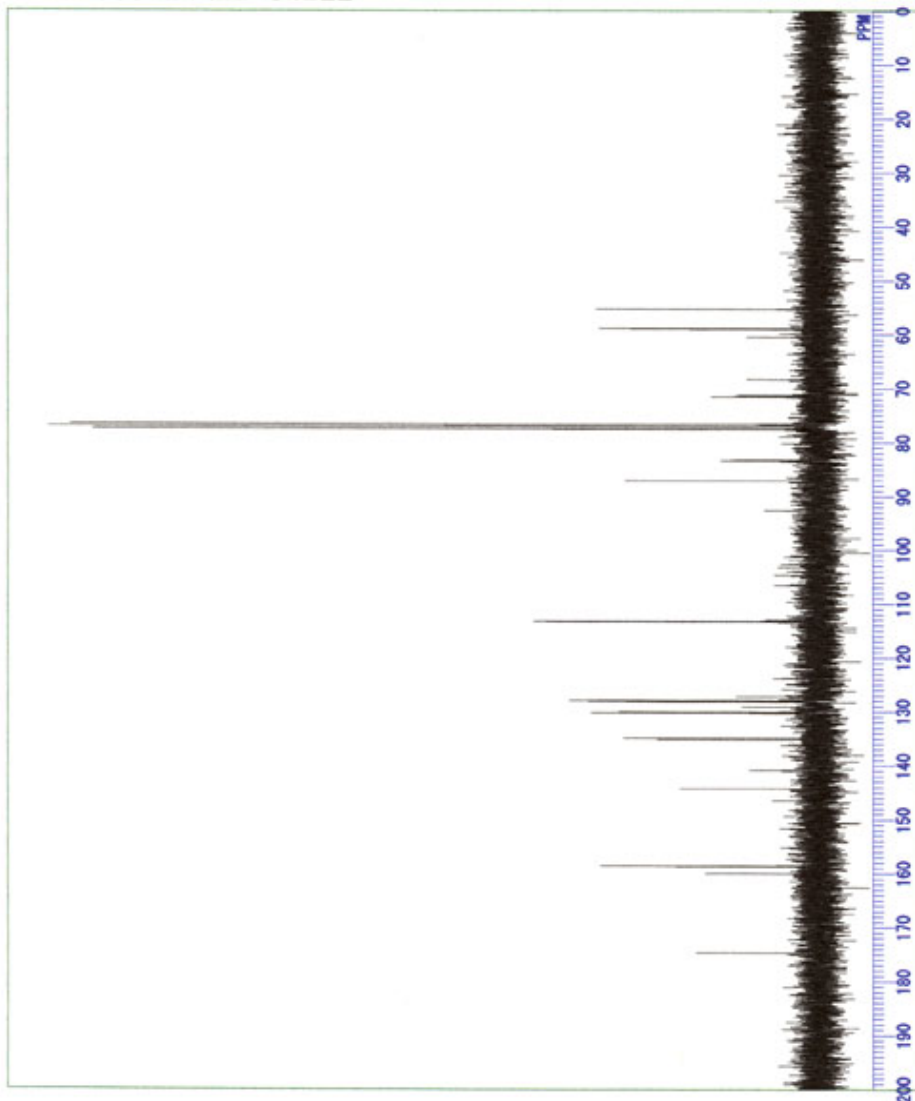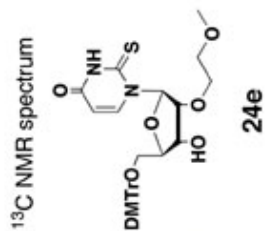

DFILE C:\My Documents\Kokamoto\20 amideV2'-0-

COMET  
 DATIM Sat Aug 02 20:51:58 2003  
 ORNUC 1H  
 EXMOD NON  
 OFPRO  
 OFSET 270.05 MHz  
 OFSET 112.00 KHz  
 OFSET 5800.0 Hz  
 POINT 16384  
 FREQ 5402.4 Hz  
 SCANS 8  
 ACQTIM 3.033 sec  
 PD 3.967 sec  
 PRT 5.1 us  
 IN 1H  
 INUC 34.3 o  
 CTMP  
 SLVIT CQGL3 7.24 ppm  
 EXREF 0.20 Hz  
 BF 20  
 RGAIN

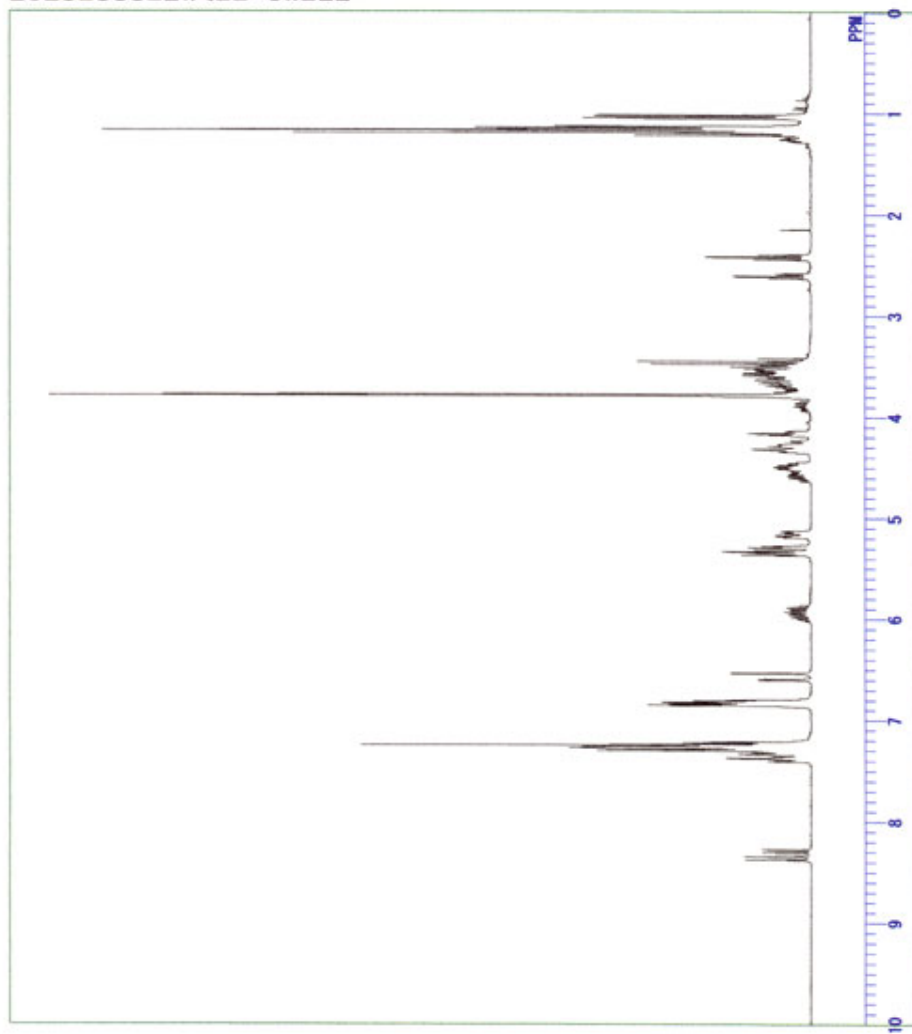

<sup>1</sup>H NMR spectrum

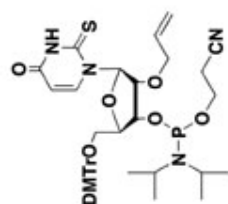

25c

CC(C)N(C(C)C)COP(=O)(OCC#N)OCC1C(OC1COC2=CN=C(NC(=O)O2)S)COC3=CC=CC=C3

**25c**

DFILE C:\My Documents\Kokamoto\20 amide  
 COMINT  
 DATIM Sat Aug 02 20:48:47 2003  
 GENUC 31P  
 EXM00 BCM  
 QBFRQ 109.25 MHz  
 QBSET 121.10 KHz  
 QBFIN 36.4 Hz  
 POINT 32768  
 FREQU 400000.0 Hz  
 SCANS 80  
 ACQIM 0.819 sec  
 PD 5.000 sec  
 PWT 7.1 us  
 TRNUC 1H  
 CTEMP 34.8 c  
 SLVNT CDCL3  
 EXREF 0.00 ppm  
 BF 0.20 Hz  
 RGAIN 31

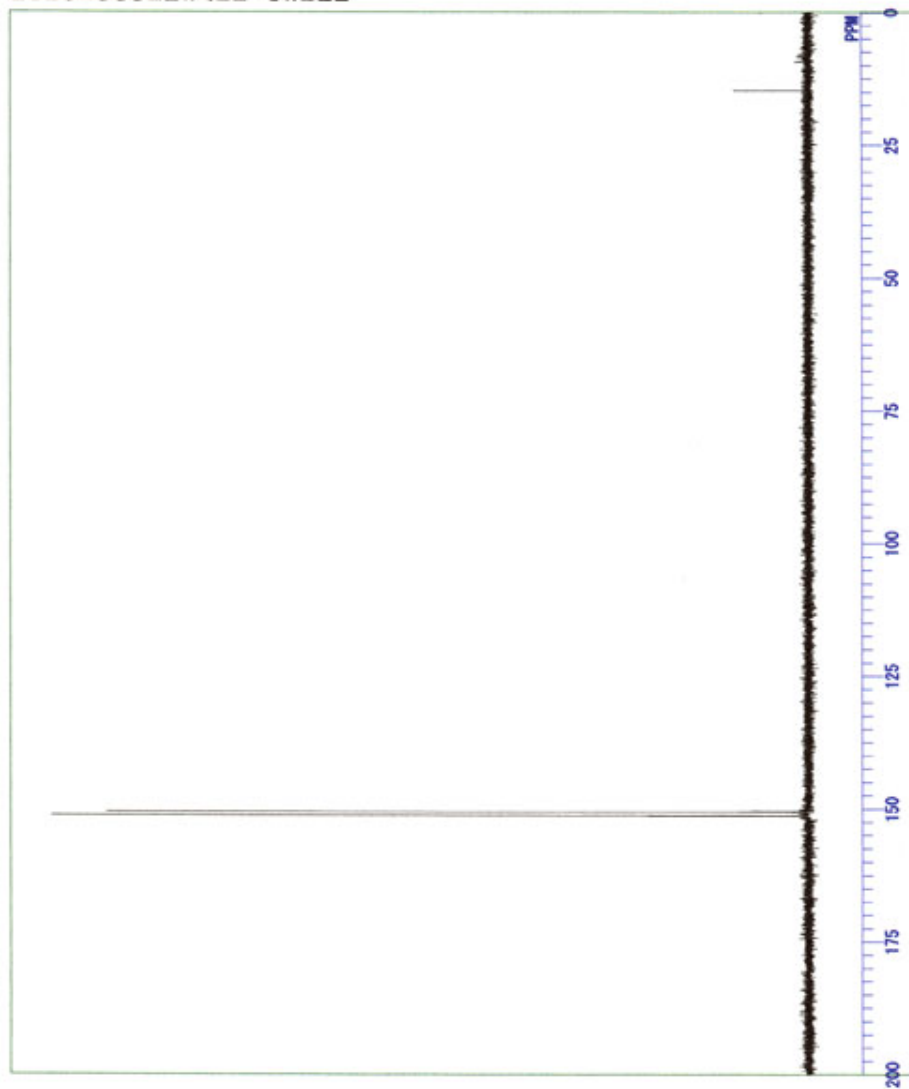

$^{31}\text{P}$  NMR spectrum

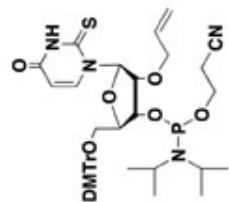

25c

OFILE C:\Nky Documents\Yokamoto\20\2003 2003  
 COMPT Fri Aug 01 20:41:33 2003  
 DATIM TH  
 GENUC TH  
 EXMOD NON  
 OBSFRQ 270.05 MHz  
 OBSSET 112.00 KHz  
 OBSF1N 5800.0 Hz  
 POINT 16384  
 FREQU 5402.4 Hz  
 SCANS 16  
 ACQTM 3.033 sec  
 PD 3.987 sec  
 PWT 5.1 us  
 IRNUC 1H  
 CTMP 32.5 c  
 SLVNT CDCL3  
 EXREF 7.24 ppm  
 BF 0.20 Hz  
 RGAIN 19

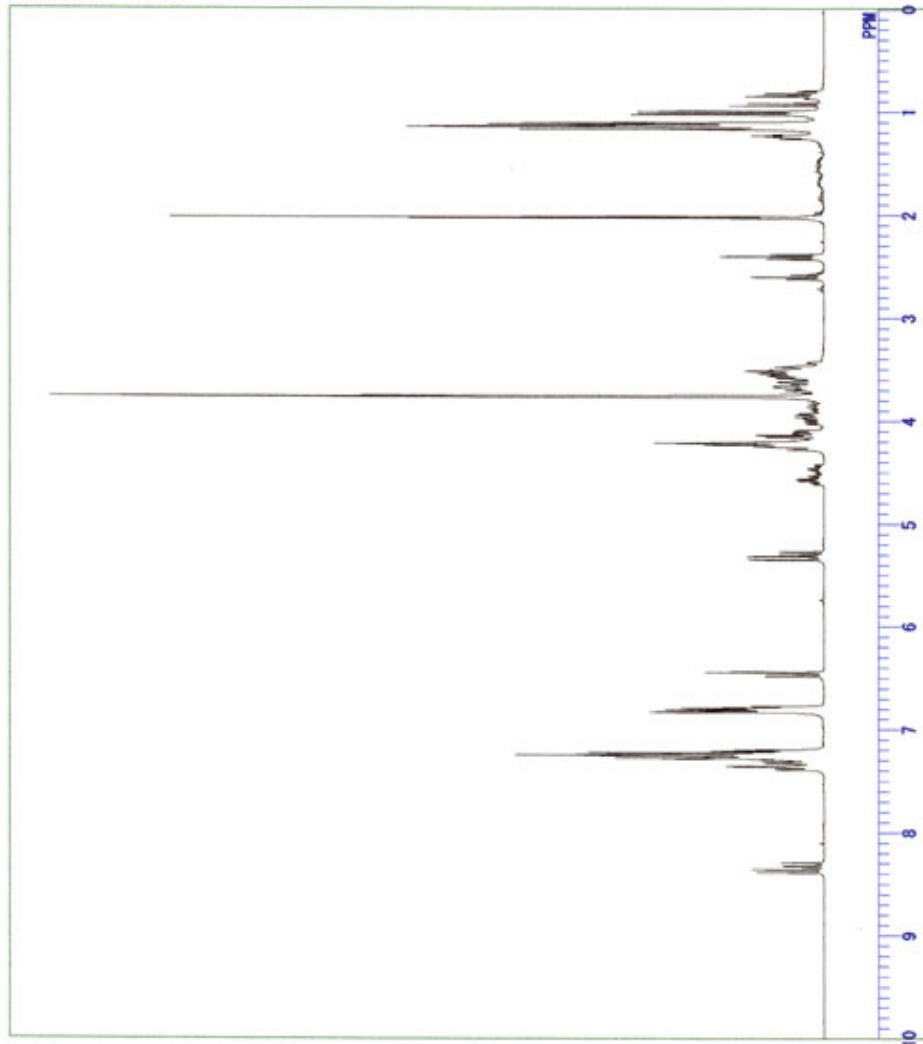

<sup>1</sup>H NMR spectrum

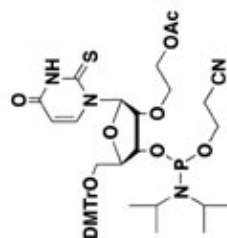

25d



C:\My Documents\Yokamoto\20 anidite

DFILE  
COMNT  
DATIM  
FRI Aug 01 21:30:32 2003  
13C  
OBNUC  
EXMOD  
BOM  
67.80 MHz  
135.00 KHz  
5200.0 Hz  
32768  
18315.0 Hz  
729  
1.789 sec  
1.211 sec  
4.4 us  
1H  
IRNUC  
CTEMP  
CDCL3  
33.5 °  
SLVNT  
EXREF  
BF  
RGAIN  
77.00 ppm  
0.20 Hz  
29

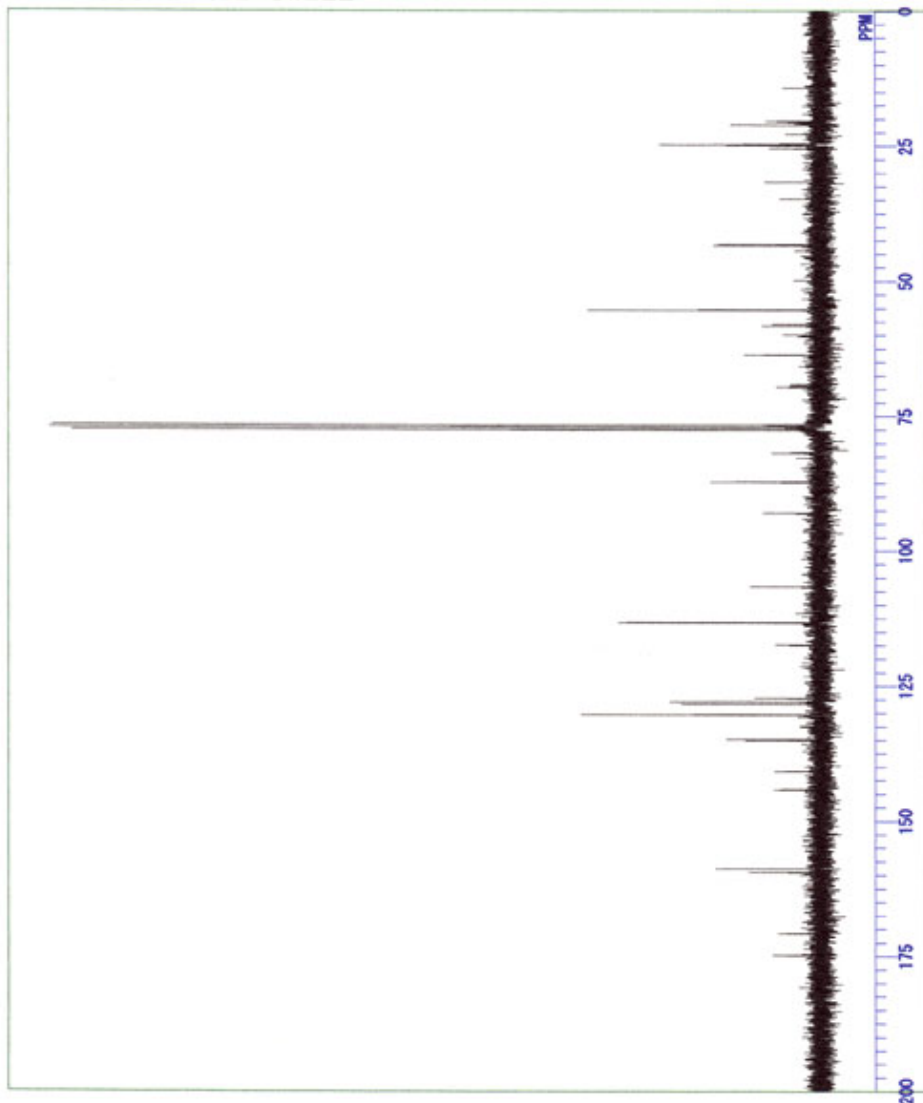

<sup>13</sup>C NMR spectrum

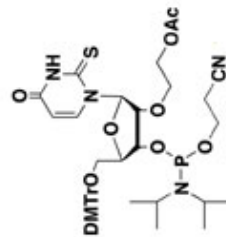

25d

The spectrum shows two distinct signals. The first signal is a triplet centered at approximately 150 ppm, with a peak height of about 1.5 units. The second signal is a quartet centered at approximately 40 ppm, with a peak height of about 1.0 unit. The baseline is flat and noisy, with minor fluctuations around 100 ppm and 175 ppm.

CN(C)C(=O)[C@H]1[C@@H](OC(=O)c2ccccc2)[C@H](OC(=O)c3ccccc3)[C@H](OC(=O)c4ccccc4)[C@H](OP(=O)(c5ccccc5)OC6=CNC(=S)N=C6N)O1

25d

DFILE C:\WINNMR98\COMMON\DEFAULT.ALS  
 COUNT  
 DATIM Fri Aug 08 21:56:23 2003  
 OBNUC 1H  
 EXMOD NON  
 OBFRQ 270.05 MHz  
 OBSET 112.00 KHz  
 OBFIN 5800.0 Hz  
 POINT 16384  
 FREQU 5402.4 Hz  
 SCANS 32  
 ACQTIM 3.033 sec  
 PD 3.967 sec  
 PW 5.1 us  
 IRNUC 1H  
 CTEMP 28.5 C  
 SLVNT CDCL3  
 EXREF 7.24 ppm  
 BF 0.20 Hz  
 RGAIN 21

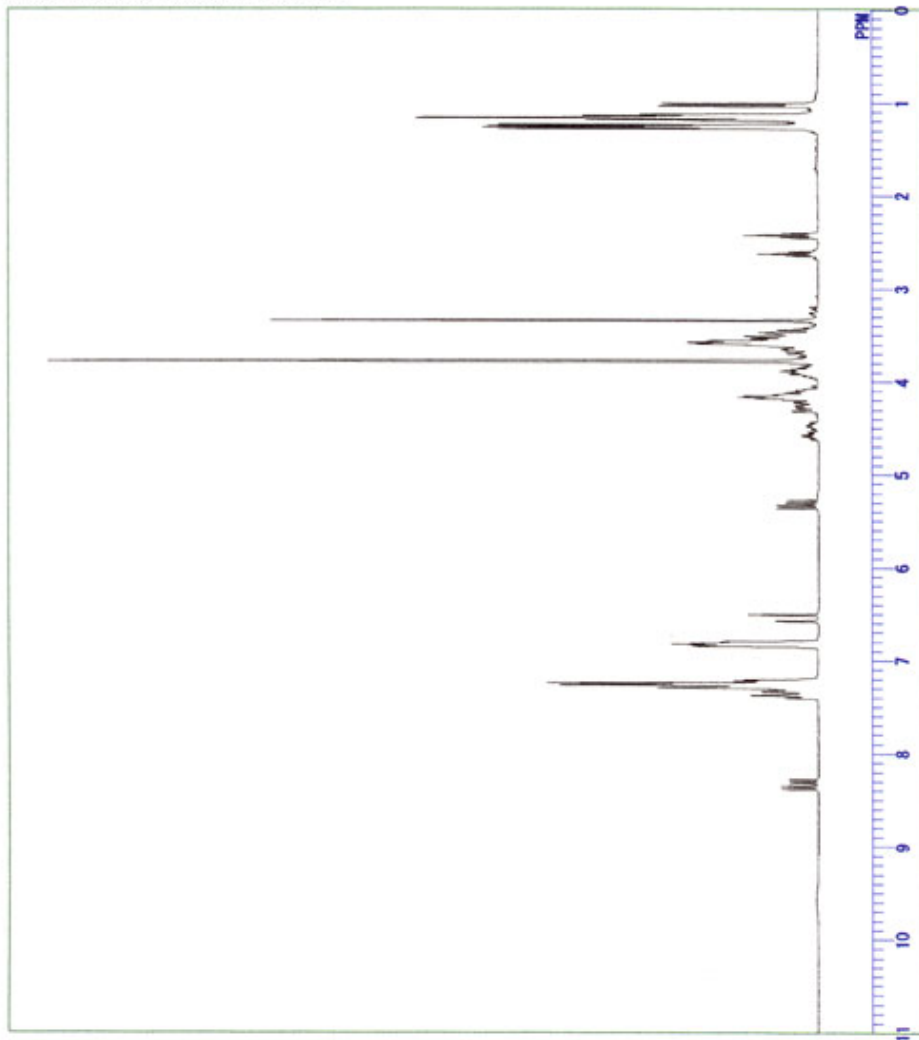

<sup>1</sup>H NMR spectrum

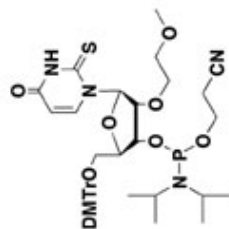

25e

DFILE C:\WINNMR98\COMMON\DEFAULT.ALS  
 COUNT  
 DATE Fri Aug 08 23:33:57 2003  
 OBNUC 13C  
 EXMOD BCM  
 OBPRO 67.80 MHz  
 OBSET 135.00 KHz  
 OBFTN 5200.0 Hz  
 POINT 32768  
 FREQU 18315.0 Hz  
 SCANS 1859  
 ACQTM 1.789 sec  
 PD 1.211 sec  
 PW1 4.4 us  
 1H  
 IRNUC 28.6 c  
 CTEMP CDCL3  
 SLVNT 77.00 ppm  
 EXREF 0.20 Hz  
 BF 28  
 RGAIN

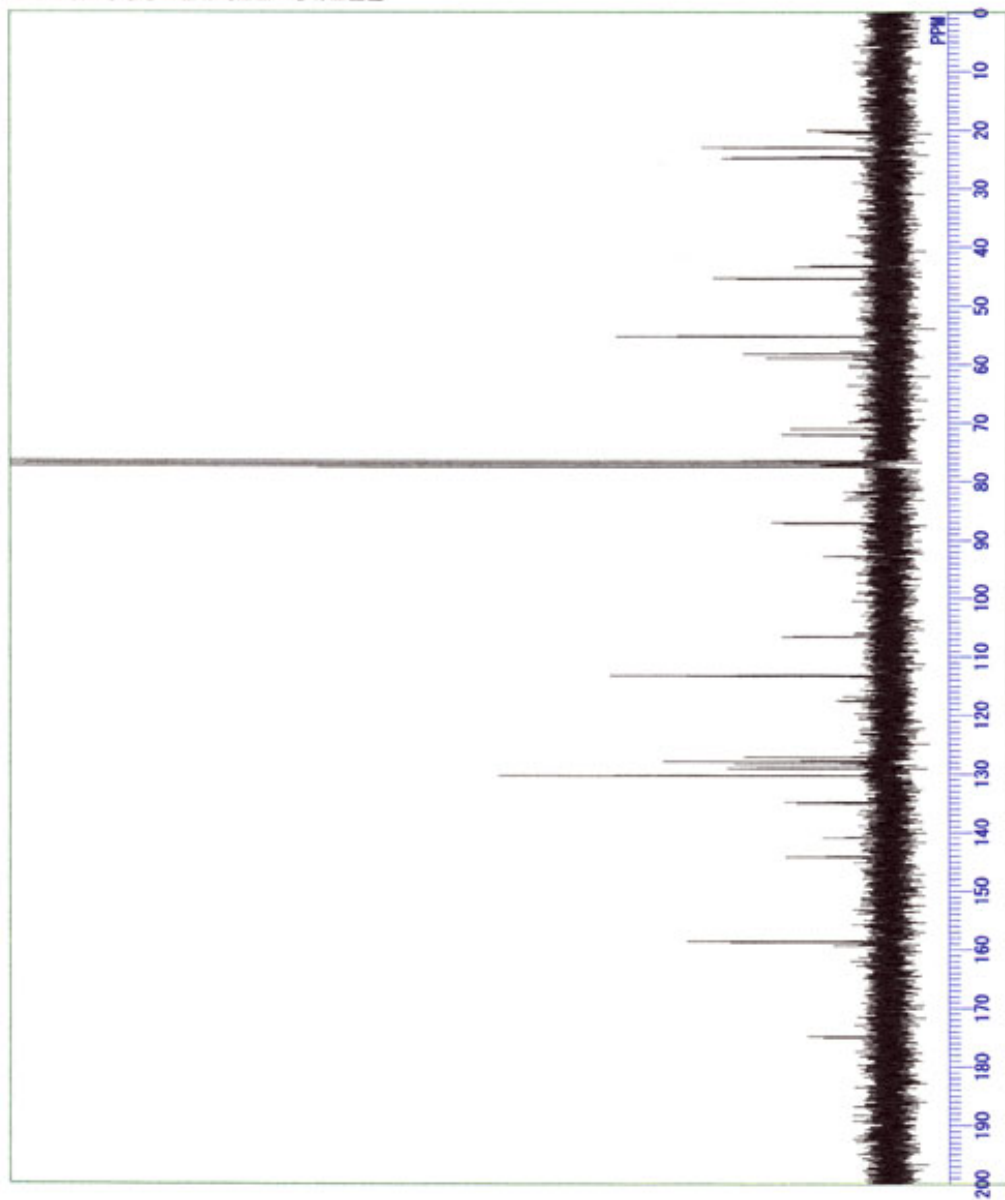

<sup>13</sup>C NMR spectrum

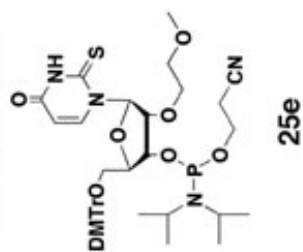

25e

DF:FILE C:\Nly Documents\Kamato\anhydro met  
 COMINT Mon Mar 18 13:02:32 2002  
 DATIM 31P  
 OBNUC 8CM  
 EXM00 109.25 MHz  
 OBF00 121.10 KHz  
 OBF01 36.4 Hz  
 POINT 32768  
 FREQ0 40000.0 Hz  
 SCANS 76  
 ACQTM 0.819 sec  
 PD 5.000 sec  
 PW1 7.1 us  
 TRNJC 1H  
 CTMP 24.1 c  
 SLVNT CDCL3  
 EXREF 0.00 ppm  
 RF 0.20 Hz  
 RGAIN 26

<sup>31</sup>P NMR spectrum

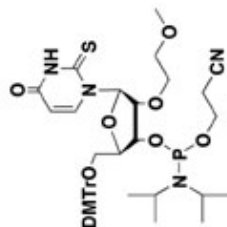

25e

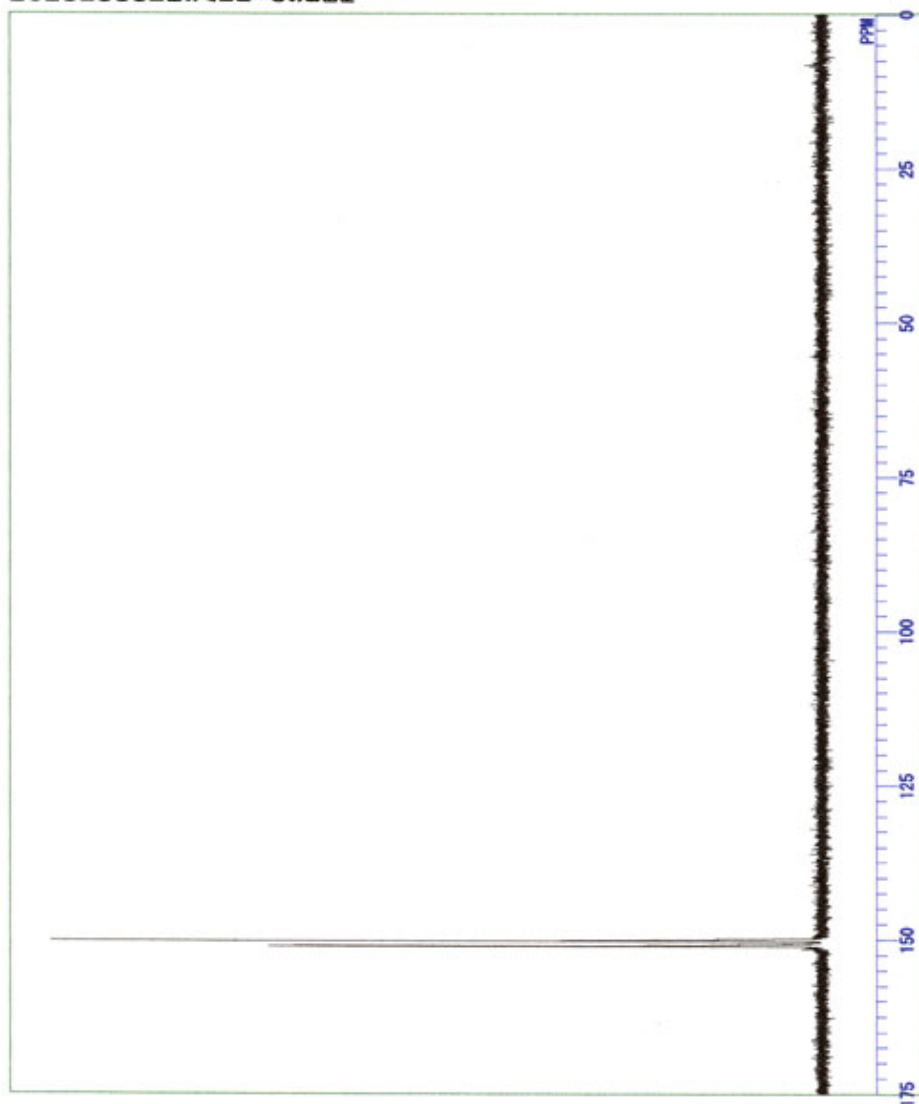

Supplement: Supplementary file 1 [file 5194381]
